# Supplementary material for: An overview of the National COVID-19 Chest Imaging Database: data quality and cohort analysis
Source: PubMed Central journal article supplement (PMC8633457; doi:10.1093/gigascience/giab076), 2021-11-25

# GigaScience

## An overview of the National COVID-19 Chest Imaging Database: data quality and cohort analysis --Manuscript Draft--

|                                                      |                                                                                                                                                                                                                                                                                                                                                                                                                                                                                                                                                                                                                                                                                                                                                                                                                                                                                                                                                                                                                                                                                                                                                                                                                                                                                                                                                                                                                                                                                                                                                                                                                                                                                                                                                                                                                        |                |
|------------------------------------------------------|------------------------------------------------------------------------------------------------------------------------------------------------------------------------------------------------------------------------------------------------------------------------------------------------------------------------------------------------------------------------------------------------------------------------------------------------------------------------------------------------------------------------------------------------------------------------------------------------------------------------------------------------------------------------------------------------------------------------------------------------------------------------------------------------------------------------------------------------------------------------------------------------------------------------------------------------------------------------------------------------------------------------------------------------------------------------------------------------------------------------------------------------------------------------------------------------------------------------------------------------------------------------------------------------------------------------------------------------------------------------------------------------------------------------------------------------------------------------------------------------------------------------------------------------------------------------------------------------------------------------------------------------------------------------------------------------------------------------------------------------------------------------------------------------------------------------|----------------|
| <b>Manuscript Number:</b>                            | GIGA-D-21-00096R2                                                                                                                                                                                                                                                                                                                                                                                                                                                                                                                                                                                                                                                                                                                                                                                                                                                                                                                                                                                                                                                                                                                                                                                                                                                                                                                                                                                                                                                                                                                                                                                                                                                                                                                                                                                                      |                |
| <b>Full Title:</b>                                   | An overview of the National COVID-19 Chest Imaging Database: data quality and cohort analysis                                                                                                                                                                                                                                                                                                                                                                                                                                                                                                                                                                                                                                                                                                                                                                                                                                                                                                                                                                                                                                                                                                                                                                                                                                                                                                                                                                                                                                                                                                                                                                                                                                                                                                                          |                |
| <b>Article Type:</b>                                 | Data Note                                                                                                                                                                                                                                                                                                                                                                                                                                                                                                                                                                                                                                                                                                                                                                                                                                                                                                                                                                                                                                                                                                                                                                                                                                                                                                                                                                                                                                                                                                                                                                                                                                                                                                                                                                                                              |                |
| <b>Funding Information:</b>                          | NHSX                                                                                                                                                                                                                                                                                                                                                                                                                                                                                                                                                                                                                                                                                                                                                                                                                                                                                                                                                                                                                                                                                                                                                                                                                                                                                                                                                                                                                                                                                                                                                                                                                                                                                                                                                                                                                   | Not applicable |
| <b>Abstract:</b>                                     | <p>Background: The National COVID-19 Chest Imaging Database (NCCID) is a centralised database containing chest X-rays, Computed Tomography (CT) scans and cardiac Magnetic Resonance Images (MRI) from patients across the UK. The objective of the initiative is to support a better understanding of the coronavirus SARS-CoV-2 disease (COVID-19) and the development of machine learning technologies that will improve care for patients hospitalised with a severe COVID-19 infection. The NCCID is now accumulating data from 20 NHS sites across England and Wales, with a total contribution of approximately 25,000 imaging studies in the training set (at time of writing) and is actively being used as a research tool by several organisations.</p> <p>Findings: This paper introduces the training dataset, including a snapshot analysis covering: the completeness of clinical data, and availability of image data for the various use-cases (diagnosis, prognosis, longitudinal risk). Findings suggests the NCCID is well suited for developing clinical models, but developers should take care to mitigate the common model confounders, e.g., equipment type, that are highlighted. In addition, a cohort analysis was performed to measure the representativeness of the NCCID to the wider COVID-19 affected population. Three major aspects were included: geographic, demographic and temporal coverage, revealing good alignment in some categories, e.g., sex, whilst also identifying areas for improvements to data collection methods, particularly with respect to geographic coverage.</p> <p>Conclusion: The NCCID is a growing resource that provides researchers with a large, high-quality database that can be leveraged to support the response to the COVID-19 pandemic.</p> |                |
| <b>Corresponding Author:</b>                         | Dominic Cushnan<br>NHS AI Lab, NHSX<br>London, UNITED KINGDOM                                                                                                                                                                                                                                                                                                                                                                                                                                                                                                                                                                                                                                                                                                                                                                                                                                                                                                                                                                                                                                                                                                                                                                                                                                                                                                                                                                                                                                                                                                                                                                                                                                                                                                                                                          |                |
| <b>Corresponding Author Secondary Information:</b>   |                                                                                                                                                                                                                                                                                                                                                                                                                                                                                                                                                                                                                                                                                                                                                                                                                                                                                                                                                                                                                                                                                                                                                                                                                                                                                                                                                                                                                                                                                                                                                                                                                                                                                                                                                                                                                        |                |
| <b>Corresponding Author's Institution:</b>           | NHS AI Lab, NHSX                                                                                                                                                                                                                                                                                                                                                                                                                                                                                                                                                                                                                                                                                                                                                                                                                                                                                                                                                                                                                                                                                                                                                                                                                                                                                                                                                                                                                                                                                                                                                                                                                                                                                                                                                                                                       |                |
| <b>Corresponding Author's Secondary Institution:</b> |                                                                                                                                                                                                                                                                                                                                                                                                                                                                                                                                                                                                                                                                                                                                                                                                                                                                                                                                                                                                                                                                                                                                                                                                                                                                                                                                                                                                                                                                                                                                                                                                                                                                                                                                                                                                                        |                |
| <b>First Author:</b>                                 | Dominic Cushnan                                                                                                                                                                                                                                                                                                                                                                                                                                                                                                                                                                                                                                                                                                                                                                                                                                                                                                                                                                                                                                                                                                                                                                                                                                                                                                                                                                                                                                                                                                                                                                                                                                                                                                                                                                                                        |                |
| <b>First Author Secondary Information:</b>           |                                                                                                                                                                                                                                                                                                                                                                                                                                                                                                                                                                                                                                                                                                                                                                                                                                                                                                                                                                                                                                                                                                                                                                                                                                                                                                                                                                                                                                                                                                                                                                                                                                                                                                                                                                                                                        |                |
| <b>Order of Authors:</b>                             | Dominic Cushnan                                                                                                                                                                                                                                                                                                                                                                                                                                                                                                                                                                                                                                                                                                                                                                                                                                                                                                                                                                                                                                                                                                                                                                                                                                                                                                                                                                                                                                                                                                                                                                                                                                                                                                                                                                                                        |                |
|                                                      | Oscar Bennett                                                                                                                                                                                                                                                                                                                                                                                                                                                                                                                                                                                                                                                                                                                                                                                                                                                                                                                                                                                                                                                                                                                                                                                                                                                                                                                                                                                                                                                                                                                                                                                                                                                                                                                                                                                                          |                |
|                                                      | Rosalind Berka                                                                                                                                                                                                                                                                                                                                                                                                                                                                                                                                                                                                                                                                                                                                                                                                                                                                                                                                                                                                                                                                                                                                                                                                                                                                                                                                                                                                                                                                                                                                                                                                                                                                                                                                                                                                         |                |
|                                                      | Ottavia Bertolli                                                                                                                                                                                                                                                                                                                                                                                                                                                                                                                                                                                                                                                                                                                                                                                                                                                                                                                                                                                                                                                                                                                                                                                                                                                                                                                                                                                                                                                                                                                                                                                                                                                                                                                                                                                                       |                |
|                                                      | Ashwin Chopra                                                                                                                                                                                                                                                                                                                                                                                                                                                                                                                                                                                                                                                                                                                                                                                                                                                                                                                                                                                                                                                                                                                                                                                                                                                                                                                                                                                                                                                                                                                                                                                                                                                                                                                                                                                                          |                |
|                                                      | Samie Dorgham                                                                                                                                                                                                                                                                                                                                                                                                                                                                                                                                                                                                                                                                                                                                                                                                                                                                                                                                                                                                                                                                                                                                                                                                                                                                                                                                                                                                                                                                                                                                                                                                                                                                                                                                                                                                          |                |
|                                                      |                                                                                                                                                                                                                                                                                                                                                                                                                                                                                                                                                                                                                                                                                                                                                                                                                                                                                                                                                                                                                                                                                                                                                                                                                                                                                                                                                                                                                                                                                                                                                                                                                                                                                                                                                                                                                        |                |

|                                                                                                                                                                                                                                                                                                                                                                                                                                                                              |                                                       |
|------------------------------------------------------------------------------------------------------------------------------------------------------------------------------------------------------------------------------------------------------------------------------------------------------------------------------------------------------------------------------------------------------------------------------------------------------------------------------|-------------------------------------------------------|
|                                                                                                                                                                                                                                                                                                                                                                                                                                                                              | Alberto Favaro                                        |
|                                                                                                                                                                                                                                                                                                                                                                                                                                                                              | Tara Ganepola                                         |
|                                                                                                                                                                                                                                                                                                                                                                                                                                                                              | Mark Halling-Brown                                    |
|                                                                                                                                                                                                                                                                                                                                                                                                                                                                              | Gergely Imreh                                         |
|                                                                                                                                                                                                                                                                                                                                                                                                                                                                              | Joseph Jacob                                          |
|                                                                                                                                                                                                                                                                                                                                                                                                                                                                              | Emily Jefferson                                       |
|                                                                                                                                                                                                                                                                                                                                                                                                                                                                              | Francois Lemarchand                                   |
|                                                                                                                                                                                                                                                                                                                                                                                                                                                                              | Daniel Schofield                                      |
|                                                                                                                                                                                                                                                                                                                                                                                                                                                                              | Jeremy C. C. Wyatt                                    |
|                                                                                                                                                                                                                                                                                                                                                                                                                                                                              | NCCID Collaborative                                   |
| <b>Order of Authors Secondary Information:</b>                                                                                                                                                                                                                                                                                                                                                                                                                               |                                                       |
| <b>Response to Reviewers:</b>                                                                                                                                                                                                                                                                                                                                                                                                                                                | comments have been addressed on the attached revision |
| <b>Additional Information:</b>                                                                                                                                                                                                                                                                                                                                                                                                                                               |                                                       |
| <b>Question</b>                                                                                                                                                                                                                                                                                                                                                                                                                                                              | <b>Response</b>                                       |
| Are you submitting this manuscript to a special series or article collection?                                                                                                                                                                                                                                                                                                                                                                                                | No                                                    |
| <b>Experimental design and statistics</b>                                                                                                                                                                                                                                                                                                                                                                                                                                    | Yes                                                   |
| <p>Full details of the experimental design and statistical methods used should be given in the Methods section, as detailed in our <a href="#">Minimum Standards Reporting Checklist</a>. Information essential to interpreting the data presented should be made available in the figure legends.</p> <p>Have you included all the information requested in your manuscript?</p>                                                                                            |                                                       |
| <b>Resources</b>                                                                                                                                                                                                                                                                                                                                                                                                                                                             | Yes                                                   |
| <p>A description of all resources used, including antibodies, cell lines, animals and software tools, with enough information to allow them to be uniquely identified, should be included in the Methods section. Authors are strongly encouraged to cite <a href="#">Research Resource Identifiers</a> (RRIDs) for antibodies, model organisms and tools, where possible.</p> <p>Have you included the information requested as detailed in our <a href="#">Minimum</a></p> |                                                       |

|                                                                                                                                                                                                                                                                                                                                                                                                                                                                                                                                                                                                                                               |                                                                                                                                                                                                                                                                                                                      |
|-----------------------------------------------------------------------------------------------------------------------------------------------------------------------------------------------------------------------------------------------------------------------------------------------------------------------------------------------------------------------------------------------------------------------------------------------------------------------------------------------------------------------------------------------------------------------------------------------------------------------------------------------|----------------------------------------------------------------------------------------------------------------------------------------------------------------------------------------------------------------------------------------------------------------------------------------------------------------------|
| <p><a href="#">Standards Reporting Checklist?</a></p>                                                                                                                                                                                                                                                                                                                                                                                                                                                                                                                                                                                         |                                                                                                                                                                                                                                                                                                                      |
| <p><b>Availability of data and materials</b></p> <p>All datasets and code on which the conclusions of the paper rely must be either included in your submission or deposited in <a href="#">publicly available repositories</a> (where available and ethically appropriate), referencing such data using a unique identifier in the references and in the “Availability of Data and Materials” section of your manuscript.</p> <p>Have you have met the above requirement as detailed in our <a href="#">Minimum Standards Reporting Checklist?</a></p>                                                                                       | <p>No</p>                                                                                                                                                                                                                                                                                                            |
| <p>If not, please give reasons for any omissions below.</p> <p>as follow-up to "<b>Availability of data and materials</b></p> <p>All datasets and code on which the conclusions of the paper rely must be either included in your submission or deposited in <a href="#">publicly available repositories</a> (where available and ethically appropriate), referencing such data using a unique identifier in the references and in the “Availability of Data and Materials” section of your manuscript.</p> <p>Have you have met the above requirement as detailed in our <a href="#">Minimum Standards Reporting Checklist?</a></p> <p>"</p> | <p>Access to the dataset can be sought via an application to the National COVID-19 Chest Imaging Database (NCCID) Data Access Committee as described on the NCCID website linked.</p> <p><a href="https://nhsx.github.io/covid-chest-imaging-database/">https://nhsx.github.io/covid-chest-imaging-database/</a></p> |

```
This is pdfTeX, Version 3.14159265-2.6-1.40.21 (TeX Live 2020/W32TeX)
(preloaded format=pdflatex 2020.5.12) 25 OCT 2021 12:02
entering extended mode
  restricted \writel8 enabled.
  %&-line parsing enabled.
**main.tex
(./main.tex
LaTeX2e <2020-02-02> patch level 5
L3 programming layer <2020-05-05> (./oup-contemporary.cls
Document Class: oup-contemporary 2017/06/28, v1.1
(c:/TeXLive/2020/texmf-dist/tex/latex/base/article.cls
Document Class: article 2019/12/20 v1.41 Standard LaTeX document class
(c:/TeXLive/2020/texmf-dist/tex/latex/base/size10.clo
File: size10.clo 2019/12/20 v1.41 Standard LaTeX file (size option)
)
\c@part=\count167
\c@section=\count168
\c@subsection=\count169
\c@subsubsection=\count170
\c@paragraph=\count171
\c@subparagraph=\count172
\c@figure=\count173
\c@table=\count174
\abovecaptionskip=\skip47
\belowcaptionskip=\skip48
\bibindent=\dimen134
) (c:/TeXLive/2020/texmf-dist/tex/latex/base/inputenc.sty
Package: inputenc 2018/08/11 v1.3c Input encoding file
\inpenc@prehook=\toks15
\inpenc@posthook=\toks16
) (c:/TeXLive/2020/texmf-dist/tex/latex/base/fontenc.sty
Package: fontenc 2020/02/11 v2.0o Standard LaTeX package
) (c:/TeXLive/2020/texmf-dist/tex/generic/iftex/ifpdf.sty
Package: ifpdf 2019/10/25 v3.4 ifpdf legacy package. Use iftex instead.
(c:/TeXLive/2020/texmf-dist/tex/generic/iftex/iftex.sty
Package: iftex 2020/03/06 v1.0d TeX engine tests
)) (c:/TeXLive/2020/texmf-dist/tex/latex/microtype/microtype.sty
Package: microtype 2019/11/18 v2.7d Micro-typographical refinements (RS)
(c:/TeXLive/2020/texmf-dist/tex/latex/graphics/keyval.sty
Package: keyval 2014/10/28 v1.15 key=value parser (DPC)
\KV@toks@=\toks17
)
\MT@toks=\toks18
\MT@count=\count175
LaTeX Info: Redefining \textls on input line 790.
\MT@outer@kern=\dimen135
LaTeX Info: Redefining \textmicrotypecontext on input line 1354.
\MT@listname@count=\count176
(c:/TeXLive/2020/texmf-dist/tex/latex/microtype/microtype-pdftex.def
File: microtype-pdftex.def 2019/11/18 v2.7d Definitions specific to
pdftex (RS)

LaTeX Info: Redefining \lsstyle on input line 914.
LaTeX Info: Redefining \slig on input line 914.
```

```

\MT@outer@space=\skip49
)
Package microtype Info: Loading configuration file microtype.cfg.
(c:/TeXLive/2020/texmf-dist/tex/latex/microtype/microtype.cfg
File: microtype.cfg 2019/11/18 v2.7d microtype main configuration file
(RS)
)) (c:/TeXLive/2020/texmf-dist/tex/latex/euler/euler.sty
Package: euler 1995/03/05 v2.5
Package: `euler' v2.5 <1995/03/05> (FJ and FMi)
LaTeX Font Info: Redeclaring symbol font `letters' on input line 35.
LaTeX Font Info: Encoding `OML' has changed to `U' for symbol font
(Font) `letters' in the math version `normal' on input line
35.
LaTeX Font Info: Overwriting symbol font `letters' in version `normal'
(Font) OML/cmm/m/it --> U/eur/m/n on input line 35.
LaTeX Font Info: Encoding `OML' has changed to `U' for symbol font
(Font) `letters' in the math version `bold' on input line
35.
LaTeX Font Info: Overwriting symbol font `letters' in version `bold'
(Font) OML/cmm/b/it --> U/eur/m/n on input line 35.
LaTeX Font Info: Overwriting symbol font `letters' in version `bold'
(Font) U/eur/m/n --> U/eur/b/n on input line 36.
LaTeX Font Info: Redeclaring math symbol \Gamma on input line 47.
LaTeX Font Info: Redeclaring math symbol \Delta on input line 48.
LaTeX Font Info: Redeclaring math symbol \Theta on input line 49.
LaTeX Font Info: Redeclaring math symbol \Lambda on input line 50.
LaTeX Font Info: Redeclaring math symbol \Xi on input line 51.
LaTeX Font Info: Redeclaring math symbol \Pi on input line 52.
LaTeX Font Info: Redeclaring math symbol \Sigma on input line 53.
LaTeX Font Info: Redeclaring math symbol \Upsilon on input line 54.
LaTeX Font Info: Redeclaring math symbol \Phi on input line 55.
LaTeX Font Info: Redeclaring math symbol \Psi on input line 56.
LaTeX Font Info: Redeclaring math symbol \Omega on input line 57.
\symEulerFraktur=\mathgroup4
LaTeX Font Info: Overwriting symbol font `EulerFraktur' in version
`bold'
(Font) U/euf/m/n --> U/euf/b/n on input line 63.
LaTeX Info: Redefining \oldstylenums on input line 85.
\symEulerScript=\mathgroup5
LaTeX Font Info: Overwriting symbol font `EulerScript' in version
`bold'
(Font) U/eus/m/n --> U/eus/b/n on input line 93.
LaTeX Font Info: Redeclaring math symbol \aleph on input line 97.
LaTeX Font Info: Redeclaring math symbol \Re on input line 98.
LaTeX Font Info: Redeclaring math symbol \Im on input line 99.
LaTeX Font Info: Redeclaring math delimiter \vert on input line 101.
LaTeX Font Info: Redeclaring math delimiter \backslash on input line
103.
LaTeX Font Info: Redeclaring math symbol \neg on input line 106.
LaTeX Font Info: Redeclaring math symbol \wedge on input line 108.
LaTeX Font Info: Redeclaring math symbol \vee on input line 110.
LaTeX Font Info: Redeclaring math symbol \setminus on input line 112.
LaTeX Font Info: Redeclaring math symbol \sim on input line 113.
LaTeX Font Info: Redeclaring math symbol \mid on input line 114.

```

LaTeX Font Info: Redefining math delimiter  $\arrowvert$  on input line 116.

LaTeX Font Info: Redefining math symbol  $\mathsection$  on input line 117.

$\symEulerExtension=\mathgroup6$

LaTeX Font Info: Redefining math symbol  $\coprod$  on input line 125.

LaTeX Font Info: Redefining math symbol  $\prod$  on input line 125.

LaTeX Font Info: Redefining math symbol  $\sum$  on input line 125.

LaTeX Font Info: Redefining math symbol  $\intop$  on input line 130.

LaTeX Font Info: Redefining math symbol  $\ointop$  on input line 131.

LaTeX Font Info: Redefining math symbol  $\braceld$  on input line 132.

LaTeX Font Info: Redefining math symbol  $\bracerd$  on input line 133.

LaTeX Font Info: Redefining math symbol  $\bracelu$  on input line 134.

LaTeX Font Info: Redefining math symbol  $\braceru$  on input line 135.

LaTeX Font Info: Redefining math symbol  $\infty$  on input line 136.

LaTeX Font Info: Redefining math symbol  $\nearrow$  on input line 153.

LaTeX Font Info: Redefining math symbol  $\searrow$  on input line 154.

LaTeX Font Info: Redefining math symbol  $\nrightarrow$  on input line 155.

LaTeX Font Info: Redefining math symbol  $\swarrow$  on input line 156.

LaTeX Font Info: Redefining math symbol  $\Leftrightarrow$  on input line 157.

LaTeX Font Info: Redefining math symbol  $\Leftarrow$  on input line 158.

LaTeX Font Info: Redefining math symbol  $\Rightarrow$  on input line 159.

LaTeX Font Info: Redefining math symbol  $\leftrightharpoonup$  on input line 160.

LaTeX Font Info: Redefining math symbol  $\leftarrow$  on input line 161.

LaTeX Font Info: Redefining math symbol  $\rightarrow$  on input line 163.

LaTeX Font Info: Redefining math delimiter  $\uparrow$  on input line 166.

LaTeX Font Info: Redefining math delimiter  $\downarrow$  on input line 168.

LaTeX Font Info: Redefining math delimiter  $\updownarrow$  on input line 170.

LaTeX Font Info: Redefining math delimiter  $\Uparrow$  on input line 172.

LaTeX Font Info: Redefining math delimiter  $\Downarrow$  on input line 174.

LaTeX Font Info: Redefining math delimiter  $\Updownarrow$  on input line 176.

LaTeX Font Info: Redefining math symbol  $\leftharpoonup$  on input line 177.

LaTeX Font Info: Redefining math symbol  $\leftharpoondown$  on input line 178.

LaTeX Font Info: Redefining math symbol  $\rightharpoonup$  on input line 179.

LaTeX Font Info: Redefining math symbol  $\rightharpoondown$  on input line 180.

.

LaTeX Font Info: Redefining math delimiter  $\lbrace$  on input line 182.

LaTeX Font Info: Redefining math delimiter  $\rbrace$  on input line 184.

$\symcmmigroup=\mathgroup7$

```

LaTeX Font Info: Overwriting symbol font `cmmigroup' in version `bold'
(Font) OML/cmm/m/it --> OML/cmm/b/it on input line 200.
LaTeX Font Info: Redefining math accent \vec on input line 201.
LaTeX Font Info: Redefining math symbol \triangleleft on input line
202.
LaTeX Font Info: Redefining math symbol \triangleright on input line
203.
LaTeX Font Info: Redefining math symbol \star on input line 204.
LaTeX Font Info: Redefining math symbol \lhook on input line 205.
LaTeX Font Info: Redefining math symbol \rhook on input line 206.
LaTeX Font Info: Redefining math symbol \flat on input line 207.
LaTeX Font Info: Redefining math symbol \natural on input line 208.
LaTeX Font Info: Redefining math symbol \sharp on input line 209.
LaTeX Font Info: Redefining math symbol \smile on input line 210.
LaTeX Font Info: Redefining math symbol \frown on input line 211.
LaTeX Font Info: Redefining math accent \grave on input line 245.
LaTeX Font Info: Redefining math accent \acute on input line 246.
LaTeX Font Info: Redefining math accent \tilde on input line 247.
LaTeX Font Info: Redefining math accent \ddot on input line 248.
LaTeX Font Info: Redefining math accent \check on input line 249.
LaTeX Font Info: Redefining math accent \breve on input line 250.
LaTeX Font Info: Redefining math accent \bar on input line 251.
LaTeX Font Info: Redefining math accent \dot on input line 252.
LaTeX Font Info: Redefining math accent \hat on input line 254.
) (c:/TeXLive/2020/texmf-dist/tex/latex/merriweather/merriweather.sty
Package: merriweather 2019/10/13 (Bob Tennent) Supports
Merriweather(Sans) font
s for all LaTeX engines.
(c:/TeXLive/2020/texmf-dist/tex/generic/iftex/ifxetex.sty
Package: ifxetex 2019/10/25 v0.7 ifxetex legacy package. Use iftex
instead.
) (c:/TeXLive/2020/texmf-dist/tex/generic/iftex/ifluatex.sty
Package: ifluatex 2019/10/25 v1.5 ifluatex legacy package. Use iftex
instead.
) (c:/TeXLive/2020/texmf-dist/tex/latex/base/textcomp.sty
Package: textcomp 2020/02/02 v2.0n Standard LaTeX package
) (c:/TeXLive/2020/texmf-dist/tex/latex/xkeyval/xkeyval.sty
Package: xkeyval 2014/12/03 v2.7a package option processing (HA)
(c:/TeXLive/2020/texmf-dist/tex/generic/xkeyval/xkeyval.tex
(c:/TeXLive/2020/te
xmf-dist/tex/generic/xkeyval/xkvutils.tex
\XKV@toks=\toks19
\XKV@tempa@toks=\toks20
)
\XKV@depth=\count177
File: xkeyval.tex 2014/12/03 v2.7a key=value parser (HA)
)) (c:/TeXLive/2020/texmf-dist/tex/latex/base/fontenc.sty
Package: fontenc 2020/02/11 v2.0o Standard LaTeX package
) (c:/TeXLive/2020/texmf-dist/tex/latex/fontaxes/fontaxes.sty
Package: fontaxes 2014/03/23 v1.0d Font selection axes
LaTeX Info: Redefining \upshape on input line 29.
LaTeX Info: Redefining \itshape on input line 31.
LaTeX Info: Redefining \slshape on input line 33.
LaTeX Info: Redefining \swshape on input line 35.

```

LaTeX Info: Redefining \scshape on input line 37.  
 LaTeX Info: Redefining \sscshape on input line 39.  
 LaTeX Info: Redefining \ulcshape on input line 41.  
 LaTeX Info: Redefining \textsw on input line 47.  
 LaTeX Info: Redefining \textssc on input line 48.  
 LaTeX Info: Redefining \textulc on input line 49.  
 )) (c:/TeXLive/2020/texmf-dist/tex/latex/mathastext/mathastext.sty  
 Package: mathastext 2019/11/16 v1.3w Use the text font in math mode (JFB)  
 \mst@exists@muskip=\muskip16  
 \mst@forall@muskip=\muskip17  
 \mst@prime@muskip=\muskip18  
 \mst@do@nonletters=\toks21  
 \mst@do@easynonletters=\toks22  
 \mst@do@az=\toks23  
 \mst@do@AZ=\toks24  
 \symmoperatorfont=\mathgroup8  
 \symmletterfont=\mathgroup9  
 \*\* ! and ?  
 \*\* punctuation: , . : ; and \colon  
 LaTeX Info: Redefining \relbar on input line 787.  
 LaTeX Info: Redefining \rightarrowfill on input line 790.  
 LaTeX Info: Redefining \leftarrowfill on input line 795.  
 \*\* + and =  
 LaTeX Info: Redefining \Relbar on input line 886.  
 \*\* adding = ; and + to \nfss@catcodes  
 \*\* parentheses ( ) [ ] and slash /  
 \*\* alldelims: < > \backslash \setminus | \vert \mid \{ and \}  
 LaTeX Font Info: Redeclaring math delimiter \backslash on input line  
 932.  
 LaTeX Font Info: Redeclaring math symbol \setminus on input line 944.  
 LaTeX Info: Redefining \models on input line 953.  
 \*\* \# \mathdollar \% \&  
 \*\* \imath and \jmath  
 LaTeX Font Info: Overwriting math alphabet '\mathnormalbold' in  
 version 'normal'  
 (Font) T1/Merriweather-OsF/b/it --> T1/Merriweather-  
 OsF/b/it o  
 n input line 2140.  
 LaTeX Font Info: Overwriting math alphabet '\mathnormalbold' in  
 version 'bold'  
 d'  
 (Font) T1/Merriweather-OsF/b/it --> T1/Merriweather-  
 OsF/b/it o  
 n input line 2140.  
 LaTeX Font Info: Overwriting symbol font 'mtletterfont' in version  
 'normal'  
 (Font) T1/Merriweather-OsF/m/it --> T1/Merriweather-  
 OsF/m/it o  
 n input line 2140.  
 LaTeX Font Info: Overwriting symbol font 'mtletterfont' in version  
 'bold'  
 (Font) T1/Merriweather-OsF/m/it --> T1/Merriweather-  
 OsF/b/it o



```

n input line 2140.
LaTeX Font Info: Overwriting symbol font `moperatorfont' in version
`normal'
,
(Font) T1/Merriweather-OsF/m/n --> T1/Merriweather-
OsF/m/n on
input line 2140.
LaTeX Font Info: Overwriting symbol font `moperatorfont' in version
`bold'
(Font) T1/Merriweather-OsF/m/n --> T1/Merriweather-
OsF/b/n on
input line 2140.
LaTeX Font Info: Overwriting math alphabet `Mathbf' in version
`normal'
(Font) T1/Merriweather-OsF/b/n --> T1/Merriweather-
OsF/b/n on
input line 2140.
LaTeX Font Info: Overwriting math alphabet `Mathbf' in version `bold'
(Font) T1/Merriweather-OsF/b/n --> T1/Merriweather-
OsF/b/n on
input line 2140.
LaTeX Font Info: Overwriting math alphabet `Mathit' in version
`normal'
(Font) T1/Merriweather-OsF/m/it --> T1/Merriweather-
OsF/m/it o
n input line 2140.
LaTeX Font Info: Overwriting math alphabet `Mathit' in version `bold'
(Font) T1/Merriweather-OsF/m/it --> T1/Merriweather-
OsF/b/it o
n input line 2140.
LaTeX Font Info: Overwriting math alphabet `Mathsf' in version
`normal'
(Font) T1/MerriweatherSans-OsF/m/n -->
T1/MerriweatherSans-OsF
/m/n on input line 2140.
LaTeX Font Info: Overwriting math alphabet `Mathsf' in version `bold'
(Font) T1/MerriweatherSans-OsF/m/n -->
T1/MerriweatherSans-OsF
/b/n on input line 2140.
LaTeX Font Info: Overwriting math alphabet `Mathtt' in version
`normal'
(Font) T1/lmtt/m/n --> T1/lmtt/m/n on input line 2140.
LaTeX Font Info: Overwriting math alphabet `Mathtt' in version `bold'
(Font) T1/lmtt/m/n --> T1/lmtt/b/n on input line 2140.
** Latin letters in the normal (resp. bold) math versions are now
** set up to use the fonts T1/Merriweather-OsF/m(b)/it
** Other characters (digits, ...) and \log-like names will be
** typeset with the n shape.
** \hbar
** minus as endash
** \HUGE has been (re)-defined.
** mathastext has declared larger sizes for subscripts.
** To keep LaTeX defaults, use option `defaultmathsizes'.
) (c:/TeXLive/2020/texmf-dist/tex/latex/relsize/relsize.sty

```

```

Package: relsize 2013/03/29 ver 4.1
) (c:/TeXLive/2020/texmf-dist/tex/latex/ragged2e/ragged2e.sty
Package: ragged2e 2019/07/28 v2.2 ragged2e Package (MS)
(c:/TeXLive/2020/texmf-dist/tex/latex/ms/everyysel.sty
Package: everyysel 2011/10/28 v1.2 EverySelectfont Package (MS)
)
\CenteringLeftskip=\skip50
\RaggedLeftLeftskip=\skip51
\RaggedRightLeftskip=\skip52
\CenteringRightskip=\skip53
\RaggedLeftRightskip=\skip54
\RaggedRightRightskip=\skip55
\CenteringParfillskip=\skip56
\RaggedLeftParfillskip=\skip57
\RaggedRightParfillskip=\skip58
\JustifyingParfillskip=\skip59
\CenteringParindent=\skip60
\RaggedLeftParindent=\skip61
\RaggedRightParindent=\skip62
\JustifyingParindent=\skip63
) (c:/TeXLive/2020/texmf-dist/tex/latex/xcolor/xcolor.sty
Package: xcolor 2016/05/11 v2.12 LaTeX color extensions (UK)
(c:/TeXLive/2020/texmf-dist/tex/latex/graphics-cfg/color.cfg
File: color.cfg 2016/01/02 v1.6 sample color configuration
)
Package xcolor Info: Driver file: pdftex.def on input line 225.
(c:/TeXLive/2020/texmf-dist/tex/latex/graphics-def/pdftex.def
File: pdftex.def 2018/01/08 v1.01 Graphics/color driver for pdftex
)
Package xcolor Info: Model `cmy' substituted by `cmy0' on input line
1348.
Package xcolor Info: Model `hsb' substituted by `rgb' on input line 1352.
Package xcolor Info: Model `RGB' extended on input line 1364.
Package xcolor Info: Model `HTML' substituted by `rgb' on input line
1366.
Package xcolor Info: Model `Hsb' substituted by `hsb' on input line 1367.
Package xcolor Info: Model `tHsb' substituted by `hsb' on input line
1368.
Package xcolor Info: Model `HSB' substituted by `hsb' on input line 1369.
Package xcolor Info: Model `Gray' substituted by `gray' on input line
1370.
Package xcolor Info: Model `wave' substituted by `hsb' on input line
1371.
) (c:/TeXLive/2020/texmf-dist/tex/latex/colortbl/colortbl.sty
Package: colortbl 2020/01/04 v1.0e Color table columns (DPC)
(c:/TeXLive/2020/texmf-dist/tex/latex/tools/array.sty
Package: array 2019/08/31 v2.41 Tabular extension package (FMi)
\col@sep=\dimen136
\ar@mcellbox=\box45
\extrarowheight=\dimen137
\NC@list=\toks25
\extratabsurround=\skip64
\backup@length=\skip65
\ar@cellbox=\box46

```

```

)
\everycr=\toks26
\minrowclearance=\skip66
) (c:/TeXLive/2020/texmf-dist/tex/latex/graphics/graphicx.sty
Package: graphicx 2019/11/30 v1.2a Enhanced LaTeX Graphics (DPC,SPQR)
(c:/TeXLive/2020/texmf-dist/tex/latex/graphics/graphics.sty
Package: graphics 2019/11/30 v1.4a Standard LaTeX Graphics (DPC,SPQR)
(c:/TeXLive/2020/texmf-dist/tex/latex/graphics/trig.sty
Package: trig 2016/01/03 v1.10 sin cos tan (DPC)
) (c:/TeXLive/2020/texmf-dist/tex/latex/graphics-cfg/graphics.cfg
File: graphics.cfg 2016/06/04 v1.11 sample graphics configuration
)
Package graphics Info: Driver file: pdftex.def on input line 105.
)
\Gin@req@height=\dimen138
\Gin@req@width=\dimen139
) (c:/TeXLive/2020/texmf-dist/tex/latex/etoolbox/etoolbox.sty
Package: etoolbox 2019/09/21 v2.5h e-TeX tools for LaTeX (JAW)
\etb@tempcnta=\count178
) (c:/TeXLive/2020/texmf-dist/tex/latex/xpatch/xpatch.sty
(c:/TeXLive/2020/texm
f-dist/tex/latex/l3kernel/expl3.sty
Package: expl3 2020-05-05 L3 programming layer (loader)
(c:/TeXLive/2020/texmf-dist/tex/latex/l3backend/l3backend-pdfmode.def
File: l3backend-pdfmode.def 2020-05-05 L3 backend support: PDF mode
\l__kernel_color_stack_int=\count179
\l__pdf_internal_box=\box47
))
Package: xpatch 2020/03/25 v0.3a Extending etoolbox patching commands
(c:/TeXLive/2020/texmf-dist/tex/latex/l3packages/xparse/xparse.sty
Package: xparse 2020-03-06 L3 Experimental document command parser
\l__xparse_current_arg_int=\count180
\g__xparse_grabber_int=\count181
\l__xparse_m_args_int=\count182
\l__xparse_v_nesting_int=\count183
)) (c:/TeXLive/2020/texmf-dist/tex/latex/environ/environ.sty
Package: environ 2014/05/04 v0.3 A new way to define environments
(c:/TeXLive/2020/texmf-dist/tex/latex/trimspaces/trimspaces.sty
Package: trimspaces 2009/09/17 v1.1 Trim spaces around a token list
)
\@envbody=\toks27
) (c:/TeXLive/2020/texmf-dist/tex/latex/lastpage/lastpage.sty
Package: lastpage 2015/03/29 v1.2m Refers to last page's name (HMM; JPG)
) (c:/TeXLive/2020/texmf-dist/tex/latex/graphics/rotating.sty
Package: rotating 2016/08/11 v2.16d rotated objects in LaTeX
(c:/TeXLive/2020/texmf-dist/tex/latex/base/ifthen.sty
Package: ifthen 2014/09/29 v1.1c Standard LaTeX ifthen package (DPC)
)
\c@r@tfl@t=\count184
\rotFPtop=\skip67
\rotFPbot=\skip68
\rot@float@box=\box48
\rot@mess@toks=\toks28
) (c:/TeXLive/2020/texmf-dist/tex/latex/graphics/lscap.sty

```

```

Package: lscapc 2000/10/22 v3.01 Landscape Pages (DPC)
) (c:/TeXLive/2020/texmf-dist/tex/latex/tools/afterpage.sty
Package: afterpage 2014/10/28 v1.08 After-Page Package (DPC)
\AP@output=\toks29
\AP@partial=\box49
\AP@footins=\box50
) (c:/TeXLive/2020/texmf-dist/tex/latex/textpos/textpos.sty
Package: textpos 2019/04/15 v1.9.1
Package: textpos 2019/04/15 1.9.1, absolute positioning of text on the
page
(c:/TeXLive/2020/texmf-dist/tex/latex/ms/everyshi.sty
Package: everyshi 2001/05/15 v3.00 EveryShipout Package (MS)
)
\TP@textbox=\box51
\TP@holdbox=\box52
\TPHorizModule=\dimen140
\TPVertModule=\dimen141
\TP@margin=\dimen142
\TP@absmargin=\dimen143
Grid set 16 x 16 = 37.34424pt x 52.81541pt
\TPboxrulesize=\dimen144
\TP@ox=\dimen145
\TP@oy=\dimen146
\TP@tbargs=\toks30
\TP@prevdepth=\dimen147
TextBlockOrigin set to 0pt x 0pt
) (c:/TeXLive/2020/texmf-dist/tex/latex/url/url.sty
\Urlmuskip=\muskip19
Package: url 2013/09/16 ver 3.4 Verb mode for urls, etc.
) (c:/TeXLive/2020/texmf-dist/tex/latex/newfloat/newfloat.sty
Package: newfloat 2019/09/02 v1.11 Defining new floating environments
(AR)
Package newfloat Info: `rotating' package detected.
) (c:/TeXLive/2020/texmf-dist/tex/latex/mdframed/mdframed.sty
Package: mdframed 2013/07/01 1.9b: mdframed
(c:/TeXLive/2020/texmf-dist/tex/latex/kvoptions/kvoptions.sty
Package: kvoptions 2019/11/29 v3.13 Key value format for package options
(HO)
(c:/TeXLive/2020/texmf-dist/tex/generic/ltxcmds/ltxcmds.sty
Package: ltxcmds 2019/12/15 v1.24 LaTeX kernel commands for general use
(HO)
) (c:/TeXLive/2020/texmf-dist/tex/generic/kvsetkeys/kvsetkeys.sty
Package: kvsetkeys 2019/12/15 v1.18 Key value parser (HO)
)) (c:/TeXLive/2020/texmf-dist/tex/latex/zref/zref-abspage.sty
Package: zref-abspage 2020-03-03 v2.29 Module abspage for zref (HO)
(c:/TeXLive/2020/texmf-dist/tex/latex/zref/zref-base.sty
Package: zref-base 2020-03-03 v2.29 Module base for zref (HO)
(c:/TeXLive/2020/texmf-dist/tex/generic/infwarerr/infwarerr.sty
Package: infwarerr 2019/12/03 v1.5 Providing info/warning/error messages
(HO)
) (c:/TeXLive/2020/texmf-dist/tex/generic/kvdefinekeys/kvdefinekeys.sty
Package: kvdefinekeys 2019-12-19 v1.6 Define keys (HO)
) (c:/TeXLive/2020/texmf-dist/tex/latex/pdftexcmds/pdftexcmds.sty

```

```
Package: pdftexcmds 2019/11/24 v0.31 Utility functions of pdfTeX for
LuaTeX (HO
)
Package pdftexcmds Info: \pdf@primitive is available.
Package pdftexcmds Info: \pdf@ifprimitive is available.
Package pdftexcmds Info: \pdfdraftmode found.
) (c:/TeXLive/2020/texmf-dist/tex/generic/etexcmds/etexcmds.sty
Package: etexcmds 2019/12/15 v1.7 Avoid name clashes with e-TeX commands
(HO)
) (c:/TeXLive/2020/texmf-dist/tex/latex/auxhook/auxhook.sty
Package: auxhook 2019-12-17 v1.6 Hooks for auxiliary files (HO)
)
Package zref Info: New property list: main on input line 763.
Package zref Info: New property: default on input line 764.
Package zref Info: New property: page on input line 765.
) (c:/TeXLive/2020/texmf-dist/tex/generic/atbegshi/atbegshi.sty
Package: atbegshi 2019/12/05 v1.19 At begin shipout hook (HO)
)
\c@abspage=\count185
Package zref Info: New property: abspage on input line 66.
) (c:/TeXLive/2020/texmf-dist/tex/latex/needspace/needspace.sty
Package: needspace 2010/09/12 v1.3d reserve vertical space
)
\mdf@templength=\skip69
\c@mdf@globalstyle@cnt=\count186
\mdf@skipabove@length=\skip70
\mdf@skipbelow@length=\skip71
\mdf@leftmargin@length=\skip72
\mdf@rightmargin@length=\skip73
\mdf@innerleftmargin@length=\skip74
\mdf@innerrightmargin@length=\skip75
\mdf@innertopmargin@length=\skip76
\mdf@innerbottommargin@length=\skip77
\mdf@splittopskip@length=\skip78
\mdf@splitbottomskip@length=\skip79
\mdf@outermargin@length=\skip80
\mdf@innermargin@length=\skip81
\mdf@linewidth@length=\skip82
\mdf@innerlinewidth@length=\skip83
\mdf@middlelinewidth@length=\skip84
\mdf@outerlinewidth@length=\skip85
\mdf@roundcorner@length=\skip86
\mdf@footnotedistance@length=\skip87
\mdf@userdefinedwidth@length=\skip88
\mdf@needspace@length=\skip89
\mdf@frametitleaboveskip@length=\skip90
\mdf@frametitlebelowskip@length=\skip91
\mdf@frametitulerulewidth@length=\skip92
\mdf@frametitleleftmargin@length=\skip93
\mdf@frametitlerightmargin@length=\skip94
\mdf@shadowsize@length=\skip95
\mdf@extratopheight@length=\skip96
\mdf@subtitleabovelinewidth@length=\skip97
\mdf@subtitlebelowlinewidth@length=\skip98
```

```

\mdf@subtitleaboveskip@length=\skip99
\mdf@subtitledelowskip@length=\skip100
\mdf@subtitleinneraboveskip@length=\skip101
\mdf@subtitleinnerbelowskip@length=\skip102
\mdf@subsubtitelabelinewidth@length=\skip103
\mdf@subsubtitelabelinewidth@length=\skip104
\mdf@subsubtitelabelaboveskip@length=\skip105
\mdf@subsubtitelabelbelowskip@length=\skip106
\mdf@subsubtitelabelinneraboveskip@length=\skip107
\mdf@subsubtitelabelinnerbelowskip@length=\skip108
(c:/TeXLive/2020/texmf-dist/tex/latex/mdframed/md-frame-0.mdf
File: md-frame-0.mdf 2013/07/01\ 1.9b: md-frame-0
)
\mdf@frametitlebox=\box53
\mdf@footnotebox=\box54
\mdf@splitbox@one=\box55
\mdf@splitbox@two=\box56
\mdf@splitbox@save=\box57
\mdf@splitboxwidth=\skip109
\mdf@splitboxtotalwidth=\skip110
\mdf@splitboxheight=\skip111
\mdf@splitboxdepth=\skip112
\mdf@splitboxtotalheight=\skip113
\mdf@frametitleboxwidth=\skip114
\mdf@frametitleboxtotalwidth=\skip115
\mdf@frametitleboxheight=\skip116
\mdf@frametitleboxdepth=\skip117
\mdf@frametitleboxtotalheight=\skip118
\mdf@footnoteboxwidth=\skip119
\mdf@footnoteboxtotalwidth=\skip120
\mdf@footnoteboxheight=\skip121
\mdf@footnoteboxdepth=\skip122
\mdf@footnoteboxtotalheight=\skip123
\mdf@totallinewidth=\skip124
\mdf@boundingboxwidth=\skip125
\mdf@boundingboxtotalwidth=\skip126
\mdf@boundingboxheight=\skip127
\mdf@boundingboxdepth=\skip128
\mdf@boundingboxtotalheight=\skip129
\mdf@freevspace@length=\skip130
\mdf@horizontalwidthofbox@length=\skip131
\mdf@verticalmarginwhole@length=\skip132
\mdf@horizontalsofbox=\skip133
\mdf@subtitleheight=\skip134
\mdf@subsubtitelheight=\skip135
\c@mdfcountframes=\count187

***** mdframed patching \endmdf@trivlist

***** -- success*****

\mdf@envdepth=\count188
\c@mdf@env@i=\count189
\c@mdf@env@ii=\count190

```

```
\c@mdf@zref@counter=\count191
Package zref Info: New property: mdf@pagevalue on input line 895.
) (c:/TeXLive/2020/texmf-dist/tex/latex/titlesec/titlesec.sty
Package: titlesec 2019/10/16 v2.13 Sectioning titles
\ttl@box=\box58
\beforetitleunit=\skip136
\aftertitleunit=\skip137
\ttl@plus=\dimen148
\ttl@minus=\dimen149
\ttl@toksa=\toks31
\titlewidth=\dimen150
\titlewidthlast=\dimen151
\titlewidthfirst=\dimen152
) (c:/TeXLive/2020/texmf-dist/tex/latex/koma-script/scrextend.sty
Package: scrextend 2020/04/19 v3.30 KOMA-Script package (extend other
classes w
ith features of KOMA-Script classes)
(c:/TeXLive/2020/texmf-dist/tex/latex/koma-script/scrkbase.sty
Package: scrkbase 2020/04/19 v3.30 KOMA-Script package (KOMA-Script-
dependent b
asics and keyval usage)
(c:/TeXLive/2020/texmf-dist/tex/latex/koma-script/scrbase.sty
Package: scrbase 2020/04/19 v3.30 KOMA-Script package (KOMA-Script-
independent
basics and keyval usage)
(c:/TeXLive/2020/texmf-dist/tex/latex/koma-script/scrlfile.sty
Package: scrlfile 2020/04/19 v3.30 KOMA-Script package (loading files)
)))
Package scrextend Info: unexpected definition of ` \@makefnmark'.
(scrextend) Trying to patch it on input line 1589.
Package scrextend Info: patch seems to be successfull on input line 1589.
)
```

```
LaTeX Font Warning: Font shape `T1/cmr/m/n' in size <7.5> not available
(Font) size <7> substituted on input line 65.
```

```
(c:/TeXLive/2020/texmf-dist/tex/latex/tools/calc.sty
Package: calc 2017/05/25 v4.3 Infix arithmetic (KKT,FJ)
\calc@Acount=\count192
\calc@Bcount=\count193
\calc@Adimen=\dimen153
\calc@Bdimen=\dimen154
\calc@Askip=\skip138
\calc@Bskip=\skip139
LaTeX Info: Redefining \setlength on input line 80.
LaTeX Info: Redefining \addtolength on input line 81.
\calc@Ccount=\count194
\calc@Cskip=\skip140
) (c:/TeXLive/2020/texmf-dist/tex/latex/geometry/geometry.sty
Package: geometry 2020/01/02 v5.9 Page Geometry
(c:/TeXLive/2020/texmf-dist/tex/generic/iftex/ifvtex.sty
Package: ifvtex 2019/10/25 v1.7 ifvtex legacy package. Use iftex instead.
)
\Gm@cnth=\count195
```

```

\Gm@cntv=\count196
\c@Gm@tempcnt=\count197
\Gm@bindingoffset=\dimen155
\Gm@wd@mp=\dimen156
\Gm@odd@mp=\dimen157
\Gm@even@mp=\dimen158
\Gm@layoutwidth=\dimen159
\Gm@layoutheight=\dimen160
\Gm@layouthoffset=\dimen161
\Gm@layoutvoffset=\dimen162
\Gm@dimlist=\toks32
) (c:/TeXLive/2020/texmf-dist/tex/latex/hyperref/hyperref.sty
Package: hyperref 2020/01/14 v7.00d Hypertext links for LaTeX
(c:/TeXLive/2020/texmf-dist/tex/generic/pdfescape/pdfescape.sty
Package: pdfescape 2019/12/09 v1.15 Implements pdfTeX's escape features
(HO)
) (c:/TeXLive/2020/texmf-dist/tex/latex/hycolor/hycolor.sty
Package: hycolor 2020-01-27 v1.10 Color options for hyperref/bookmark
(HO)
) (c:/TeXLive/2020/texmf-dist/tex/latex/letltxmacro/letltxmacro.sty
Package: letltxmacro 2019/12/03 v1.6 Let assignment for LaTeX macros (HO)
)
\@linkdim=\dimen163
\Hy@linkcounter=\count198
\Hy@pagecounter=\count199
(c:/TeXLive/2020/texmf-dist/tex/latex/hyperref/pd1enc.def
File: pd1enc.def 2020/01/14 v7.00d Hyperref: PDFDocEncoding definition
(HO)
Now handling font encoding PD1 ...
... no UTF-8 mapping file for font encoding PD1
) (c:/TeXLive/2020/texmf-dist/tex/generic/intcalc/intcalc.sty
Package: intcalc 2019/12/15 v1.3 Expandable calculations with integers
(HO)
)
\Hy@SavedSpaceFactor=\count266
Package hyperref Info: Option `colorlinks' set `true' on input line 4421.
Package hyperref Info: Hyper figures OFF on input line 4547.
Package hyperref Info: Link nesting OFF on input line 4552.
Package hyperref Info: Hyper index ON on input line 4555.
Package hyperref Info: Plain pages OFF on input line 4562.
Package hyperref Info: Backreferencing OFF on input line 4567.
Package hyperref Info: Implicit mode ON; LaTeX internals redefined.
Package hyperref Info: Bookmarks ON on input line 4800.
\c@Hy@tempcnt=\count267
LaTeX Info: Redefining \url on input line 5159.
\XeTeXLinkMargin=\dimen164
(c:/TeXLive/2020/texmf-dist/tex/generic/bitset/bitset.sty
Package: bitset 2019/12/09 v1.3 Handle bit-vector datatype (HO)
(c:/TeXLive/2020/texmf-dist/tex/generic/bigintcalc/bigintcalc.sty
Package: bigintcalc 2019/12/15 v1.5 Expandable calculations on big
integers (HO)
)
))
\Fld@menulength=\count268

```



```
\Field@Width=\dimen165
\Fld@charsize=\dimen166
Package hyperref Info: Hyper figures OFF on input line 6430.
Package hyperref Info: Link nesting OFF on input line 6435.
Package hyperref Info: Hyper index ON on input line 6438.
Package hyperref Info: backreferencing OFF on input line 6445.
Package hyperref Info: Link coloring ON on input line 6448.
Package hyperref Info: Link coloring with OCG OFF on input line 6455.
Package hyperref Info: PDF/A mode OFF on input line 6460.
LaTeX Info: Redefining \ref on input line 6500.
LaTeX Info: Redefining \pageref on input line 6504.
\Hy@abspage=\count269
\c@Item=\count270
\c@Hfootnote=\count271
)
Package hyperref Info: Driver (autodetected): hpdftex.
(c:/TeXLive/2020/texmf-dist/tex/latex/hyperref/hpdftex.def
File: hpdftex.def 2020/01/14 v7.00d Hyperref driver for pdfTeX
(c:/TeXLive/2020/texmf-dist/tex/latex/atveryend/atveryend.sty
Package: atveryend 2019-12-11 v1.11 Hooks at the very end of document
(HO)
)
\HyAnn@Count=\count272
\Fld@listcount=\count273
\c@bookmark@seq@number=\count274
(c:/TeXLive/2020/texmf-dist/tex/latex/rerunfilecheck/rerunfilecheck.sty
Package: rerunfilecheck 2019/12/05 v1.9 Rerun checks for auxiliary files
(HO)
(c:/TeXLive/2020/texmf-dist/tex/generic/uniquecounter/uniquecounter.sty
Package: uniquecounter 2019/12/15 v1.4 Provide unlimited unique counter
(HO)
)
Package uniquecounter Info: New unique counter `rerunfilecheck' on input
line 2
86.
)
\Hy@SectionHShift=\skip141
) (c:/TeXLive/2020/texmf-dist/tex/latex/preprint/authblk.sty
Package: authblk 2001/02/27 1.3 (PWD)
\affilsep=\skip142
\@affilsep=\skip143
\c@Maxaffil=\count275
\c@authors=\count276
\c@affil=\count277
) (c:/TeXLive/2020/texmf-dist/tex/latex/footmisc/footmisc.sty
Package: footmisc 2011/06/06 v5.5b a miscellany of footnote facilities
\FN@temptoken=\toks33
\footnotemargin=\dimen167
\c@pp@next@reset=\count278
Package footmisc Info: Declaring symbol style bringhurst on input line
855.
Package footmisc Info: Declaring symbol style chicago on input line 863.
Package footmisc Info: Declaring symbol style wiley on input line 872.
```

Package footmisc Info: Declaring symbol style lamport-robust on input line 883.

Package footmisc Info: Declaring symbol style lamport\* on input line 903.  
Package footmisc Info: Declaring symbol style lamport\*-robust on input line 924

.  
) (c:/TeXLive/2020/texmf-dist/tex/latex/fancyhdr/fancyhdr.sty  
Package: fancyhdr 2019/01/31 v3.10 Extensive control of page headers and footer

s  
\f@nch@headwidth=\skip144  
\f@nch@O@elh=\skip145  
\f@nch@O@erh=\skip146  
\f@nch@O@olh=\skip147  
\f@nch@O@orh=\skip148  
\f@nch@O@elf=\skip149  
\f@nch@O@erf=\skip150  
\f@nch@O@olf=\skip151  
\f@nch@O@orf=\skip152

) (c:/TeXLive/2020/texmf-dist/tex/generic/alphalph/alphalph.sty  
Package: alphalph 2019/12/09 v2.6 Convert numbers to letters (HO)  
)

\c@authorfn=\count279  
(c:/TeXLive/2020/texmf-dist/tex/latex/abstract/abstract.sty  
Package: abstract 2009/06/08 v1.2a configurable abstracts  
\abstitlekip=\skip153  
\absleftindent=\skip154  
\absrightindent=\skip155  
\absparindent=\skip156  
\absparsep=\skip157  
)

Package newfloat Info: New float `keypoints' with options  
`placement=t!,name=kp  
t' on input line 286.

\c@keypoints=\count280  
\newfloat@ftype=\count281  
Package newfloat Info: float type `keypoints'=8 on input line 286.

(c:/TeXLive/2020/texmf-dist/tex/latex/enumitem/enumitem.sty  
Package: enumitem 2019/06/20 v3.9 Customized lists

\labelindent=\skip158  
\enit@outerparindent=\dimen168  
\enit@toks=\toks34  
\enit@inbox=\box59  
\enit@count@id=\count282  
\enitdp@description=\count283

) (c:/TeXLive/2020/texmf-dist/tex/latex/quoting/quoting.sty  
Package: quoting 2014/01/28 v0.1c Consolidated environment for displayed text

\quo@toppartop=\skip159

) (c:/TeXLive/2020/texmf-dist/tex/latex/sttools/stfloats.sty  
Package: stfloats 2017/03/27 v3.3 Improve float mechanism and baselineskip settings

```

\@dblbotnum=\count284
\c@dblbotnumber=\count285
) (c:/TeXLive/2020/texmf-dist/tex/latex/booktabs/booktabs.sty
Package: booktabs 2020/01/12 v1.61803398 Publication quality tables
\heavyrulewidth=\dimen169
\lightrulewidth=\dimen170
\cmidrulewidth=\dimen171
\belowrulesep=\dimen172
\belowbottomsep=\dimen173
\aboverulesep=\dimen174
\abovetopsep=\dimen175
\cmidrulesep=\dimen176
\cmidrulekern=\dimen177
\defaultaddspace=\dimen178
\@cmidla=\count286
\@cmidlb=\count287
\@aboverulesep=\dimen179
\@belowrulesep=\dimen180
\@thisruleclass=\count288
\@lastruleclass=\count289
\@thisrulewidth=\dimen181
) (c:/TeXLive/2020/texmf-dist/tex/latex/tools/tabularx.sty
Package: tabularx 2020/01/15 v2.11c `tabularx' package (DPC)
\TX@col@width=\dimen182
\TX@old@table=\dimen183
\TX@old@col=\dimen184
\TX@target=\dimen185
\TX@delta=\dimen186
\TX@cols=\count290
\TX@ftn=\toks35
)
\enitdp@tablenotes=\count291
(c:/TeXLive/2020/texmf-dist/tex/latex/caption/caption.sty
Package: caption 2020/01/03 v3.4h Customizing captions (AR)
(c:/TeXLive/2020/texmf-dist/tex/latex/caption/caption3.sty
Package: caption3 2020/01/03 v1.8h caption3 kernel (AR)
Package caption3 Info: TeX engine: e-TeX on input line 61.
\captionmargin=\dimen187
\captionmargin@=\dimen188
\captionwidth=\dimen189
\caption@tempdima=\dimen190
\caption@indent=\dimen191
\caption@parindent=\dimen192
\caption@hangindent=\dimen193
Package caption Info: Standard document class detected.
)
\c@caption@flags=\count292
\c@continuedfloat=\count293
Package caption Info: hyperref package is loaded.
Package caption Info: rotating package is loaded.
) (c:/TeXLive/2020/texmf-dist/tex/latex/natbib/natbib.sty
Package: natbib 2010/09/13 8.31b (PWD, AO)
\bibhang=\skip160
\bibsep=\skip161

```

LaTeX Info: Redefining \cite on input line 694.  
\c@NAT@ctr=\count294  
)) (c:/TeXLive/2020/texmf-dist/tex/latex/amsmath/amsmath.sty  
Package: amsmath 2020/01/20 v2.17e AMS math features  
\@mathmargin=\skip162  
For additional information on amsmath, use the '?' option.  
(c:/TeXLive/2020/texmf-dist/tex/latex/amsmath/amstext.sty  
Package: amstext 2000/06/29 v2.01 AMS text  
(c:/TeXLive/2020/texmf-dist/tex/latex/amsmath/amsgen.sty  
File: amsgen.sty 1999/11/30 v2.0 generic functions  
\@emptytoks=\toks36  
\ex@=\dimen194  
)) (c:/TeXLive/2020/texmf-dist/tex/latex/amsmath/amsbsy.sty  
Package: amsbsy 1999/11/29 v1.2d Bold Symbols  
\pmbraise@=\dimen195  
) (c:/TeXLive/2020/texmf-dist/tex/latex/amsmath/amsopn.sty  
Package: amsopn 2016/03/08 v2.02 operator names  
)  
\inf@bad=\count295  
LaTeX Info: Redefining \frac on input line 227.  
\uproot@=\count296  
\leftroot@=\count297  
LaTeX Info: Redefining \overline on input line 389.  
\classnum@=\count298  
\DOTSCASE@=\count299  
LaTeX Info: Redefining \ldots on input line 486.  
LaTeX Info: Redefining \dots on input line 489.  
LaTeX Info: Redefining \cdots on input line 610.  
\Mathstrutbox@=\box60  
\strutbox@=\box61  
\big@size=\dimen196  
LaTeX Font Info: Redefining font encoding OML on input line 733.  
LaTeX Font Info: Redefining font encoding OMS on input line 734.  
\mac@depth=\count300  
\c@MaxMatrixCols=\count301  
\dotsspace@=\muskip20  
\c@parentequation=\count302  
\dspbrk@lvl=\count303  
\tag@help=\toks37  
\row@=\count304  
\column@=\count305  
\maxfields@=\count306  
\andhelp@=\toks38  
\eqnshift@=\dimen197  
\alignsep@=\dimen198  
\tagshift@=\dimen199  
\tagwidth@=\dimen256  
\totwidth@=\dimen257  
\lineht@=\dimen258  
\@envbody=\toks39  
\multlinegap=\skip163  
\multlinetaggap=\skip164  
\mathdisplay@stack=\toks40  
LaTeX Info: Redefining \[ on input line 2859.

```

LaTeX Info: Redefining \] on input line 2860.
) (c:/TeXLive/2020/texmf-dist/tex/latex/siunitx/siunitx.sty
Package: siunitx 2020/02/25 v2.8b A comprehensive (SI) units package
(c:/TeXLive/2020/texmf-dist/tex/latex/l3packages/l3keys2e/l3keys2e.sty
Package: l3keys2e 2020-03-06 LaTeX2e option processing using LaTeX3 keys
)
\l__siunitx_tmp_box=\box62
\l__siunitx_tmp_dim=\dimen259
\l__siunitx_tmp_int=\count307
\l__siunitx_number_mantissa_length_int=\count308
\l__siunitx_number_uncert_length_int=\count309
\l__siunitx_round_int=\count310
\l__siunitx_process_decimal_int=\count311
\l__siunitx_process_uncertainty_int=\count312
\l__siunitx_process_fixed_int=\count313
\l__siunitx_process_integer_min_int=\count314
\l__siunitx_process_precision_int=\count315
\l__siunitx_group_min_int=\count316
\l__siunitx_angle_marker_box=\box63
\l__siunitx_angle_unit_box=\box64
\l__siunitx_angle_marker_dim=\dimen260
\l__siunitx_angle_unit_dim=\dimen261
\l__siunitx_unit_int=\count317
\l__siunitx_unit_denominator_int=\count318
\l__siunitx_unit_numerator_int=\count319
\l__siunitx_unit_prefix_int=\count320
\l__siunitx_unit_prefix_base_int=\count321
\l__siunitx_unit_prefix_gram_int=\count322
\l__siunitx_number_product_int=\count323
\c__siunitx_one_fill_skip=\skip165
\l__siunitx_table_unit_align_skip=\skip166
\l__siunitx_table_exponent_dim=\dimen262
\l__siunitx_table_integer_dim=\dimen263
\l__siunitx_table_mantissa_dim=\dimen264
\l__siunitx_table_marker_dim=\dimen265
\l__siunitx_table_result_dim=\dimen266
\l__siunitx_table_uncert_dim=\dimen267
\l__siunitx_table_fill_pre_dim=\dimen268
\l__siunitx_table_fill_post_dim=\dimen269
\l__siunitx_table_fill_mid_dim=\dimen270
\l__siunitx_table_pre_box=\box65
\l__siunitx_table_post_box=\box66
\l__siunitx_table_mantissa_box=\box67
\l__siunitx_table_result_box=\box68
\l__siunitx_table_number_align_skip=\skip167
\l__siunitx_table_text_align_skip=\skip168
(c:/TeXLive/2020/texmf-dist/tex/latex/translator/translator.sty
Package: translator 2019-05-31 v1.12a Easy translation of strings in
LaTeX
)) (./main.aux)
\openout1 = `main.aux'.

```

```

LaTeX Font Info: Checking defaults for OML/cmm/m/it on input line 69.
LaTeX Font Info: ... okay on input line 69.

```

```

LaTeX Font Info: Checking defaults for OMS/cmsy/m/n on input line 69.
LaTeX Font Info: ... okay on input line 69.
LaTeX Font Info: Checking defaults for OT1/cmr/m/n on input line 69.
LaTeX Font Info: ... okay on input line 69.
LaTeX Font Info: Checking defaults for T1/cmr/m/n on input line 69.
LaTeX Font Info: ... okay on input line 69.
LaTeX Font Info: Checking defaults for TS1/cmr/m/n on input line 69.
LaTeX Font Info: ... okay on input line 69.
LaTeX Font Info: Checking defaults for OMX/cmex/m/n on input line 69.
LaTeX Font Info: ... okay on input line 69.
LaTeX Font Info: Checking defaults for U/cmr/m/n on input line 69.
LaTeX Font Info: ... okay on input line 69.
LaTeX Font Info: Checking defaults for PD1/pdf/m/n on input line 69.
LaTeX Font Info: ... okay on input line 69.
LaTeX Font Info: Trying to load font information for T1+Merriweather-
OsF on
input line 69.
(c:/TeXLive/2020/texmf-dist/tex/latex/merriweather/T1Merriweather-OsF.fd
File: T1Merriweather-OsF.fd 2019/06/02 (autoinst) Font definitions for
T1/Merri
weather-OsF.
)
LaTeX Font Info: Font shape `T1/Merriweather-OsF/m/n' in size <7.5>
not avai
lable
(Font) Font shape `T1/Merriweather-OsF/regular/n' tried
instead on
input line 69.
LaTeX Font Info: Font shape `T1/Merriweather-OsF/regular/n' will be
(Font) scaled to size 7.5pt on input line 69.
LaTeX Info: Redefining \microtypecontext on input line 69.
Package microtype Info: Generating PDF output.
Package microtype Info: Character protrusion enabled (level 2).
Package microtype Info: Using default protrusion set `alltext'.
Package microtype Info: Automatic font expansion enabled (level 2),
(microtype) stretch: 20, shrink: 20, step: 1, non-selected.
Package microtype Info: Using default expansion set `basicstext'.
LaTeX Info: Redefining \showhyphens on input line 69.
Package microtype Info: No adjustment of tracking.
Package microtype Info: No adjustment of interword spacing.
Package microtype Info: No adjustment of character kerning.
Package microtype Info: Loading generic protrusion settings for font
family
(microtype) `Merriweather-OsF' (encoding: T1).
(microtype) For optimal results, create family-specific
settings.
(microtype) See the microtype manual for details.
LaTeX Font Info: Redeclaring symbol font `operators' on input line 69.
LaTeX Font Info: Encoding `OT1' has changed to `T1' for symbol font
(Font) `operators' in the math version `normal' on input
line 69.
LaTeX Font Info: Overwriting symbol font `operators' in version
`normal'

```

```

(Font) OT1/cmr/m/n --> T1/Merriweather-OsF/m/up on input
line
69.
LaTeX Font Info: Encoding `OT1' has changed to `T1' for symbol font
(Font) `operators' in the math version `bold' on input line
69.
LaTeX Font Info: Overwriting symbol font `operators' in version `bold'
(Font) OT1/cmr/bx/n --> T1/Merriweather-OsF/m/up on
input line
69.
LaTeX Font Info: Overwriting symbol font `operators' in version `bold'
(Font) T1/Merriweather-OsF/m/up --> T1/Merriweather-
OsF/b/up on
n input line 69.
LaTeX Font Info: Redefining math alphabet \mathbf on input line 69.
LaTeX Font Info: Overwriting math alphabet `\mathbf' in version
`normal'
(Font) OT1/cmr/bx/n --> T1/Merriweather-OsF/b/up on
input line
69.
LaTeX Font Info: Overwriting math alphabet `\mathbf' in version `bold'
(Font) OT1/cmr/bx/n --> T1/Merriweather-OsF/b/up on
input line
69.
LaTeX Font Info: Redefining math alphabet \mathsf on input line 69.
LaTeX Font Info: Overwriting math alphabet `\mathsf' in version
`normal'
(Font) OT1/cmss/m/n --> T1/MerriweatherSans-OsF/m/up on
input
line 69.
LaTeX Font Info: Overwriting math alphabet `\mathsf' in version `bold'
(Font) OT1/cmss/bx/n --> T1/MerriweatherSans-OsF/m/up on
input
line 69.
LaTeX Font Info: Redefining math alphabet \mathit on input line 69.
LaTeX Font Info: Overwriting math alphabet `\mathit' in version
`normal'
(Font) OT1/cmr/m/it --> T1/Merriweather-OsF/m/it on
input line
69.
LaTeX Font Info: Overwriting math alphabet `\mathit' in version `bold'
(Font) OT1/cmr/bx/it --> T1/Merriweather-OsF/m/it on
input lin
e 69.
LaTeX Font Info: Redefining math alphabet \mathtt on input line 69.
LaTeX Font Info: Overwriting math alphabet `\mathtt' in version
`normal'
(Font) OT1/cmvt/m/n --> T1/lmvt/m/up on input line 69.
LaTeX Font Info: Overwriting math alphabet `\mathtt' in version `bold'
(Font) OT1/cmvt/m/n --> T1/lmvt/m/up on input line 69.
LaTeX Font Info: Overwriting math alphabet `\mathsf' in version `bold'
(Font) T1/MerriweatherSans-OsF/m/up -->
T1/MerriweatherSans-Os
F/b/up on input line 69.

```

LaTeX Font Info: Overwriting math alphabet `\mathit` in version `'bold'`  
(Font) T1/Merriweather-OsF/m/it --> T1/Merriweather-OsF/b/it o  
n input line 69.  
\c@mv@tabular=\count324  
\c@mv@boldtabular=\count325  
Package mathastext Info: current meaning of amsmath `\resetMathstrut@`  
saved on i  
nput line 69.  
ABD: EverySelectfont initializing macros  
LaTeX Info: Redefining `\selectfont` on input line 69.  
(c:/TeXLive/2020/texmf-dist/tex/context/base/mkii/supp-pdf.mkii  
[Loading MPS to PDF converter (version 2006.09.02).]  
\scratchcounter=\count326  
\scratchdimen=\dimen271  
\scratchbox=\box69  
\nofMPsegments=\count327  
\nofMParguments=\count328  
\everyMPshowfont=\toks41  
\MPscratchCnt=\count329  
\MPscratchDim=\dimen272  
\MPnumerator=\count330  
\makeMPintoPDFobject=\count331  
\everyMPtoPDFconversion=\toks42  
) (c:/TeXLive/2020/texmf-dist/tex/latex/epstopdf-pkg/epstopdf-base.sty  
Package: epstopdf-base 2020-01-24 v2.11 Base part for package epstopdf  
Package epstopdf-base Info: Redefining graphics rule for `'eps'` on input  
line 4  
85.  
(c:/TeXLive/2020/texmf-dist/tex/latex/latexconfig/epstopdf-sys.cfg  
File: epstopdf-sys.cfg 2010/07/13 v1.3 Configuration of (r)epstopdf for  
TeX Liv  
e  
))  
Package lastpage Info: Please have a look at the pageslts package at  
(lastpage) <https://www.ctan.org/pkg/pageslts>  
(lastpage) ! on input line 69.  
ABD: EveryShipout initializing macros  
\AtBeginShipoutBox=\box70  
\*geometry\* driver: auto-detecting  
\*geometry\* detected driver: pdftex  
\*geometry\* verbose mode - [ preamble ] result:  
\* driver: pdftex  
\* paper: a4paper  
\* layout: <same size as paper>  
\* layoutoffset: (h,v)=(0.0pt,0.0pt)  
\* modes: includefoot twoside  
\* h-part: (L,W,R)=(54.64pt, 488.22787pt, 54.64pt)  
\* v-part: (T,H,B)=(66.0pt, 745.04684pt, 34.0pt)  
\* \paperwidth=597.50787pt  
\* \paperheight=845.04684pt  
\* \textwidth=488.22787pt  
\* \textheight=715.04684pt  
\* \oddsidemargin=-17.62999pt



```
* \evensidemargin=-17.62999pt
* \topmargin=-47.76999pt
* \headheight=17.5pt
* \headsep=24.0pt
* \topskip=10.0pt
* \footskip=30.0pt
* \marginparwidth=48.0pt
* \marginparsep=10.0pt
* \columnsep=18.0pt
* \skip\footins=22.0pt plus 2.0pt
* \hoffset=0.0pt
* \voffset=0.0pt
* \mag=1000
* \@twocolumntrue
* \@twosidetrue
* \@mparswitchtrue
* \@reversemarginfalse
* (lin=72.27pt=25.4mm, 1cm=28.453pt)
```

```
Package hyperref Info: Link coloring ON on input line 69.
(c:/TeXLive/2020/texmf-dist/tex/latex/hyperref/nameref.sty
Package: nameref 2019/09/16 v2.46 Cross-referencing by name of section
(c:/TeXLive/2020/texmf-dist/tex/latex/refcount/refcount.sty
Package: refcount 2019/12/15 v3.6 Data extraction from label references
(HO)
) (c:/TeXLive/2020/texmf-
dist/tex/generic/gettitlestring/gettitlestring.sty
Package: gettitlestring 2019/12/15 v1.6 Cleanup title references (HO)
)
\c@section@level=\count332
)
```

```
LaTeX Info: Redefining \ref on input line 69.
LaTeX Info: Redefining \pageref on input line 69.
LaTeX Info: Redefining \nameref on input line 69.
(./main.out) (./main.out)
\@outlinefile=\write3
\openout3 = `main.out'.
```

```
\@gscitedetails=\box71
\@gscitedetailsheight=\skip169
\@gsheadbox=\box72
\@gsheadboxheight=\skip170
LaTeX Font Info: Font shape `T1/Merriweather-OsF/b/n' in size <6.5>
not avai
lable
(Font) Font shape `T1/Merriweather-OsF/bold/n' tried instead
on in
put line 69.
LaTeX Font Info: Font shape `T1/Merriweather-OsF/bold/n' will be
(Font) scaled to size 6.5pt on input line 69.
LaTeX Font Info: Calculating math sizes for size <7.5> on input line
69.
```

```
LaTeX Font Warning: Font shape `T1/Merriweather-OsF/m/up' undefined
```

(Font) using `T1/Merriweather-OsF/m/n' instead on input line 69.

LaTeX Font Info: Font shape `T1/Merriweather-OsF/m/up' in size <6.24973> not available

(Font) Font shape `T1/Merriweather-OsF/regular/n' tried instead on input line 69.

LaTeX Font Info: Font shape `T1/Merriweather-OsF/regular/n' will be scaled to size 6.24973pt on input line 69.

(Font) LaTeX Font Info: Font shape `T1/Merriweather-OsF/m/up' in size <5.24997> not available

(Font) Font shape `T1/Merriweather-OsF/regular/n' tried instead on input line 69.

LaTeX Font Info: Font shape `T1/Merriweather-OsF/regular/n' will be scaled to size 5.24997pt on input line 69.

(Font) LaTeX Font Info: Trying to load font information for U+eur on input line 69.

```
(c:/TeXLive/2020/texmf-dist/tex/latex/amsfonts/ueur.fd
File: ueur.fd 2013/01/14 v3.01 Euler Roman
) (c:/TeXLive/2020/texmf-dist/tex/latex/microtype/mt-eur.cfg
File: mt-eur.cfg 2006/07/31 v1.1 microtype config. file: AMS Euler Roman
(RS)
)
```

LaTeX Font Warning: Font shape `OMS/cmsy/m/n' in size <7.5> not available (Font) size <7> substituted on input line 69.

LaTeX Font Info: Trying to load font information for U+euf on input line 69.

```
(c:/TeXLive/2020/texmf-dist/tex/latex/amsfonts/ueuf.fd
File: ueuf.fd 2013/01/14 v3.01 Euler Fraktur
) (c:/TeXLive/2020/texmf-dist/tex/latex/microtype/mt-euf.cfg
File: mt-euf.cfg 2006/07/03 v1.1 microtype config. file: AMS Euler
Fraktur (RS)
)
```

LaTeX Font Info: Trying to load font information for U+eus on input line 69.

```
(c:/TeXLive/2020/texmf-dist/tex/latex/amsfonts/ueus.fd
File: ueus.fd 2013/01/14 v3.01 Euler Script
) (c:/TeXLive/2020/texmf-dist/tex/latex/microtype/mt-eus.cfg
File: mt-eus.cfg 2006/07/28 v1.2 microtype config. file: AMS Euler Script
(RS)
)
```

LaTeX Font Info: Trying to load font information for U+euex on input line 69

.

(c:/TeXLive/2020/texmf-dist/tex/latex/amsfonts/ueuex.fd  
File: ueuex.fd 2013/01/14 v3.01 Euler extra symbols  
)

LaTeX Font Warning: Font shape `OML/cmm/m/it' in size <7.5> not available  
(Font) size <7> substituted on input line 69.

LaTeX Font Info: Font shape `T1/Merriweather-OsF/m/n' in size  
<6.24973> not available  
(Font) Font shape `T1/Merriweather-OsF/regular/n' tried  
instead on  
input line 69.

LaTeX Font Info: Font shape `T1/Merriweather-OsF/regular/n' will be  
(Font) scaled to size 6.24973pt on input line 69.

LaTeX Font Info: Font shape `T1/Merriweather-OsF/m/n' in size  
<5.24997> not available  
(Font) Font shape `T1/Merriweather-OsF/regular/n' tried  
instead on  
input line 69.

LaTeX Font Info: Font shape `T1/Merriweather-OsF/regular/n' will be  
(Font) scaled to size 5.24997pt on input line 69.

LaTeX Font Info: Font shape `T1/Merriweather-OsF/m/it' in size <7.5>  
not available  
(Font) Font shape `T1/Merriweather-OsF/regular/it' tried  
instead on  
input line 69.

LaTeX Font Info: Font shape `T1/Merriweather-OsF/regular/it' will be  
(Font) scaled to size 7.5pt on input line 69.

LaTeX Font Info: Font shape `T1/Merriweather-OsF/m/it' in size  
<6.24973> not available  
(Font) Font shape `T1/Merriweather-OsF/regular/it' tried  
instead on  
input line 69.

LaTeX Font Info: Font shape `T1/Merriweather-OsF/regular/it' will be  
(Font) scaled to size 6.24973pt on input line 69.

LaTeX Font Info: Font shape `T1/Merriweather-OsF/m/it' in size  
<5.24997> not available  
(Font) Font shape `T1/Merriweather-OsF/regular/it' tried  
instead on  
input line 69.

LaTeX Font Info: Font shape `T1/Merriweather-OsF/regular/it' will be  
(Font) scaled to size 5.24997pt on input line 69.

LaTeX Font Info: Font shape `T1/Merriweather-OsF/m/n' in size <8> not  
available  
(Font) Font shape `T1/Merriweather-OsF/regular/n' tried  
instead on  
input line 69.

LaTeX Font Info: Font shape `T1/Merriweather-OsF/regular/n' will be

(Font) scaled to size 8.0pt on input line 69.  
LaTeX Font Info: Font shape `T1/Merriweather-OsF/m/it' in size <8> not available  
(Font) Font shape `T1/Merriweather-OsF/regular/it' tried instead on input line 69.  
LaTeX Font Info: Font shape `T1/Merriweather-OsF/regular/it' will be scaled to size 8.0pt on input line 69.  
LaTeX Font Info: Font shape `T1/Merriweather-OsF/b/it' in size <8> not available  
(Font) Font shape `T1/Merriweather-OsF/bold/it' tried instead on input line 69.  
LaTeX Font Info: Font shape `T1/Merriweather-OsF/bold/it' will be scaled to size 8.0pt on input line 69.  
Package caption Info: Begin \AtBeginDocument code.  
Package caption Info: End \AtBeginDocument code.

(c:/TeXLive/2020/texmf-dist/tex/latex/translator/translator-basic-dictionary-English.dict  
Dictionary: translator-basic-dictionary, Language: English  
) (c:/TeXLive/2020/texmf-dist/tex/latex/siunitx/siunitx-abbreviations.cfg  
File: siunitx-abbreviations.cfg 2017/11/26 v2.7k siunitx: Abbreviated units  
)  
LaTeX Font Info: Trying to load font information for T1+MerriweatherSans-OsF on input line 69.  
(c:/TeXLive/2020/texmf-dist/tex/latex/merriweather/T1MerriweatherSans-OsF.fd  
File: T1MerriweatherSans-OsF.fd 2019/06/02 (autoinst) Font definitions for T1/MerriweatherSans-OsF.  
)  
LaTeX Font Info: Font shape `T1/MerriweatherSans-OsF/m/n' in size <7.5> not available  
(Font) Font shape `T1/MerriweatherSans-OsF/regular/n' tried instead on input line 69.  
LaTeX Font Info: Font shape `T1/MerriweatherSans-OsF/regular/n' will be scaled to size 7.5pt on input line 69.  
Package microtype Info: Loading generic protrusion settings for font family  
(microtype) `MerriweatherSans-OsF' (encoding: T1).  
(microtype) For optimal results, create family-specific settings.  
(microtype) See the microtype manual for details.  
LaTeX Font Info: Font shape `T1/MerriweatherSans-OsF/m/n' in size <6.24973>

```

not available
(Font)          Font shape `T1/MerriweatherSans-OsF/regular/n' tried
instea
d on input line 69.
LaTeX Font Info: Font shape `T1/MerriweatherSans-OsF/regular/n' will
be
(Font)          scaled to size 6.24973pt on input line 69.
LaTeX Font Info: Font shape `T1/MerriweatherSans-OsF/m/n' in size
<5.24997>
not available
(Font)          Font shape `T1/MerriweatherSans-OsF/regular/n' tried
instea
d on input line 69.
LaTeX Font Info: Font shape `T1/MerriweatherSans-OsF/regular/n' will
be
(Font)          scaled to size 5.24997pt on input line 69.
LaTeX Font Info: Trying to load font information for T1+lmtt on input
line 6
9.
(c:/TeXLive/2020/texmf-dist/tex/latex/lm/t1lmtt.fd
File: t1lmtt.fd 2009/10/30 v1.6 Font defs for Latin Modern
)
Package microtype Info: Loading generic protrusion settings for font
family
(microtype)      `lmtt' (encoding: T1).
(microtype)      For optimal results, create family-specific
settings.
(microtype)      See the microtype manual for details.
TextBlockOrigin set to 4pc+6.64pt x 4pc+6pt
<oup.pdf, id=149, 49.18375pt x 48.18pt>
File: oup.pdf Graphic file (type pdf)
<use oup.pdf>
Package pdftex.def Info: oup.pdf used on input line 82.
(pdftex.def)      Requested size: 59.38191pt x 58.17038pt.
<gigasience-logo.pdf, id=150, 99.37125pt x 33.12375pt>
File: gigasience-logo.pdf Graphic file (type pdf)
<use gigasience-logo.pdf>
Package pdftex.def Info: gigasience-logo.pdf used on input line 82.
(pdftex.def)      Requested size: 126.00902pt x 42.0pt.

Overfull \hbox (54.64pt too wide) in paragraph at lines 82--82
[] []
[]

LaTeX Font Info: Font shape `T1/Merriweather-OsF/m/n' in size <14> not
avail
able
(Font)          Font shape `T1/Merriweather-OsF/regular/n' tried
instead on
input line 82.
LaTeX Font Info: Font shape `T1/Merriweather-OsF/regular/n' will be
(Font)          scaled to size 14.0pt on input line 82.
LaTeX Font Info: Font shape `T1/Merriweather-OsF/m/n' in size
<8.99997> not

```

```

available
(Font) Font shape `T1/Merriweather-OsF/regular/n' tried
instead on
input line 82.
LaTeX Font Info: Font shape `T1/Merriweather-OsF/regular/n' will be
(Font) scaled to size 8.99997pt on input line 82.
LaTeX Font Info: Calculating math sizes for size <14> on input line
82.
LaTeX Font Info: Font shape `T1/Merriweather-OsF/m/up' in size <14>
not avai
lable
(Font) Font shape `T1/Merriweather-OsF/regular/n' tried
instead on
input line 82.
LaTeX Font Info: Font shape `T1/Merriweather-OsF/regular/n' will be
(Font) scaled to size 14.0pt on input line 82.
LaTeX Font Info: Font shape `T1/Merriweather-OsF/m/up' in size
<11.66617> no
t available
(Font) Font shape `T1/Merriweather-OsF/regular/n' tried
instead on
input line 82.
LaTeX Font Info: Font shape `T1/Merriweather-OsF/regular/n' will be
(Font) scaled to size 11.66617pt on input line 82.
LaTeX Font Info: Font shape `T1/Merriweather-OsF/m/up' in size
<9.79996> not
available
(Font) Font shape `T1/Merriweather-OsF/regular/n' tried
instead on
input line 82.
LaTeX Font Info: Font shape `T1/Merriweather-OsF/regular/n' will be
(Font) scaled to size 9.79996pt on input line 82.
LaTeX Font Info: Font shape `T1/Merriweather-OsF/m/n' in size
<11.66617> not
available
(Font) Font shape `T1/Merriweather-OsF/regular/n' tried
instead on
input line 82.
LaTeX Font Info: Font shape `T1/Merriweather-OsF/regular/n' will be
(Font) scaled to size 11.66617pt on input line 82.
LaTeX Font Info: Font shape `T1/Merriweather-OsF/m/n' in size
<9.79996> not
available
(Font) Font shape `T1/Merriweather-OsF/regular/n' tried
instead on
input line 82.
LaTeX Font Info: Font shape `T1/Merriweather-OsF/regular/n' will be
(Font) scaled to size 9.79996pt on input line 82.
LaTeX Font Info: Font shape `T1/Merriweather-OsF/m/it' in size <14>
not avai
lable
(Font) Font shape `T1/Merriweather-OsF/regular/it' tried
instead o
n input line 82.

```

```

LaTeX Font Info: Font shape `T1/Merriweather-OsF/regular/it' will be
(Font) scaled to size 14.0pt on input line 82.
LaTeX Font Info: Font shape `T1/Merriweather-OsF/m/it' in size
<11.66617> no
t available
(Font) Font shape `T1/Merriweather-OsF/regular/it' tried
instead o
n input line 82.
LaTeX Font Info: Font shape `T1/Merriweather-OsF/regular/it' will be
(Font) scaled to size 11.66617pt on input line 82.
LaTeX Font Info: Font shape `T1/Merriweather-OsF/m/it' in size
<9.79996> not
available
(Font) Font shape `T1/Merriweather-OsF/regular/it' tried
instead o
n input line 82.
LaTeX Font Info: Font shape `T1/Merriweather-OsF/regular/it' will be
(Font) scaled to size 9.79996pt on input line 82.
LaTeX Font Info: Font shape `T1/MerriweatherSans-OsF/m/n' in size <14>
not a
vailable
(Font) Font shape `T1/MerriweatherSans-OsF/regular/n' tried
instea
d on input line 82.
LaTeX Font Info: Font shape `T1/MerriweatherSans-OsF/regular/n' will
be
(Font) scaled to size 14.0pt on input line 82.
LaTeX Font Info: Font shape `T1/MerriweatherSans-OsF/m/n' in size
<11.66617>
not available
(Font) Font shape `T1/MerriweatherSans-OsF/regular/n' tried
instea
d on input line 82.
LaTeX Font Info: Font shape `T1/MerriweatherSans-OsF/regular/n' will
be
(Font) scaled to size 11.66617pt on input line 82.
LaTeX Font Info: Font shape `T1/MerriweatherSans-OsF/m/n' in size
<9.79996>
not available
(Font) Font shape `T1/MerriweatherSans-OsF/regular/n' tried
instea
d on input line 82.
LaTeX Font Info: Font shape `T1/MerriweatherSans-OsF/regular/n' will
be
(Font) scaled to size 9.79996pt on input line 82.
LaTeX Font Info: Font shape `T1/Merriweather-OsF/b/n' in size <18> not
avail
able
(Font) Font shape `T1/Merriweather-OsF/bold/n' tried instead
on in
put line 82.
LaTeX Font Info: Font shape `T1/Merriweather-OsF/bold/n' will be
(Font) scaled to size 18.0pt on input line 82.

```

LaTeX Font Info: Font shape `T1/Merriweather-OsF/m/n' in size <13> not available  
(Font) instead on input line 82. Font shape `T1/Merriweather-OsF/regular/n' tried

LaTeX Font Info: (Font) Font shape `T1/Merriweather-OsF/regular/n' will be scaled to size 13.0pt on input line 82.

LaTeX Font Info: (Font) Calculating math sizes for size <13> on input line 82.

LaTeX Font Info: (Font) Font shape `T1/Merriweather-OsF/m/up' in size <13> not available  
(Font) instead on input line 82. Font shape `T1/Merriweather-OsF/regular/n' tried

LaTeX Font Info: (Font) Font shape `T1/Merriweather-OsF/regular/n' will be scaled to size 13.0pt on input line 82.

LaTeX Font Info: (Font) Font shape `T1/Merriweather-OsF/m/up' in size <10.83287> not available  
(Font) instead on input line 82. Font shape `T1/Merriweather-OsF/regular/n' tried

LaTeX Font Info: (Font) Font shape `T1/Merriweather-OsF/regular/n' will be scaled to size 10.83287pt on input line 82.

LaTeX Font Info: (Font) Font shape `T1/Merriweather-OsF/m/up' in size <9.09996> not available  
(Font) instead on input line 82. Font shape `T1/Merriweather-OsF/regular/n' tried

LaTeX Font Info: (Font) Font shape `T1/Merriweather-OsF/regular/n' will be scaled to size 9.09996pt on input line 82.

LaTeX Font Warning: (Font) Font shape `OMS/cmsy/m/n' in size <13> not available size <12> substituted on input line 82.

LaTeX Font Warning: (Font) Font shape `OMX/cmex/m/n' in size <13> not available size <12> substituted on input line 82.

LaTeX Font Warning: (Font) Font shape `OML/cmm/m/it' in size <13> not available size <12> substituted on input line 82.

LaTeX Font Info: (Font) Font shape `T1/Merriweather-OsF/m/n' in size <10.83287> not available  
(Font) instead on input line 82. Font shape `T1/Merriweather-OsF/regular/n' tried

LaTeX Font Info: (Font) Font shape `T1/Merriweather-OsF/regular/n' will be scaled to size 10.83287pt on input line 82.



```

LaTeX Font Info: Font shape `T1/Merriweather-OsF/m/n' in size
<9.09996> not
available
(Font) Font shape `T1/Merriweather-OsF/regular/n' tried
instead on
input line 82.
LaTeX Font Info: Font shape `T1/Merriweather-OsF/regular/n' will be
(Font) scaled to size 9.09996pt on input line 82.
LaTeX Font Info: Font shape `T1/Merriweather-OsF/m/it' in size <13>
not avai
lable
(Font) Font shape `T1/Merriweather-OsF/regular/it' tried
instead o
n input line 82.
LaTeX Font Info: Font shape `T1/Merriweather-OsF/regular/it' will be
(Font) scaled to size 13.0pt on input line 82.
LaTeX Font Info: Font shape `T1/Merriweather-OsF/m/it' in size
<10.83287> no
t available
(Font) Font shape `T1/Merriweather-OsF/regular/it' tried
instead o
n input line 82.
LaTeX Font Info: Font shape `T1/Merriweather-OsF/regular/it' will be
(Font) scaled to size 10.83287pt on input line 82.
LaTeX Font Info: Font shape `T1/Merriweather-OsF/m/it' in size
<9.09996> not
available
(Font) Font shape `T1/Merriweather-OsF/regular/it' tried
instead o
n input line 82.
LaTeX Font Info: Font shape `T1/Merriweather-OsF/regular/it' will be
(Font) scaled to size 9.09996pt on input line 82.
LaTeX Font Info: Font shape `T1/MerriweatherSans-OsF/m/n' in size <13>
not a
vailable
(Font) Font shape `T1/MerriweatherSans-OsF/regular/n' tried
instea
d on input line 82.
LaTeX Font Info: Font shape `T1/MerriweatherSans-OsF/regular/n' will
be
(Font) scaled to size 13.0pt on input line 82.
LaTeX Font Info: Font shape `T1/MerriweatherSans-OsF/m/n' in size
<10.83287>
not available
(Font) Font shape `T1/MerriweatherSans-OsF/regular/n' tried
instea
d on input line 82.
LaTeX Font Info: Font shape `T1/MerriweatherSans-OsF/regular/n' will
be
(Font) scaled to size 10.83287pt on input line 82.
LaTeX Font Info: Font shape `T1/MerriweatherSans-OsF/m/n' in size
<9.09996>
not available

```

(Font) Font shape `T1/MerriweatherSans-OsF/regular/n' tried  
instea  
d on input line 82.  
LaTeX Font Info: Font shape `T1/MerriweatherSans-OsF/regular/n' will  
be  
(Font) scaled to size 9.09996pt on input line 82.  
LaTeX Font Info: Font shape `T1/Merriweather-OsF/m/n' in size <9> not  
availa  
ble  
(Font) Font shape `T1/Merriweather-OsF/regular/n' tried  
instead on  
input line 82.  
LaTeX Font Info: Font shape `T1/Merriweather-OsF/regular/n' will be  
(Font) scaled to size 9.0pt on input line 82.  
LaTeX Font Info: Font shape `T1/Merriweather-OsF/m/up' in size <9> not  
avail  
able  
(Font) Font shape `T1/Merriweather-OsF/regular/n' tried  
instead on  
input line 82.  
LaTeX Font Info: Font shape `T1/Merriweather-OsF/regular/n' will be  
(Font) scaled to size 9.0pt on input line 82.  
LaTeX Font Info: Font shape `T1/Merriweather-OsF/m/up' in size <7> not  
avail  
able  
(Font) Font shape `T1/Merriweather-OsF/regular/n' tried  
instead on  
input line 82.  
LaTeX Font Info: Font shape `T1/Merriweather-OsF/regular/n' will be  
(Font) scaled to size 7.0pt on input line 82.  
LaTeX Font Info: Font shape `T1/Merriweather-OsF/m/up' in size <5> not  
avail  
able  
(Font) Font shape `T1/Merriweather-OsF/regular/n' tried  
instead on  
input line 82.  
LaTeX Font Info: Font shape `T1/Merriweather-OsF/regular/n' will be  
(Font) scaled to size 5.0pt on input line 82.  
LaTeX Font Info: Font shape `T1/Merriweather-OsF/m/n' in size <7> not  
availa  
ble  
(Font) Font shape `T1/Merriweather-OsF/regular/n' tried  
instead on  
input line 82.  
LaTeX Font Info: Font shape `T1/Merriweather-OsF/regular/n' will be  
(Font) scaled to size 7.0pt on input line 82.  
LaTeX Font Info: Font shape `T1/Merriweather-OsF/m/n' in size <5> not  
availa  
ble  
(Font) Font shape `T1/Merriweather-OsF/regular/n' tried  
instead on  
input line 82.  
LaTeX Font Info: Font shape `T1/Merriweather-OsF/regular/n' will be  
(Font) scaled to size 5.0pt on input line 82.

```

LaTeX Font Info: Font shape `T1/Merriweather-OsF/m/it' in size <9> not
avail
able
(Font) Font shape `T1/Merriweather-OsF/regular/it' tried
instead o
n input line 82.
LaTeX Font Info: Font shape `T1/Merriweather-OsF/regular/it' will be
(Font) scaled to size 9.0pt on input line 82.
LaTeX Font Info: Font shape `T1/Merriweather-OsF/m/it' in size <7> not
avail
able
(Font) Font shape `T1/Merriweather-OsF/regular/it' tried
instead o
n input line 82.
LaTeX Font Info: Font shape `T1/Merriweather-OsF/regular/it' will be
(Font) scaled to size 7.0pt on input line 82.
LaTeX Font Info: Font shape `T1/Merriweather-OsF/m/it' in size <5> not
avail
able
(Font) Font shape `T1/Merriweather-OsF/regular/it' tried
instead o
n input line 82.
LaTeX Font Info: Font shape `T1/Merriweather-OsF/regular/it' will be
(Font) scaled to size 5.0pt on input line 82.
LaTeX Font Info: Font shape `T1/MerriweatherSans-OsF/m/n' in size <9>
not av
ailable
(Font) Font shape `T1/MerriweatherSans-OsF/regular/n' tried
instea
d on input line 82.
LaTeX Font Info: Font shape `T1/MerriweatherSans-OsF/regular/n' will
be
(Font) scaled to size 9.0pt on input line 82.
LaTeX Font Info: Font shape `T1/MerriweatherSans-OsF/m/n' in size <7>
not av
ailable
(Font) Font shape `T1/MerriweatherSans-OsF/regular/n' tried
instea
d on input line 82.
LaTeX Font Info: Font shape `T1/MerriweatherSans-OsF/regular/n' will
be
(Font) scaled to size 7.0pt on input line 82.
LaTeX Font Info: Font shape `T1/MerriweatherSans-OsF/m/n' in size <5>
not av
ailable
(Font) Font shape `T1/MerriweatherSans-OsF/regular/n' tried
instea
d on input line 82.
LaTeX Font Info: Font shape `T1/MerriweatherSans-OsF/regular/n' will
be
(Font) scaled to size 5.0pt on input line 82.
LaTeX Font Info: Font shape `T1/Merriweather-OsF/m/n' in size <6.5>
not avai
lable

```

```

(Font) Font shape `T1/Merriweather-OsF/regular/n' tried
instead on
input line 82.
LaTeX Font Info: Font shape `T1/Merriweather-OsF/regular/n' will be
(Font) scaled to size 6.5pt on input line 82.
LaTeX Font Info: Calculating math sizes for size <6.5> on input line
82.
LaTeX Font Info: Font shape `T1/Merriweather-OsF/m/up' in size <6.5>
not ava
ilable
(Font) Font shape `T1/Merriweather-OsF/regular/n' tried
instead on
input line 82.
LaTeX Font Info: Font shape `T1/Merriweather-OsF/regular/n' will be
(Font) scaled to size 6.5pt on input line 82.
LaTeX Font Info: Font shape `T1/Merriweather-OsF/m/up' in size
<5.41643> not
available
(Font) Font shape `T1/Merriweather-OsF/regular/n' tried
instead on
input line 82.
LaTeX Font Info: Font shape `T1/Merriweather-OsF/regular/n' will be
(Font) scaled to size 5.41643pt on input line 82.
LaTeX Font Info: Font shape `T1/Merriweather-OsF/m/up' in size
<4.54997> not
available
(Font) Font shape `T1/Merriweather-OsF/regular/n' tried
instead on
input line 82.
LaTeX Font Info: Font shape `T1/Merriweather-OsF/regular/n' will be
(Font) scaled to size 4.54997pt on input line 82.

LaTeX Font Warning: Font shape `OMS/cmsy/m/n' in size <6.5> not available
(Font) size <6> substituted on input line 82.

LaTeX Font Warning: Font shape `OMS/cmsy/m/n' in size <5.41643> not
available
(Font) size <5> substituted on input line 82.

LaTeX Font Warning: Font shape `OMS/cmsy/m/n' in size <4.54997> not
available
(Font) size <5> substituted on input line 82.

LaTeX Font Warning: Font shape `OML/cmm/m/it' in size <6.5> not available
(Font) size <6> substituted on input line 82.

LaTeX Font Warning: Font shape `OML/cmm/m/it' in size <5.41643> not
available
(Font) size <5> substituted on input line 82.

```

LaTeX Font Warning: Font shape `OML/cmm/m/it' in size <4.54997> not available  
(Font) size <5> substituted on input line 82.

LaTeX Font Info: Font shape `T1/Merriweather-OsF/m/n' in size <5.41643> not available  
(Font) Font shape `T1/Merriweather-OsF/regular/n' tried instead on input line 82.

LaTeX Font Info: Font shape `T1/Merriweather-OsF/regular/n' will be scaled to size 5.41643pt on input line 82.  
(Font)

LaTeX Font Info: Font shape `T1/Merriweather-OsF/m/n' in size <4.54997> not available  
(Font) Font shape `T1/Merriweather-OsF/regular/n' tried instead on input line 82.

LaTeX Font Info: Font shape `T1/Merriweather-OsF/regular/n' will be scaled to size 4.54997pt on input line 82.  
(Font)

LaTeX Font Info: Font shape `T1/Merriweather-OsF/m/it' in size <6.5> not available  
(Font) Font shape `T1/Merriweather-OsF/regular/it' tried instead on input line 82.

LaTeX Font Info: Font shape `T1/Merriweather-OsF/regular/it' will be scaled to size 6.5pt on input line 82.  
(Font)

LaTeX Font Info: Font shape `T1/Merriweather-OsF/m/it' in size <5.41643> not available  
(Font) Font shape `T1/Merriweather-OsF/regular/it' tried instead on input line 82.

LaTeX Font Info: Font shape `T1/Merriweather-OsF/regular/it' will be scaled to size 5.41643pt on input line 82.  
(Font)

LaTeX Font Info: Font shape `T1/Merriweather-OsF/m/it' in size <4.54997> not available  
(Font) Font shape `T1/Merriweather-OsF/regular/it' tried instead on input line 82.

LaTeX Font Info: Font shape `T1/Merriweather-OsF/regular/it' will be scaled to size 4.54997pt on input line 82.  
(Font)

LaTeX Font Info: Font shape `T1/MerriweatherSans-OsF/m/n' in size <6.5> not available  
(Font) Font shape `T1/MerriweatherSans-OsF/regular/n' tried instead on input line 82.

LaTeX Font Info: Font shape `T1/MerriweatherSans-OsF/regular/n' will be scaled to size 6.5pt on input line 82.  
(Font)

LaTeX Font Info: Font shape `T1/MerriweatherSans-OsF/m/n' in size <5.41643> not available  
(Font) Font shape `T1/MerriweatherSans-OsF/regular/n' tried instead on input line 82.

LaTeX Font Info: Font shape `T1/MerriweatherSans-OsF/regular/n' will be  
(Font) scaled to size 5.41643pt on input line 82.

LaTeX Font Info: Font shape `T1/MerriweatherSans-OsF/m/n' in size <4.54997> not available  
(Font) Font shape `T1/MerriweatherSans-OsF/regular/n' tried instead on input line 82.

LaTeX Font Info: Font shape `T1/MerriweatherSans-OsF/regular/n' will be  
(Font) scaled to size 4.54997pt on input line 82.

LaTeX Font Info: Trying to load font information for TS1+Merriweather-OsF on input line 82.  
(c:/TeXLive/2020/texmf-dist/tex/latex/merriweather/TS1Merriweather-OsF.fd  
File: TS1Merriweather-OsF.fd 2019/06/02 (autoinst) Font definitions for TS1/Merriweather-OsF.  
)

LaTeX Font Info: Font shape `TS1/Merriweather-OsF/m/n' in size <5.41643> not available  
(Font) Font shape `TS1/Merriweather-OsF/regular/n' tried instead on input line 82.

LaTeX Font Info: Font shape `TS1/Merriweather-OsF/regular/n' will be  
(Font) scaled to size 5.41643pt on input line 82.

Package microtype Info: Loading generic protrusion settings for font family  
(microtype) `Merriweather-OsF' (encoding: TS1).  
(microtype) For optimal results, create family-specific settings.  
(microtype) See the microtype manual for details.

Overfull \hbox (54.64pt too wide) in paragraph at lines 82--82  
[] [] []  
[]

LaTeX Font Info: Font shape `T1/Merriweather-OsF/b/n' in size <10> not available  
(Font) Font shape `T1/Merriweather-OsF/bold/n' tried instead on input line 82.

LaTeX Font Info: Font shape `T1/Merriweather-OsF/bold/n' will be  
(Font) scaled to size 10.0pt on input line 82.

LaTeX Font Info: Font shape `T1/Merriweather-OsF/b/n' in size <8> not available  
(Font) Font shape `T1/Merriweather-OsF/bold/n' tried instead on input line 82.  
LaTeX Font Info: Font shape `T1/Merriweather-OsF/bold/n' will be scaled to size 8.0pt on input line 82.  
(Font)  
Overfull \hbox (54.64pt too wide) in paragraph at lines 82--82  
[] [] []  
[]

LaTeX Warning: Text page 1 contains only floats.

Overfull \vbox (19.3999pt too high) has occurred while \output is active  
[]

LaTeX Warning: Text page 1 contains only floats.

Overfull \vbox (19.3999pt too high) has occurred while \output is active  
[]

LaTeX Font Info: Font shape `T1/Merriweather-OsF/m/n' in size <7.8> not available  
(Font) Font shape `T1/Merriweather-OsF/regular/n' tried instead on input line 82.  
LaTeX Font Info: Font shape `T1/Merriweather-OsF/regular/n' will be scaled to size 7.8pt on input line 82.  
(Font)  
LaTeX Font Info: Font shape `T1/Merriweather-OsF/b/n' in size <7.8> not available  
(Font) Font shape `T1/Merriweather-OsF/bold/n' tried instead on input line 82.  
LaTeX Font Info: Font shape `T1/Merriweather-OsF/bold/n' will be scaled to size 7.8pt on input line 82.  
(Font)  
[1{c:/TeXLive/2020/texmf-var/fonts/map/pdftex/updmap/pdftex.map}]

<./oup.pdf> <./gigascience-logo.pdf>  
<fig1-nccid-infra.png, id=171, 432.31914pt x 244.12807pt>  
File: fig1-nccid-infra.png Graphic file (type png)  
<use fig1-nccid-infra.png>  
Package pdftex.def Info: fig1-nccid-infra.png used on input line 98.  
(pdftex.def) Requested size: 390.58379pt x 220.56253pt.  
LaTeX Font Info: Font shape `T1/Merriweather-OsF/m/n' in size <6> not available

ble  
(Font) Font shape `T1/Merriweather-OsF/regular/n' tried  
instead on  
input line 100.  
LaTeX Font Info: Font shape `T1/Merriweather-OsF/regular/n' will be  
(Font) scaled to size 6.0pt on input line 100.  
LaTeX Font Info: Font shape `T1/Merriweather-OsF/b/n' in size <6> not  
availa  
ble  
(Font) Font shape `T1/Merriweather-OsF/bold/n' tried instead  
on in  
put line 100.  
LaTeX Font Info: Font shape `T1/Merriweather-OsF/bold/n' will be  
(Font) scaled to size 6.0pt on input line 100.  
LaTeX Font Info: Font shape `T1/Merriweather-OsF/b/n' in size <7.5>  
not avai  
lable  
(Font) Font shape `T1/Merriweather-OsF/bold/n' tried instead  
on in  
put line 103.  
LaTeX Font Info: Font shape `T1/Merriweather-OsF/bold/n' will be  
(Font) scaled to size 7.5pt on input line 103.

Package natbib Warning: Citation `kanne2021covid' on page 2 undefined on  
input  
line 103.

Package natbib Warning: Citation `hosseiny2020radiology' on page 2  
undefined on  
input line 103.

Package natbib Warning: Citation `kooraki2020coronavirus' on page 2  
undefined o  
n input line 103.

Package natbib Warning: Citation `shi2020radiological' on page 2  
undefined on i  
nput line 103.

Package natbib Warning: Citation `lee2020covid' on page 2 undefined on  
input li  
ne 103.

Package natbib Warning: Citation `summers2021artificial' on page 2  
undefined on  
input line 103.



Package natbib Warning: Citation `shi2020radiological' on page 2 undefined on input line 103.

Package natbib Warning: Citation `chung2020ct' on page 2 undefined on input line 103.

Package natbib Warning: Citation `kanne2020chest' on page 2 undefined on input line 103.

Package natbib Warning: Citation `cleverley2020role' on page 2 undefined on input line 103.

Package natbib Warning: Citation `ISARIC4c' on page 2 undefined on input line 105.

Package natbib Warning: Citation `tsai2021rsna' on page 2 undefined on input line 105.

Package natbib Warning: Citation `maxmen2021one' on page 2 undefined on input line 105.

Package natbib Warning: Citation `khuzani2021covid' on page 2 undefined on input line 105.

Package natbib Warning: Citation `gangloff2021machine' on page 2 undefined on input line 105.

Package natbib Warning: Citation `shiri2021machine' on page 2 undefined on input line 105.

Package natbib Warning: Citation `fernandes2021multipurpose' on page 2 undefined on input line 105.

Package natbib Warning: Citation `booth2021development' on page 2 undefined on input line 105.

Package natbib Warning: Citation `syeda2021role' on page 2 undefined on input line 105.

Package natbib Warning: Citation `roberts2021common' on page 2 undefined on input line 107.

Package natbib Warning: Citation `NHSXAIlab' on page 2 undefined on input line 109.

Package natbib Warning: Citation `jacob2020using' on page 2 undefined on input line 109.

Underfull \vbox (badness 1132) has occurred while \output is active []

LaTeX Font Info: Font shape `T1/Merriweather-OsF/b/n' in size <7> not available  
(Font) Font shape `T1/Merriweather-OsF/bold/n' tried instead on input line 122.  
LaTeX Font Info: Font shape `T1/Merriweather-OsF/bold/n' will be scaled to size 7.0pt on input line 122.  
(Font)  
! Undefined control sequence.  
<recently read> \uline

1.129 ... &\textbf{\uline{7,500}}

The control sequence at the end of the top line of your error message was never \def'ed. If you have misspelled it (e.g., `hobx'), type `I' and the correct spelling (e.g., `I\hbox'). Otherwise just continue, and I'll forget about whatever was undefined.

Underfull \vbox (badness 10000) has occurred while \output is active []

LaTeX Font Info: Font shape `T1/Merriweather-OsF/m/it' in size <7.8> not available

(Font) Font shape `T1/Merriweather-OsF/regular/it' tried instead o  
n input line 131.  
LaTeX Font Info: Font shape `T1/Merriweather-OsF/regular/it' will be  
(Font) scaled to size 7.8pt on input line 131.  
[2 <./fig1-nccid-infra.png>]  
! Undefined control sequence.  
<recently read> \uline

1.142 ... & \textbf{\uline{19,945}}

The control sequence at the end of the top line of your error message was never \def'ed. If you have misspelled it (e.g., `\hobx'`), type ``I'` and the correct spelling (e.g., ``I\hbox'`). Otherwise just continue, and I'll forget about whatever was undefined.

LaTeX Font Info: Font shape `T1/Merriweather-OsF/b/n' in size <8.5> not avai  
lable  
(Font) Font shape `T1/Merriweather-OsF/bold/n' tried instead on in  
put line 146.  
LaTeX Font Info: Font shape `T1/Merriweather-OsF/bold/n' will be  
(Font) scaled to size 8.5pt on input line 146.

Underfull \hbox (badness 3849) in paragraph at lines 156--158  
\T1/Merriweather-OsF/regular/n/7.5 The in-clu-sion cri-te-ria for in-di-vid-u-a  
ls within the NC-CID  
[]

LaTeX Font Info: Font shape `TS1/Merriweather-OsF/m/n' in size <7.5> not ava  
ilable  
(Font) Font shape `TS1/Merriweather-OsF/regular/n' tried instead o  
n input line 158.  
LaTeX Font Info: Font shape `TS1/Merriweather-OsF/regular/n' will be  
(Font) scaled to size 7.5pt on input line 158.

Package natbib Warning: Citation `watson2020interpreting' on page 3 undefined o  
n input line 166.

[3]

Package natbib Warning: Citation `BSTI' on page 4 undefined on input line 180.

Underfull \hbox (badness 1348) in paragraph at lines 180--181  
\T1/Merriweather-OsF/regular/n/7.5 treated (in-tu-ba-tion, ad-mit-ted to In-ten

-sive Ther-apy Unit  
[]

! Misplaced alignment tab character &.  
1.187 ...ded by NHS England and Improvement (NHSE&  
I) for ethnicity data  
(int...  
I can't figure out why you would want to use a tab mark  
here. If you just want an ampersand, the remedy is  
simple: Just type `I\&' now. But if some right brace  
up above has ended a previous alignment prematurely,  
you're probably due for more error messages, and you  
might try typing `S' now just to see what is salvageable.

Underfull \vbox (badness 5519) has occurred while \output is active []

<Fig2-completeness.png, id=197, 1505.625pt x 2409.0pt>  
File: Fig2-completeness.png Graphic file (type png)  
<use Fig2-completeness.png>  
Package pdftex.def Info: Fig2-completeness.png used on input line 205.  
(pdftex.def) Requested size: 341.75801pt x 546.81697pt.  
LaTeX Font Info: Font shape `T1/Merriweather-OsF/b/sl' in size <7.5>  
not available  
(Font) Font shape `T1/Merriweather-OsF/bold/sl' tried  
instead on input line 213.  
LaTeX Font Info: Font shape `T1/Merriweather-OsF/bold/sl' in size  
<7.5> not available  
(Font) Font shape `T1/Merriweather-OsF/bold/it' tried  
instead on input line 213.  
LaTeX Font Info: Font shape `T1/Merriweather-OsF/bold/it' will be  
(Font) scaled to size 7.5pt on input line 213.

[4]  
Underfull \vbox (badness 10000) has occurred while \output is active []

[5 <./fig2-completeness.png>]

Package natbib Warning: Citation `Pydicom' on page 6 undefined on input  
line 23  
0.

Underfull \hbox (badness 1337) in paragraph at lines 230--231  
[]\T1/Merriweather-OsF/regular/n/7.5 Subsequent sections of the analysis  
utilise the DI-COM  
[]

<fig3-historic.png, id=217, 1003.75pt x 1204.5pt>  
File: fig3-historic.png Graphic file (type png)

```

<use fig3-historic.png>
Package pdftex.def Info: fig3-historic.png used on input line 235.
(pdfteX.def) Requested size: 341.75801pt x 410.11272pt.
LaTeX Font Info: Font shape `T1/Merriweather-OsF/m/up' in size <7.5>
not available
(Font) Font shape `T1/Merriweather-OsF/regular/n' tried
instead on
input line 248.
LaTeX Font Info: Font shape `T1/Merriweather-OsF/regular/n' will be
(Font) scaled to size 7.5pt on input line 248.
! Misplaced alignment tab character &.
1.249 D_{1} &
= date_{image} - date_{positiveSwabTaken}
I can't figure out why you would want to use a tab mark
here. If you just want an ampersand, the remedy is
simple: Just type `I\&' now. But if some right brace
up above has ended a previous alignment prematurely,
you're probably due for more error messages, and you
might try typing `S' now just to see what is salvageable.

! Misplaced alignment tab character &.
1.252 D_{2} &
= day_{image} - (date_{admission} -
days_{durationOfSympto...
I can't figure out why you would want to use a tab mark
here. If you just want an ampersand, the remedy is
simple: Just type `I\&' now. But if some right brace
up above has ended a previous alignment prematurely,
you're probably due for more error messages, and you
might try typing `S' now just to see what is salvageable.

<fig4-imagetiming.png, id=219, 1006.76125pt x 1192.455pt>
File: fig4-imagetiming.png Graphic file (type png)
<use fig4-imagetiming.png>
Package pdftex.def Info: fig4-imagetiming.png used on input line 257.
(pdfteX.def) Requested size: 341.75801pt x 404.7925pt.
LaTeX Font Info: Font shape `T1/Merriweather-OsF/m/up' in size <6> not
available
(Font) Font shape `T1/Merriweather-OsF/regular/n' tried
instead on
input line 258.
LaTeX Font Info: Font shape `T1/Merriweather-OsF/regular/n' will be
(Font) scaled to size 6.0pt on input line 258.
LaTeX Font Info: Font shape `T1/Merriweather-OsF/m/it' in size <6> not
available
(Font) Font shape `T1/Merriweather-OsF/regular/it' tried
instead on
input line 258.
LaTeX Font Info: Font shape `T1/Merriweather-OsF/regular/it' will be
(Font) scaled to size 6.0pt on input line 258.

```

LaTeX Font Info: Font shape `T1/MerriweatherSans-OsF/m/n' in size <6>  
not available  
(Font) Font shape `T1/MerriweatherSans-OsF/regular/n' tried  
instead on input line 258.  
LaTeX Font Info: Font shape `T1/MerriweatherSans-OsF/regular/n' will  
be  
(Font) scaled to size 6.0pt on input line 258.

Underfull \hbox (badness 10000) in paragraph at lines 275--276

[]

Underfull \hbox (badness 1412) in paragraph at lines 282--283  
[]\T1/Merriweather-OsF/regular/n/7.5 All X-ray and CT man-u-fac-tur-ers  
had stud-ies for both  
[]

Underfull \hbox (badness 10000) in paragraph at lines 282--283

[]

[6]  
<fig5-manufacturers.png, id=231, 1003.75pt x 1204.5pt>  
File: fig5-manufacturers.png Graphic file (type png)  
<use fig5-manufacturers.png>  
Package pdftex.def Info: fig5-manufacturers.png used on input line 286.  
(pdftex.def) Requested size: 341.75801pt x 410.11272pt.

LaTeX Warning: `!h' float specifier changed to `!ht'.

Package natbib Warning: Citation `kooraki2020coronavirus' on page 7  
undefined on  
input line 305.

LaTeX Warning: Reference `tab:modelsxray' on page 7 undefined on input  
line 312

.

Underfull \vbox (badness 2213) has occurred while \output is active []

<fig6-regional.png, id=233, 1003.75pt x 602.25pt>  
File: fig6-regional.png Graphic file (type png)  
<use fig6-regional.png>  
Package pdftex.def Info: fig6-regional.png used on input line 319.  
(pdftex.def) Requested size: 341.75801pt x 205.05635pt.

LaTeX Warning: `!h' float specifier changed to `!ht'.

<fig6-maps.pdf, id=234, 722.7pt x 406.51875pt>

File: fig6-maps.pdf Graphic file (type pdf)

<use fig6-maps.pdf>

Package pdftex.def Info: fig6-maps.pdf used on input line 324.

(pdftex.def) Requested size: 341.75801pt x 192.23619pt.

LaTeX Warning: `!h' float specifier changed to `!ht'.

Package natbib Warning: Citation `NHSregional' on page 7 undefined on input line 332.

Underfull \vbox (badness 10000) has occurred while \output is active []

[7 <./fig3-historic.png>]

Package natbib Warning: Citation `PHEdashboard' on page 8 undefined on input line 334.

Package natbib Warning: Citation `ONSgeo' on page 8 undefined on input line 334

.

Underfull \vbox (badness 1424) has occurred while \output is active []

[8 <./fig4-imagetiming.png>]

Underfull \vbox (badness 10000) has occurred while \output is active []

Underfull \vbox (badness 10000) has occurred while \output is active []

[9 <./fig5-manufacturers.png> <./fig6-regional.png>]

Package natbib Warning: Citation `docherty2020features' on page 10 undefined on input line 347.

Package natbib Warning: Citation `harrison2020ethnicity' on page 10 undefined on input line 347.

Underfull \hbox (badness 2042) in paragraph at lines 349--350  
\T1/Merriweather-OsF/regular/n/7.5 (i.e., if the original NC-CID sample had n=3000 patients

[]

Underfull \hbox (badness 10000) in paragraph at lines 349--350

[]

<fig7-sex.png, id=257, 1003.75pt x 1204.5pt>

File: fig7-sex.png Graphic file (type png)

<use fig7-sex.png>

Package pdftex.def Info: fig7-sex.png used on input line 354.

(pdftex.def) Requested size: 341.75801pt x 410.11272pt.

Package natbib Warning: Citation `ONScensus' on page 10 undefined on input line

358.

Package natbib Warning: Citation `docherty2020features' on page 10 undefined on

input line 358.

Package natbib Warning: Citation `NHSdeaths' on page 10 undefined on input line

360.

Underfull \hbox (badness 10000) in paragraph at lines 360--361

[]

<fig8-ethnicity.png, id=260, 1003.75pt x 1204.5pt>

File: fig8-ethnicity.png Graphic file (type png)

<use fig8-ethnicity.png>

Package pdftex.def Info: fig8-ethnicity.png used on input line 365.

(pdftex.def) Requested size: 341.75801pt x 410.11272pt.

Package natbib Warning: Citation `ONScensus' on page 10 undefined on input line

368.

Package natbib Warning: Citation `harrison2020ethnicity' on page 10 undefined on

input line 368.

Package natbib Warning: Citation `NHSdeaths' on page 10 undefined on input line

372.

<fig9-age1.png, id=263, 2007.5pt x 2409.0pt>

File: fig9-age1.png Graphic file (type png)



<use fig9-age1.png>

Package pdftex.def Info: fig9-age1.png used on input line 379.  
(pdftex.def) Requested size: 341.75801pt x 410.11272pt.

Package natbib Warning: Citation `PHEdashboard' on page 10 undefined on  
input line 383.

[10 <./fig6-maps.pdf>]

Underfull \vbox (badness 6236) has occurred while \output is active []

<fig10-age2.png, id=286, 1003.75pt x 602.25pt>

File: fig10-age2.png Graphic file (type png)

<use fig10-age2.png>

Package pdftex.def Info: fig10-age2.png used on input line 395.  
(pdftex.def) Requested size: 341.75801pt x 205.05635pt.

Package natbib Warning: Citation `NHSdeaths' on page 11 undefined on  
input line 399.

[11 <./fig7-sex.png>]

<fig11-temporal.png, id=295, 1003.75pt x 602.25pt>

File: fig11-temporal.png Graphic file (type png)

<use fig11-temporal.png>

Package pdftex.def Info: fig11-temporal.png used on input line 406.  
(pdftex.def) Requested size: 341.75801pt x 205.05635pt.

Package natbib Warning: Citation `PHEdashboard' on page 12 undefined on  
input line 410.

Underfull \vbox (badness 10000) has occurred while \output is active []

Package hyperref Warning: Difference (2) between bookmark levels is  
greater  
(hyperref) than one, level fixed on input line 416.

Package natbib Warning: Citation `guan2020comorbidity' on page 12  
undefined on  
input line 421.

Package natbib Warning: Citation `wang2020does' on page 12 undefined on  
input line 421.

Package natbib Warning: Citation `de2020mechanism' on page 12 undefined  
on input line 421.

Package natbib Warning: Citation `petrilli2020factors' on page 12  
undefined on  
input line 421.

! Undefined control sequence.  
1.423 .... Furthermore, some fields such as `\textit`  
`{O2 saturation}` are  
obsole...

The control sequence at the end of the top line  
of your error message was never `\def`'ed. If you have  
misspelled it (e.g., `\hobx'`), type ``I'` and the correct  
spelling (e.g., ``I\hbox'`). Otherwise just continue,  
and I'll forget about whatever was undefined.

[12 `<./fig8-ethnicity.png>`]  
Underfull `\vbox` (badness 10000) has occurred while `\output` is active []

Underfull `\vbox` (badness 10000) has occurred while `\output` is active []

[13 `<./fig9-age1.png>` `<./fig10-age2.png>`]

Package natbib Warning: Citation `BSTI' on page 14 undefined on input  
line 429.

Package natbib Warning: Citation `ISARIC4c' on page 14 undefined on input  
line  
433.

! Undefined control sequence.  
1.436 `\noindent`  
`\textbf{Historic and acute}` \\  
The control sequence at the end of the top line  
of your error message was never `\def`'ed. If you have  
misspelled it (e.g., `\hobx'`), type ``I'` and the correct  
spelling (e.g., ``I\hbox'`). Otherwise just continue,  
and I'll forget about whatever was undefined.

Underfull `\hbox` (badness 10000) in paragraph at lines 441--442

[]

Package natbib Warning: Citation `BSTI' on page 14 undefined on input  
line 444.

[14 `<./fig11-temporal.png>`]  
Underfull `\hbox` (badness 10000) in paragraph at lines 446--447

[ ]

Package natbib Warning: Citation `kooraki2020coronavirus' on page 15 undefined on input line 451.

Package natbib Warning: Citation `roberts2021common' on page 15 undefined on input line 453.

Underfull \hbox (badness 10000) in paragraph at lines 469--470

[ ]

Package natbib Warning: Citation `docherty2020features' on page 15 undefined on input line 472.

Package natbib Warning: Citation `pollan2020prevalence' on page 15 undefined on input line 472.

[15]

Package natbib Warning: Citation `ludvigsson2020systematic' on page 16 undefined on input line 474.

Package natbib Warning: Citation `dong2020epidemiology' on page 16 undefined on input line 474.

Package natbib Warning: Citation `martin2020socio' on page 16 undefined on input line 476.

Package natbib Warning: Citation `sze2020ethnicity' on page 16 undefined on input line 476.

Package natbib Warning: Citation `harrison2020ethnicity' on page 16 undefined on input line 476.

Package natbib Warning: Citation `docherty2020features' on page 16  
undefined on  
input line 476.

Package natbib Warning: Citation `PHEdashboard' on page 16 undefined on  
input l  
ine 480.

Package natbib Warning: Citation `pollan2020prevalence' on page 16  
undefined on  
input line 480.

Package natbib Warning: Citation `sapey2020ethnicity' on page 16  
undefined on i  
nput line 480.

Package natbib Warning: Citation `apea2021ethnicity' on page 16 undefined  
on in  
put line 480.

Package natbib Warning: Citation `gebhard2020impact' on page 16 undefined  
on in  
put line 482.

Package natbib Warning: Citation `klein2020biological' on page 16  
undefined on  
input line 482.

Package natbib Warning: Citation `petrilli2020factors' on page 16  
undefined on  
input line 482.

Package natbib Warning: Citation `PHEdisparities' on page 16 undefined on  
input  
line 484.

Package natbib Warning: Citation `docherty2020features' on page 16  
undefined on  
input line 484.

Package natbib Warning: Citation `petrilli2020factors' on page 16  
undefined on  
input line 484.

Package natbib Warning: Citation `gebhard2020impact' on page 16 undefined on input line 484.

Package natbib Warning: Citation `klein2020biological' on page 16 undefined on input line 484.

Package natbib Warning: Citation `harrison2020ethnicity' on page 16 undefined on input line 484.

Package natbib Warning: Citation `sapey2020ethnicity' on page 16 undefined on input line 484.

Package natbib Warning: Citation `sze2020ethnicity' on page 16 undefined on input line 484.

Package natbib Warning: Citation `Fusseymet' on page 16 undefined on input line 484.

Package natbib Warning: Citation `begley2020explainability' on page 16 undefined on input line 484.

Package natbib Warning: Citation `mehrabi2019survey' on page 16 undefined on input line 484.

Underfull \hbox (badness 1107) in paragraph at lines 484--485  
Merriweather-OSF/regular/n/7.5 slightly different demographic composition to the general  
[ ]

Underfull \hbox (badness 2846) in paragraph at lines 484--485  
Merriweather-OSF/regular/n/7.5 prevalence of comorbidities varies across ethnicities and  
[ ]

Underfull \hbox (badness 10000) in paragraph at lines 484--485

[]

Package natbib Warning: Citation `Rambaut20' on page 16 undefined on input line 487.

Package natbib Warning: Citation `kirby2021new' on page 16 undefined on input line 489.

Package natbib Warning: Citation `volz2021transmission' on page 16 undefined on input line 489.

Package natbib Warning: Citation `BBCfirst' on page 16 undefined on input line 493.

Package natbib Warning: Citation `PHEdashboard' on page 16 undefined on input line 493.

Underfull \vbox (badness 10000) has occurred while \output is active []

[16]

Package natbib Warning: Citation `ISARIC4c' on page 17 undefined on input line 506.

Package natbib Warning: Citation `roberts2021common' on page 17 undefined on input line 512.

Underfull \vbox (badness 3623) has occurred while \output is active []

Package natbib Warning: Citation `cushnan2021supporting' on page 17 undefined on input line 522.

LaTeX Font Info: Font shape `T1/Merriweather-OsF/m/n' in size <8.5>  
not available  
(Font) Font shape `T1/Merriweather-OsF/regular/n' tried  
instead on  
input line 558.  
LaTeX Font Info: Font shape `T1/Merriweather-OsF/regular/n' will be  
(Font) scaled to size 8.5pt on input line 558.  
[17]  
No file main.bbl.

AED: lastpage setting LastPage  
[18

]

Package natbib Warning: There were undefined citations.

Package atveryend Info: Empty hook `BeforeClearDocument' on input line  
591.

Package atveryend Info: Empty hook `AfterLastShipout' on input line 591.  
(./main.aux)

Package atveryend Info: Executing hook `AtVeryEndDocument' on input line  
591.

Package atveryend Info: Executing hook `AtEndAfterFileList' on input line  
591.

Package rerunfilecheck Info: File `main.out' has not changed.  
(rerunfilecheck) Checksum:  
EC38B1D4531FFCAFCC2EB041B717D3BD;2470.

LaTeX Font Warning: Size substitutions with differences  
(Font) up to 1.0pt have occurred.

LaTeX Font Warning: Some font shapes were not available, defaults  
substituted.

LaTeX Warning: There were undefined references.

)

Here is how much of TeX's memory you used:

18840 strings out of 480681  
340501 string characters out of 5908536  
671753 words of memory out of 5000000  
34132 multiletter control sequences out of 15000+600000  
603005 words of font info for 227 fonts, out of 8000000 for 9000  
1141 hyphenation exceptions out of 8191  
65i,16n,110p,1915b,860s stack positions out of  
5000i,500n,10000p,200000b,80000s  
{c:/TeXLive/2020/texmf-  
dist/fonts/enc/dvips/merriweather/mwth\_clyrx2.enc}{c:/  
TeXLive/2020/texmf-  
dist/fonts/enc/dvips/merriweather/mwth\_l3riwr.enc}<c:/TeXLiv

```
e/2020/texmf-dist/fonts/truetype/sorkin/merriweather/Merriweather-
BoldIt.ttf><c
:/TeXLive/2020/texmf-dist/fonts/typel/sorkin/merriweather/Merriweather-
Bold.pfb
><c:/TeXLive/2020/texmf-
dist/fonts/typel/sorkin/merriweather/Merriweather-Itali
c.pfb><c:/TeXLive/2020/texmf-
dist/fonts/typel/sorkin/merriweather/Merriweather-
Regular.pfb>
Output written on main.pdf (18 pages, 1213413 bytes).
PDF statistics:
 398 PDF objects out of 1000 (max. 8388607)
 339 compressed objects within 4 object streams
 92 named destinations out of 1000 (max. 500000)
43367 words of extra memory for PDF output out of 51595 (max. 10000000)
```



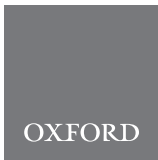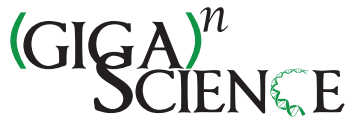*GigaScience*, 2021, 1–19doi: [xx.xxxx/xxxx](#)Manuscript in Preparation  
Data Note

## DATA NOTE

## An overview of the National COVID–19 Chest Imaging Database: data quality and cohort analysis

Dominic Cushnan<sup>1</sup>, Oscar Bennett<sup>2</sup>, Rosalind Berka<sup>2</sup>, Ottavia Bertolli<sup>2</sup>, Ashwin Chopra<sup>2</sup>, Samie Dorgham<sup>2</sup>, Alberto Favaro<sup>2</sup>, Tara Ganepola<sup>2</sup>, Mark Halling–Brown<sup>3</sup>, Gergely Imreh<sup>2</sup>, Joseph Jacob<sup>4,5</sup>, Emily Jefferson<sup>6,7</sup>, François Lemarchand<sup>1</sup>, Daniel Schofield<sup>1</sup>, Jeremy C Wyatt<sup>8,9</sup> and NCCID Collaborative<sup>10</sup>

<sup>1</sup>AI Lab, NHSX, Skipton House, 80 London Road, London SE1 6LH and <sup>2</sup>Faculty, 54 Welbeck Street, London W1G 9XS and <sup>3</sup>Scientific Computing, Royal Surrey NHS Foundation Trust, Egerton Road, Guildford, GU2 7XX and <sup>4</sup>UCL Respiratory, 1st Floor, Rayne Institute, University College London, London, WC1E 6JF and <sup>5</sup>UCL Respiratory, 1st Floor, Rayne Institute, University College London, London, WC1E 6JF and <sup>6</sup>Health Data Research UK, Gibbs Building, 215 Euston Road, London, NW1 2BE and <sup>7</sup>Health Informatics Centre (HIC), School of Medicine, University of Dundee, DD1 4HN and <sup>8</sup>Emeritus Professor of Digital Healthcare, University of Southampton, Southampton SO17 1BJ and <sup>9</sup>Advisor, NHSX, Skipton House, 80 London Road, London SE1 6LH and <sup>10</sup>[NCCID Collaborative](#)

\*Corresponding author: [francois.lemarchand@nhsx.nhs.uk](mailto:francois.lemarchand@nhsx.nhs.uk)

### Abstract

**Background:** The National COVID–19 Chest Imaging Database (NCCID) is a centralised database containing mainly chest X–rays and Computed Tomography (CT) scans from patients across the UK. The objective of the initiative is to support a better understanding of the coronavirus SARS–CoV–2 disease (COVID–19) and the development of machine learning technologies that will improve care for patients hospitalised with a severe COVID–19 infection. This paper introduces the training dataset, including a snapshot analysis covering: the completeness of clinical data, and availability of image data for the various use–cases (diagnosis, prognosis, longitudinal risk). An additional cohort analysis measures how well the NCCID represents the wider COVID–19 affected UK population in terms of geographic, demographic and temporal coverage. **Findings:** The NCCID offers high quality DICOM images acquired across a variety of imaging machinery; multiple time points including historical images are available for a subset of patients. This volume and variety make the database well–suited to development of diagnostic/prognostic models for COVID–associated respiratory conditions. Historical images and clinical data may aid long–term risk stratification, particularly as availability of comorbidity data increases through linkage to other resources. The cohort analysis revealed good alignment to general UK COVID–19 statistics for some categories, e.g., sex, whilst identifying areas for improvements to data collection methods, particularly geographic coverage. **Conclusion:** The NCCID is a growing resource that provides researchers with a large, high–quality database that can be leveraged to both support the response to the COVID–19 pandemic and as a test bed for building clinically viable medical imaging models.

**Key words:** SARS–CoV2; COVID–19; thoracic imaging; medical imaging; machine learning;

## Background

Radiology has played a significant and shifting role during the pandemic [1], informing our understanding of COVID-19 [2, 3, 4, 5, 6] and guiding decision making along care pathways. Clinicians have identified characteristic features of COVID-related pneumonia; such features can be used to differentiate sufferers of COVID-associated respiratory syndrome from those suffering other respiratory conditions [4, 7, 8]. However, these differences in disease manifestation are often subtle [9] and may be more quantitatively delineated using computational methods.

One corollary of the widespread adoption of radiology during the pandemic is the accumulation of large volumes of clinical imaging data spread across hospital sites throughout the UK. The National COVID-19 Chest Imaging Database (NCCID) was established to collate this mass of X-ray, CT and MRI scans into an accessible imaging database, in a similar vein to other data sharing initiatives motivated by the pandemic [10, 11, 12]. The end goal of the NCCID is to facilitate researchers and technology developers in the creation of fair, effective and generalisable machine learning (ML) technologies that ultimately aid clinicians to improve patient outcomes. Such technologies may include: diagnostic models that differentiate COVID from non-COVID respiratory conditions [13, 14] or prognostic models that leverage longitudinal data to stratify risk of mortality, inform treatment pathways, and predict length of stay [15, 16, 17, 18].

A broader aim of the initiative is to provide a blueprint for future national imaging initiatives within centralised health-care systems, positing secure, automated tooling for curating large volumes of imaging data from the point of care. The resulting high quality, well maintained databases may be the key to unlocking effective and robust application of machine learning models in the clinical setting. Such resources are guaranteed to represent the types of imaging machinery and cohorts expected for the clinical use case. Whilst also mitigating many of the common pitfalls hindering the efficacy of ML models in this domain, such as, information leaks between training and validation data cause by combining disparate data sources [19].

The initiative was formed as part of the NHS AI lab's mission of enabling the safe adoption of AI technologies in the NHS [20] and was successfully set up through partnerships with the Royal Surrey NHS Foundation Trust (RSNFT), the British Soci-

ety of Thoracic Imaging (BSTI) and Faculty, an AI technology company. This combination of data processing and clinical expertise has been leveraged to create a data warehouse comprising pseudonymised thoracic imaging and relevant clinical data points for thousands of patients across the UK. Further information on the NCCID's remit and rationale are described in an article in the European Respiratory Journal [21].

A portion of the incoming data is transferred to the training set, which contained 24,465 imaging studies from 7,685 patients at time of writing (latest figures can be found on the NCCID [information page](#)). The remaining portion of data is allocated to the validation set, which is protected as a hold-out set for NHSX to conduct future performance assessments of COVID-19 chest-imaging AI technologies, ensuring that they are safe and effective before procuring for real-world deployment. Findings presented in this paper are solely focused on the training data, in order to maintain the integrity of the validation data as a hold-out benchmarking tool.

This manuscript is targeted to technical users who wish to access the database for purposes of developing and validating software, as such, the core aim is to describe key characteristics of the data and highlight technical considerations such as model confounders and potential sources of bias. As the data is submitted in two parts - the images themselves, and the clinical data separately - the analysis has naturally been structured in this manner with an additional investigation of how the geographic, demographic and temporal coverage of the dataset compares with publicly available data for UK COVID-19 hospital admissions and mortality rates. The implications of these findings for developing algorithms related to COVID-19 are discussed, alongside a list of future aims that have been identified to improve the database.

The work was conducted on pseudonymised data within the existing NHSE AWS cloud infrastructure for the NCCID. To preserve the privacy of individuals, suppression of small numbers has been implemented throughout the paper. Suppressed data is indicated within plots and tables by the presence of an asterisk (\*) for categories containing less than 7 individuals. All data shared through the NCCID has received ethical approval by the UK Health Research Authority and has been reviewed by NHS Information Governance.

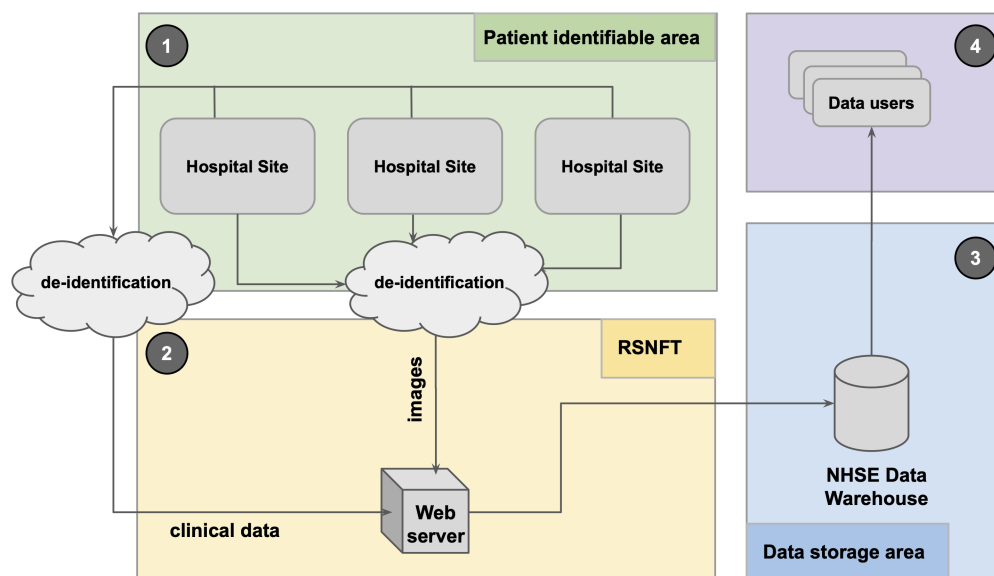

Figure 1. Diagram of the data collection pipeline for the NCCID warehouse.

## Methods

### Database Setup

Figure 1 provides an overview of the data collection pipeline for the NCCID warehouse, which can be broadly broken down into the following stages:

- i. NCCID participating collection sites (hospitals) are requested to contribute imaging data for patients that have undergone a real-time Reverse Transcription Polymerase Chain Reaction (RT-PCR) test for COVID-19. In addition to the images, two spreadsheets with different fields for the positive and negative cases are populated to capture accompanying clinical data (see clinical data and supplementary resources for more information).
- ii. The Scientific Computing Team at RSNFT have established a dedicated node on Sectra's Image Exchange Portal (IEP) for receiving the images. IEP is a widely used network for sharing images between hospitals. The images are received by a SMART box (Secure Medical-Image Anonymiser Receiver for Trials) in Random Access Memory (RAM) and de-identified before writing to disk, ensuring that no patient identifiable information leaves the sites. The clinical data spreadsheet is also de-identified by means of a common pseudonym, generated via a one-way hashing algorithm combined with a complex salt and uploaded to a web portal. Upon receiving images and clinical information, RSNFT links the two sources using the pseudonym. Patient's unique digital identifiers (NHS number or equivalent for devolved nations) are also encrypted using an Advanced Encryption Standard (AES) algorithm and a complex salt to allow linkage with other national-level datasets.
- iii. The data is transferred to a central NCCID data warehouse hosted inside NHS England's (NHSE) Amazon Web Services (AWS) infrastructure, designed and implemented by Faculty and NHXS. The warehouse is backed by a single Simple Storage Service (S3) bucket within a separate sub-account under NHSE's AWS organisation. All data within the S3 bucket is encrypted at rest using AES-256 encryption. Data is regularly split into training and validation sets based on a randomisation of patients: once a patient has entered the training or validation set, any new images for that patient are automatically added to the same set. The codebase for warehouse infrastructure is open-source (see Code Availability).
- iv. Data users that have been approved through the Data Access Request (DAR) process can access the training set. Image files are available in DICOM format, and clinical data is stored in JSON format. AWS credentials for the S3 bucket are provided to an organisation via an encrypted communication. Further support, including guidelines and code for access the data are provided through the [information site](#)

### Inclusion Criteria

The inclusion criteria for individuals within the NCCID database are as follows:

- The person has undergone a COVID-19 swab test (RT-PCR), this serves as a proxy for "suspected of COVID-19" providing a relevant population. The outcome of the test may have

been positive or negative. Some individuals may have undergone multiple swab tests;

- The person has undergone chest imaging in the three weeks before or after the swab. This time-frame was chosen to exclude people who have had imaging a substantial amount of time before or after their COVID-19 infection, limiting data capture to imaging that is contextual to the problem.

The positive cohort consists of the individuals that returned one or more positive swab tests. All imaging data associated with a positive patient's COVID-19 hospital episode have been requested. To provide insight on longitudinal risk factors, historical images up to January 2017 were also requested.

The negative cohort consists of individuals for whom all acquired swab tests return negative. This may differ from some clinical databases where the control cohort represents healthy individuals but was deemed the correct method for curating a dataset that could train the most useful models that differentiate COVID-19 characteristic features from other respiratory conditions. Thoracic images acquired within the six-week window surrounding the negative test were requested.

Although the status of a patient's RT-PCR swab test serves as a proxy for ground truth, users should be aware of the limitations of these labels. In particular, this method of testing has a relatively low sensitivity score, where estimates range from 0.71-0.98 [22], this causes the false omission rate to be quite high. In addition, the probability of having a COVID-19 infection is higher in those attending hospital with respiratory symptoms, than for the general public. Given these factors, data users should expect the negative cohort to contain a non-negligible portion of mislabelled positive patients. Additional clinical assessment of the images may be required to improve the accuracy of labels.

### Imaging Data

The NCCID is a continually growing asset, as such, all subsequent figures and analyses reported in this paper refer to the training data as of 29 October 2020 (unless otherwise stated). On this date, the NCCID training dataset contained data for 7,500 patients; Table 1 details how this cohort is split by control/disease and data availability. There were 1,307 patients with clinical data only due to the fact that the accompanying images had not yet been uploaded by the PACS teams.

Table 2 details the image modality breakdown for the patients that have had their imaging data uploaded to the training dataset. The majority of the image studies (see glossary in Appendix A for definition) in the NCCID are X-rays, followed by CTs. Only a small number of MRIs, 17, have been submitted, therefore MRI data is excluded from further analysis. A single patient may have multiple studies within the NCCID, for instance, if multiple diagnostic scans were taken during their treatment pathway or historic scans were provided (see image characteristics section for more details).

### Clinical Data

The NCCID sites have been asked to provide additional clinical information alongside imaging data for any patients that have tested positively for COVID-19 via the RT-PCR swab test. The

**Table 1.** Breakdown of patient cohorts

| PCR-RT swab status: | Patients with images and clinical data: | Patients with clinical data only | Totals:      |
|---------------------|-----------------------------------------|----------------------------------|--------------|
| Positive patients   | 2,881                                   | 287                              | 3,168        |
| Negative patients   | 3,312                                   | 1,020                            | 4,332        |
| <b>Totals:</b>      | <b>6,193</b>                            | <b>1,307</b>                     | <b>7,500</b> |

**Table 2.** Modality breakdown of image studies by patient cohort

| PCR-RT swab status | No. of X-ray studies | No. of CT studies | Totals        |
|--------------------|----------------------|-------------------|---------------|
| Positive patients  | 11,725               | 1,565             | 13,294        |
| Negative patients  | 5,532                | 1,112             | 6,651         |
| <b>Totals:</b>     | <b>17,257</b>        | <b>2,677</b>      | <b>19,945</b> |

intended purpose of this additional information is to provide researchers with insight into potential causal risk factors, such as comorbidities, as well as potential variables that indicate severity of disease. The clinical data can be broken down into five broad categories:

- i. *Demographic information* – age, sex, ethnicity. This data is discussed in detail in the demographics section.
- ii. *Important dates* – such as swab dates, image dates and date of admission.
- iii. *Patient medical history*, specifying any pre-existing conditions, and the current use of some drugs such as blood pressure medications.
- iv. *Admission metrics*, detailing the condition of the patient on admission to hospital i.e., blood pressure, lymphocyte count, partial pressure of O<sub>2</sub> etc.
- v. *COVID information*, pertaining to how the patient was treated (intubation, admitted to Intensive Therapy Unit (ITU)), the results of their RT-PCR-tests, the severity associated with their chest X-ray [23], and their ultimate COVID and mortality status.

For patients in the control cohort, only a subset of this information was requested: patient pseudonym, submitting centre, date of RT-PCR, and result of RT-PCR. This decision was made to reduce the burden on busy ward staff during the pandemic. Schemas for both spreadsheets are available through the supplementary resources section.

Initial investigation of the clinical data revealed several data quality issues, as can be expected during a pandemic when resources and time are understandably limited. Issues included: non-numeric values, such as blank spaces reported for numeric fields; inconsistency of date/time formats with some entries in US (month-day-year) versus UK (day-month-year) format; mismatch in format for reporting categorical data (e.g., M, F for Male, Female versus 0, 1); different sites using different unit scales to report clinical metrics, e.g., mg/L versus ng/L. To address many of these issues a data cleaning pipeline was created and made publicly available to data users, alongside additional details on the data quality issues, and guidance on the expected format of the clinical data fields (see supplementary resources section).

Missing values in the demographic data were backfilled using a segmentation dataset provided by NHS England and Improvement (NHSEI) for ethnicity data (internal resource, citation pending), and DICOM header information for sex and age. Making these sensitive attributes available to users is vital for measuring and facilitating equality of care, particularly through bias mitigation of ML models. As such, the additional source of ethnicity data has also been made available to data users.

The results that are reported in this paper are based on the cleaned data for which known errors, such as non-numerical entries have been removed. Text input has been parsed to extract embedded numeric values, and categorical values have been mapped to standard schemas. Issues arising from ambiguous dates (i.e., 03/04 vs 04/03) and mixed measurement units have not been fully rectified by the cleaning pipeline and may persist.

## Data Validation

The following analyses are provided to aid data users in understanding the suitability of the NCCID training dataset for developing diagnostic and prognostic algorithms based on COVID-19 chest imaging:

- i. *Clinical data completeness*: assess the completeness and quality of the clinical data, particularly in relation to pertinent information (e.g., comorbidities, disease severity, outcomes) that can provide additional training variables or labels for ML models.
- ii. *Imaging characteristics*: considers the availability of historical data for longitudinal studies, the implications of the timing of image acquisition along care pathways, and potential model confounders such as the scanner type.
- iii. *Cohort analysis*: to inform NCCID users of any potential biases in the training dataset that could impede their ability to develop fair, effective, and generalisable AI models. To achieve this, we compared the geographic, demographic, and temporal distributions of patients in the NCCID with publicly available datasets, measuring how far the data is representative of the wider population that has been affected by COVID-19.

The subsequent sections follow the structure of the above three categories, each containing a description of the methodology (if applicable) alongside the key results. The implications of these findings for building ML models are elaborated in the discussion section.

## Clinical data completeness

To understand the utility and limitations of the clinical data with respect to developing diagnostic or prognostic AI models, we assessed the completeness of each field in the four categories: important dates, patient medical history, admission metrics, and COVID information. Completeness was quantified in terms of the percentage of null and not-null values submitted for each field across all COVID-positive patients.

Figure 2 A–D show the completeness of the clinical data after applying the cleaning pipeline (see the clinical data methodology section). For each field of the clinical data, the percentage of entries with non-null values are shown in orange against the percentage of null values in blue. The data exhibits varying degrees of completeness with several well-reported fields present in over 80% of patients, but the majority of fields are between 0%–50% complete. The subsequent subsections investigate each plot more closely.

### Dates

The date of 1st PCR result, positive COVID swab, latest COVID swab, admission, and 1st chest X-ray (CXR) were well reported, with 79–97% coverage, whilst dates of subsequent PCR tests/results, X-rays, ITU admission, intubation and death were present for just 4–50% of patients. Coverage for date of death increased from 14.6% to 66% when limiting analysis to the subset of patients for whom the death status had also been reported as positive.

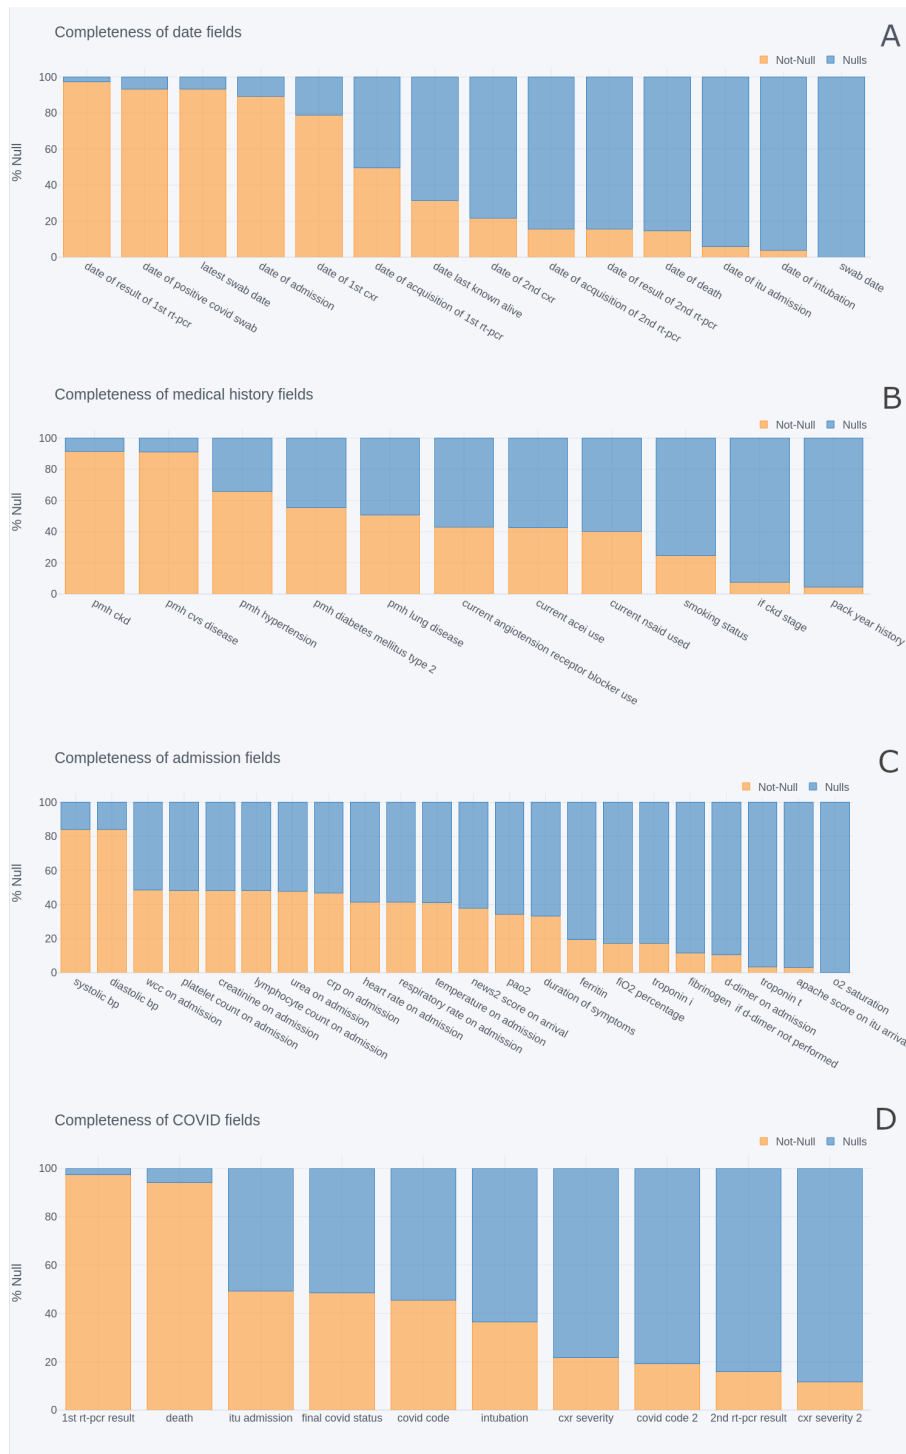

**Figure 2.** Completeness of clinical data fields related to (A) dates, (B) patient medical history, (C) symptoms on admissions and (D) COVID-related information.

### Medical history

The presence or absence of cardiovascular disease (CVS) and chronic kidney diseases (CKD) were both reported for approximately 90% of patients. The presence of other pre-existing conditions, hypertension, type 2 diabetes mellitus, and lung diseases were reported for 66%, 55% and 51% of patients, respectively. The use of angiotensin receptor blockers, ACE inhibitors (ACEI), and non-steroidal anti-inflammatory drugs (NSAID) were known for between 40–43% of patients. The patient's smoking status (never, previous, current) was known for 25% of patients, with the packs per year history known for 4.4%, increasing to 25% when filtering for patients with cur-

rent or previous smoking status. Finally, the stage of chronic kidney disease (if CKD, stage) was available for 7.5% of patients overall, rising to 49% in the subset in which CKD is reported.

For all of these fields other than pack year history and CKD stage, the reporting includes the negative status of not having the condition. Missing values include that the presence of the condition was marked as unknown or left blank.

### Admission metrics

Of the clinical measurements recorded when a patient is admitted to hospital, blood pressure (systolic and diastolic) was available for 84% of patients and was by far the most complete



field in this category. The majority of remaining fields were reported for between 33–48% of patients. However, Ferritin, FiO<sub>2</sub>, Troponin I, Fibrinogen, and D-dimer were reported for 10–19% of patients, and Troponin T, APACHE score and O<sub>2</sub> saturation for only 1–3% of patients.

#### COVID information

The most complete COVID information by far was the result of the 1st PCR test and death status, which were present for 97% and 94% of patients respectively. Admission to ITU, final COVID status and COVID code were reported for 45–49% of patients, and use of intubation for 36%. Beyond these the completeness of the fields declined, with chest X-ray severity data available for 21% of patients, COVID code 2 for 19%, result of second PCR test for 16% and chest X-ray severity 2 for 11%.

#### Image characteristics

This section is designed to inform users on general characteristics of the image data whilst also highlighting potential confounders that might hinder the ability to build effective AI models.

Subsequent sections of the analysis utilise the DICOM header tags associated with image files, these tags were read using open-source package Pydicom [24]. MRI images are excluded from all analyses due to low numbers in the database at the time of analysis.

#### Historic and acute

Both acute (related to COVID-19 hospital admission) and historic image studies (up to January 2017) are available for a subset of the NCCID patients. Historic image studies may be used to infer longitudinal risk factors or decouple the effects of pre-existing pathologies from COVID-related symptoms.

Figure 3 shows the distributions of the number of historical/acute/total X-ray (A) and CT (B) studies per COVID-positive patient. This number was calculated based on the date of admission and the DICOM *StudyDate* (0008, 0020), where a study was considered acute if it occurs on or after the admission date and historic otherwise. Date of admission was available through the clinical data for n=2,826 COVID-positive patients; reported results are based on this sample size. In both sets of boxplots, outliers are indicated by dots outside the limit of the plot whiskers and whiskers correspond to Q1 or Q3 +/- 1.5\*iqr (interquartile range).

The total number of CTs per patient was median=1, iqr=1–2, this was lower than for X-rays (median=3, iqr=1–5). This consequently resulted in lower availability of acute CT studies, median=1, iqr=0–1, max=6, and even lower availability of historic CT studies, median=0, iqr=0–1, but with a handful of patients having 2–12 studies. For X-rays the median number of acute studies per patient was 1, similar to CT but the iqr=1–2 is higher, indicating that patients are more likely to have multiple X-rays taken in the acute setting. There was also more historic data available for X-rays, with a median=1, iqr=0–2.

#### Acquisition timing

The timing of imaging acquisition along the patient treatment pathway was investigated to understand if different modalities were used for differing purposes in the clinical setting. Two time lags were compared across X-ray studies and CT studies:

$$D_1 = date_{image} - date_{positiveSwabTaken} \quad (1)$$

$$D_2 = day_{image} - (date_{admission} - days_{durationOfSymptoms}) \quad (2)$$

Image dates were established from the *StudyDate* field of the DICOM headers and lags were calculated based on the first image after the admission date of each patient. This limited analysis to the images taken during the patient's treatment for COVID-19 in the acute setting. Box plots are used because of the skewed nature of timing data. The distributions of these lags are shown for X-ray (orange) and CT (blue) scans in Figure 4 A and B.

For A), the median offset between swab date and study date was -1 day for X-rays and +1 day for CT scans. The high number of -1 day lags for X-ray shows that the majority of X-rays had been taken before a patient's COVID-19 status was known. The overall distribution across X-rays was far narrower, with an iqr= -2–0 compared to iqr= -1–12 for CTs. This suggests that the timing of X-rays is very consistent across patients, whereas longer tails in the CT distribution indicates more variance of usage between patients.

Both modalities display outliers with large negative offsets. These negative offsets suggest that some patients had images taken up to 87 days prior to the positive RT-PCR swab. In practice, the majority of these cases are likely driven by data quality issues surrounding ambiguous dates, such as 03/10 vs 10/03.

The delay between onset of symptoms and image dates tell a similar story to the above. X-rays had a median offset of 7 days (iqr = 3–11 days), whilst CTs had a median offset of 15 days and a wider iqr = 8 – 34 days. Although calculated on a smaller subset of studies (936 compared to 2917) for which duration of symptoms data was available, this analysis corroborates the hypothesis that X-rays were consistently used earlier in the care pathway, potentially as diagnostic aids.

#### Scanner Types

To investigate the variety of medical imaging equipment within the NCCID database, two analyses were performed:

- Study counts by machine manufacturer were generated using the *Manufacturer* attribute (0008, 0070) from the DICOM headers.
- Study counts for model types available within each manufacturer were generated through the combination of DICOM attributes *Manufacturer* + *Manufacturer's Model Name* (0008, 1090). This combined attribute is hereby referred to as model. The results for this additional breakdown are provided in Appendix B.

In both cases, all available DICOM tags were read from each X-ray image file in a study, but only from the first file of each CT study, as the DICOM attributes of interest were the same across all files in a given CT study. Studies for the positive cohort were filtered to exclude historical data based on *DICOM Acquisition Date* (0008, 0022) and date of admission.

#### Manufacturers

The counts of scanner manufacturers across NCCID positive (orange) and control (blue) cohorts are displayed in Figure 5, where ordering of manufacturers is based on the total counts (positive+negative). The total, non-historic, study counts across all manufacturers were 11,086 (*positive* = 5552, *negative* = 5534) for X-ray and 1746 (*positive* = 634, *negative* = 1112) for CT.

The largest suppliers for X-rays were Fujifilm, Siemens and Philips Medical Systems, which contributed 2687, 2588 and 2297 studies each. The next largest supplier was Carestream Health, with 1261 studies, after which the number of studies steadily declined for the remaining 8 suppliers. In the case of CT studies, Siemens far outweighed the other 4 providers, accounting for 1518 studies.

All X-ray and CT manufacturers had studies for both

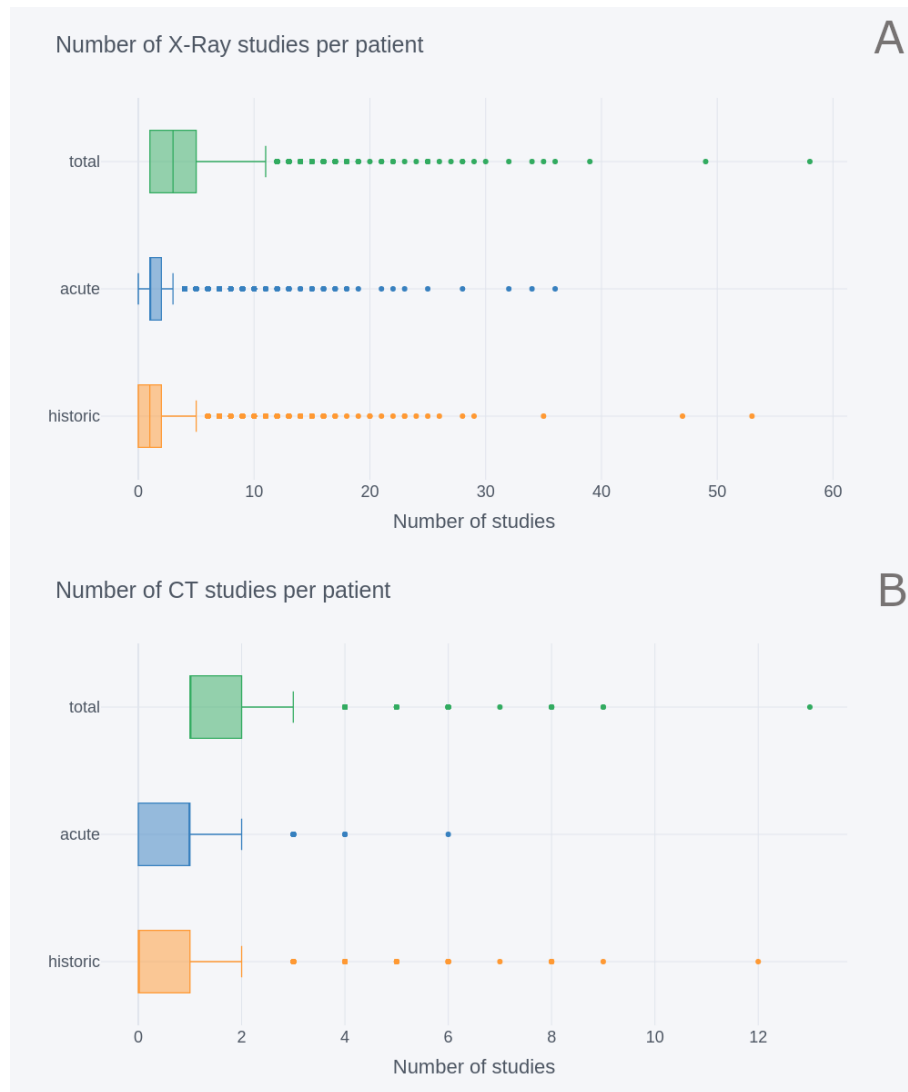

Figure 3. Number of historical/acute/total image studies per NCCID COVID-positive patient (n=2,826) for (A) X-rays and (B) CTs.

positive and negative patients. However, some manufacturers, such as Siemens, had significantly more studies in one of the two groups.

#### Portable versus stationary

It was suspected that X-ray data in the NCCID originates from a combination of portable and stationary machines. This was partly a consequence of operational restrictions caused by the pandemic, where portable scanners were easier to regularly disinfect and could be transported to dedicated COVID-19 wards as part of infection control procedures [3]. As such, the use of portable machines was expected to be more prevalent in the COVID-positive cohort of the NCCID.

The percentage of portable scanners was estimated to investigate the presence of potential model confounders caused by e.g., lower image resolution in portable scanners:

- Studies with references to portable, e.g., *CHEST PORTABLE* in the *Body Part Examined* attribute (0018, 0015) were counted. Different variations were mapped e.g., *PORT CHEST* to *CHEST PORTABLE*. Studies that did not include any reference to portable in this attribute were assumed to originate from stationary scanners.
- Counts were then adjusted by taking the unique set of eight models from the above step (highlighted in Table ?? of the

Appendix) and extrapolating the portable status to all studies acquired on these models, under the assumption that operators forgot to indicate portability in these cases.

Table 3 displays estimated portable machine counts within the NCCID training data, excluding historic images. For positive patients, there were 78 studies labelled with some reference to portable in their Body Part Examined DICOM attribute (original counts), accounting for approximately 1.4% of X-ray studies. In comparison, the number of portable machines indicated by this DICOM attribute accounted for 0.9% of negative patient studies. After extrapolating the portable status to all studies taken on the models where portability was indicated at least once, the proportion of X-ray studies taken on portable devices increased to approximately 14.3% for positive patients and 16.7% for negatives (adjusted counts).

#### Cohort Analysis

This section explores the geographic, demographic and temporal coverage of the NCCID database. The aim is to measure if/how the NCCID differs from the general COVID-affected population and how any disparities might limit the generalisability of AI solutions.

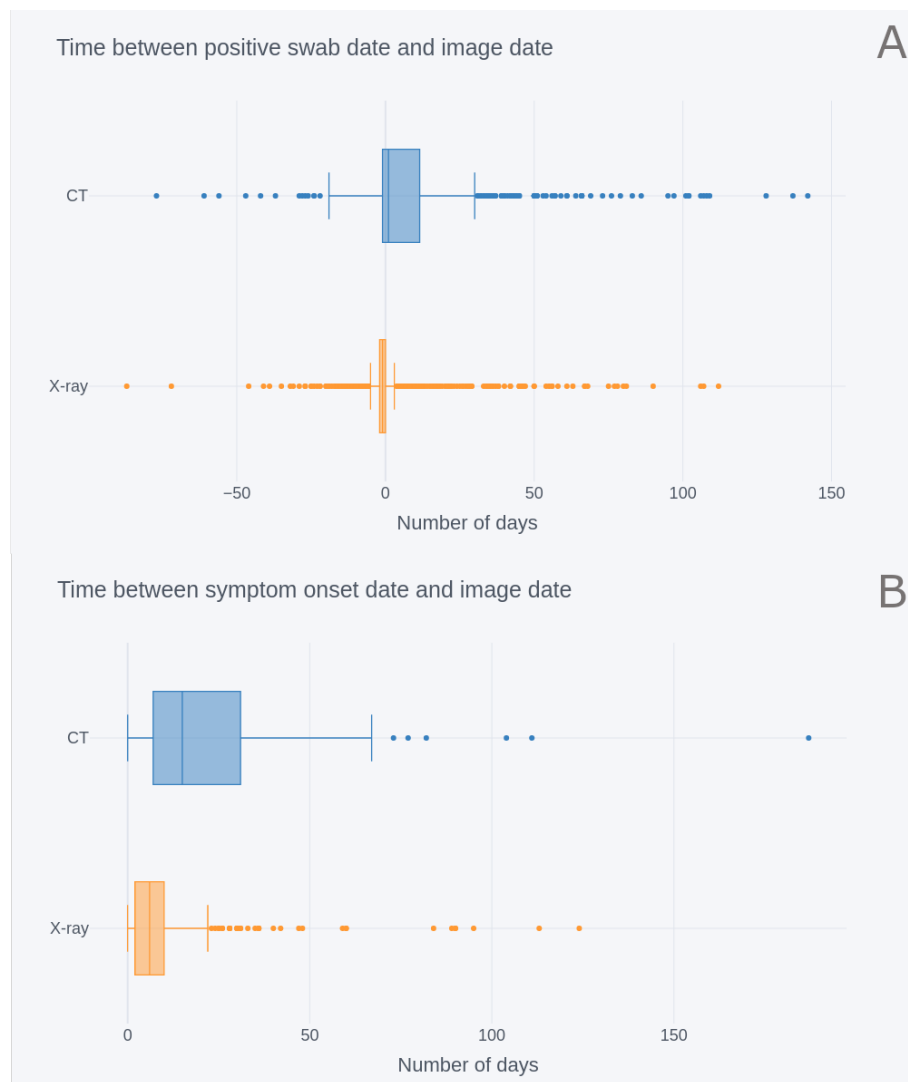

**Figure 4.** (A) Number of days between the patient's RT-PCR swab test and the image acquisition ( $n_{XRAY} = 2,410$ ,  $n_{CT} = 507$ ) and (B) Number of days between patient symptom onset and image acquisition ( $n_{XRAY} = 803$ ,  $n_{CT} = 133$ )

**Table 3.** Estimated number of X-ray studies originating from either stationary or portable machines for COVID positive and negative patients.

| Scanner type | COVID-positive |                | COVID-negative |                |
|--------------|----------------|----------------|----------------|----------------|
|              | original count | adjusted count | original count | adjusted count |
| stationary   | 5489 (98.6%)   | 4770 (85.7%)   | 5490 (99.1%)   | 4610 (83.3%)   |
| portable     | 78 (1.4%)      | 795 (14.3%)    | 49 (0.9%)      | 927 (16.7%)    |

### Geographic Coverage

Figure 6 details the number of patients submitted to the NCCID from each NHS England region [25] and Wales, split by their confirmed COVID-19 status, as measured via a RT-PCR swab test (positive = orange, negative = blue). The regional data were aggregated from the 19 sites that had submitted data by the analysis cut-off date.

In addition, Figure 7 displays two choropleth maps showing (A) the proportion of COVID-19 hospital admissions, within each NHS England region and Wales, as reported by Public Health England [26] and (B) the proportion of COVID-19 positive patients in the NCCID for the same geographic boundaries. Boundary data was sourced from the ONS geoportal [27].

The highest proportion of data originated from the East of England region, which accounted for 2,134 patients in total. However, the vast majority of these (1,862) were negative patients, submitted by a single site. The second highest reporting region was the Midlands, with a combined total of 1,769 pa-

tients in the database. In contrast to the East of England, the vast majority of patients submitted in the Midlands were positive cases (1,638), and 1,511 of these originated from a single site.

Other regions submitted less data overall, but regions in the South of England (including London) and Wales had comparatively even contributions of positive and negative cases. Coverage of positive cases in the North of England and Yorkshire was limited, with the North East and Yorkshire region having only 33 patients in total.

The NCCID's geographic coverage of COVID-19 patients was largely concentrated in the Midlands, accounting for 54.8% of positive patients in the training data. After the Midlands, the East of England, London, South East and South West of England accounted for 41.6% of positive patients in total (9.2%, 10.2%, 10.5%, and 11.7%, respectively). Data from Wales, the North West, and the North East and Yorkshire regions collectively made up just 3.6% of NCCID positive patients.



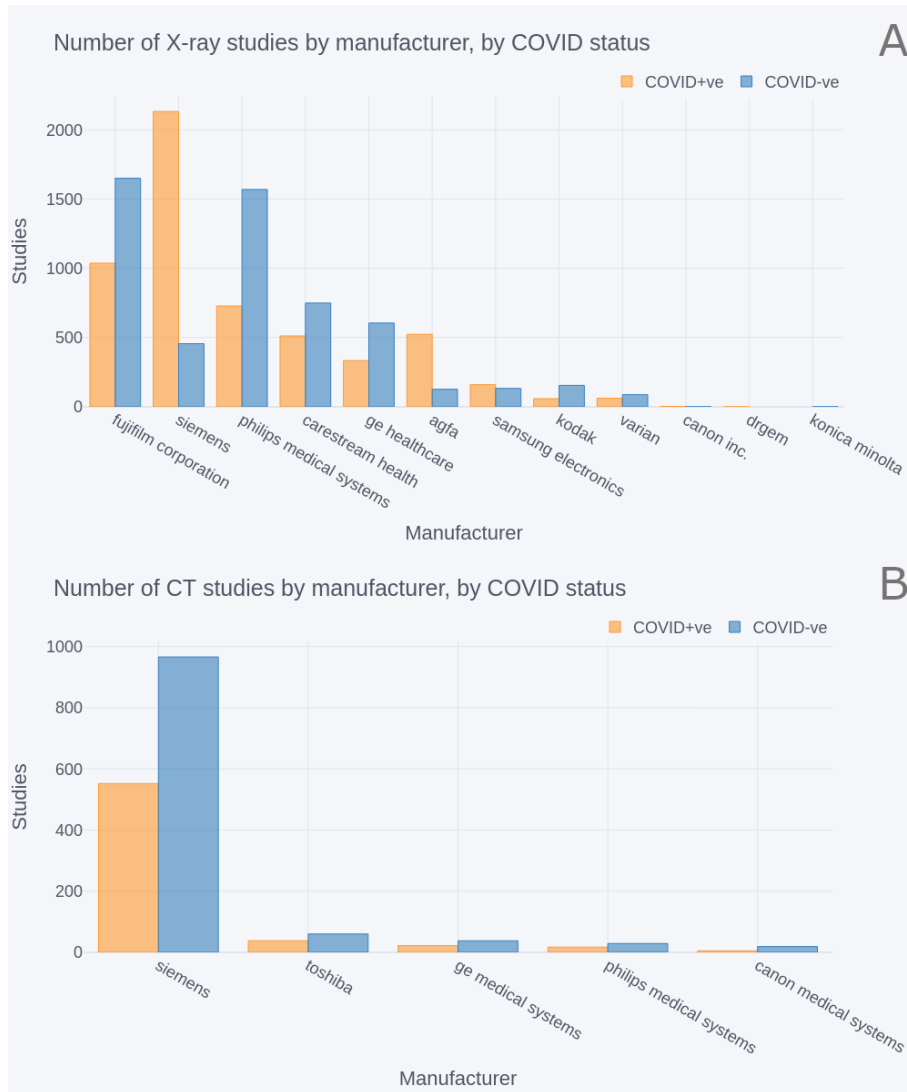

**Figure 5.** Number of COVID-positive and negative (A) X-ray studies by manufacturer and (B) CT studies by manufacturer. In both cases the manufacturers are ordered by highest to lowest total (positive+negative) number of studies

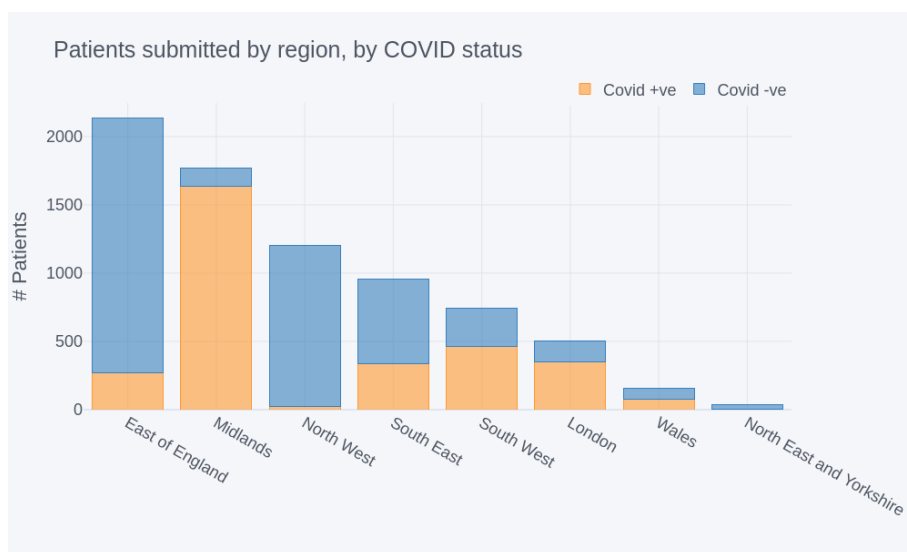

**Figure 6.** NCCID positive and negative patients submitted by region, sorted by total contribution.

This was at odds with COVID-19 hospital admissions (as reported by PHE) which were more evenly spread across England

and Wales. Specifically, London, the Midlands, North East and Yorkshire and the North West accounted for approximately 15-

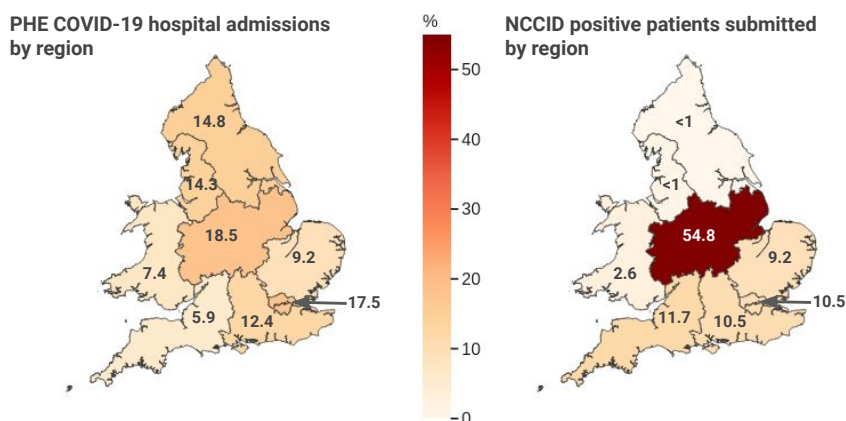

Figure 7. Comparison of national COVID-19 admissions at a regional level with NCCID positive cases.

18% of admissions each. Wales, the South East, East of England and South West accounted for smaller proportions of 10.3%, 9.8%, 7.0% and 5.1% of admissions, respectively.

#### Demographic Coverage

The purpose of this section is to establish how generally representative the NCCID cohort is of the population hospitalised due to COVID-19 and whether good representation carries through to the most severe outcomes (through the mortality variable). Understanding the underlying causes of any demographic differences in COVID-19 prevalence or outcomes is beyond the scope of this paper.

Subsequent to applying the cleaning and merging pipeline (see clinical data methods section), demographic data was available for sex=85%, ethnicity=69%, and age=86% of patients in the NCCID ( $n=3,168$ ). Distributions of these categories within the NCCID were compared against reference datasets, where available, or COVID-related statistics reported by the International Severe Acute Respiratory and Emerging Infection Consortium (ISARIC) [28, 29] and the general UK population reported by the 2011 national census. Equivalent comparative data was not publicly available for Wales, as such, data from Welsh health boards is excluded from the subsequent demographic results. Comparisons were made for both admissions and mortality rates where the total sample size of patients with recorded deaths was  $n=694$ . In all subsequent comparison plots the NCCID is indicated using blue and comparative datasets are displayed in orange and green.

The NCCID is a subsample of the population that is hospitalised due to COVID-19, and a dynamic resource that will continue to grow over the coming months. It is sensible to assume that the sample of NCCID data being scrutinised in this paper will deviate from the final population of both the NCCID and general COVID-affected population. To account for some of this sampling error in the below comparisons, we applied a bootstrap method to generate confidence intervals for the NCCID data. The plotted proportions of a given category, e.g., percentage of patients aged 18–64, represent the median percentage across 1000 bootstrap samples. Similarly, error bars on the subsequent plots represent the 95% confidence interval (ci) of measurements across the bootstrap samples. In each case, the sample size of the bootstrapped distributions was equal to the size of the relevant original NCCID sample (i.e., if the original NCCID sample had  $n=3000$  patients with sex data available then the bootstrapped samples each contained  $n=3000$  entries).

#### Sex

Figure 8A compares the split of male ( $n = 1,797$ ) and female ( $n = 1,295$ ) positive cases within the NCCID to that of the general UK population via the 2011 national census [30]  $n = 63,182,000$ , and the COVID-affected population reported by ISARIC [28],  $n = 20,113$ . At 58% male to 42% female (ci = 56–60%male:40–44%female), the NCCID was more closely aligned to the 60:40 ratio reported in COVID-19 admissions than the 51:49 split of the general UK population.

Figure 8B compares the male:female mortality rates within the NCCID cohort ( $n=673$ ) against those reported by NHSE ( $n=32,483$ ), up to the cut-off date, 29/10/2020 [31]. The NHSE mortality data exhibited a male to female ratio of 61:39. This fell within the 95% confidence interval for the NCCID, 60–67%:33–40%.

#### Ethnicity

Figure 9A compares the ethnicity proportions (Asian, Black, Other, White) of NCCID patients,  $n=2854$ , against the general UK population as reported in the 2011 UK census,  $n=63,182,000$ , [30] and the COVID-affected population reported by ISARIC,  $n=30,693$  [29].

The White group accounted for 83% of individuals in both the census and ISARIC populations. In contrast, only 72% (ci = 70–73%) of NCCID COVID-positive patients were from White ethnic backgrounds. This was counterbalanced by higher proportions of Asian (median=14%, ci=13–16%) and Black (median=9%, ci=8–10%) people, than observed in either the Census (Asian = 9%, Black = 3%) or ISARIC (Asian = 5%, Black = 4%). In addition, ISARIC reported higher proportions of patients from Other minority backgrounds (8%) than in NCCID (median=5%, ci=4–6%), whilst the census data indicated that approximately 4% of the UK population belonged to this group.

Figure 9B compares the ethnicity proportions within the subset of NCCID patients that have recorded deaths and ethnicity data ( $n=633$ ) to the ethnicity proportions reported by NHSE for COVID-19 in-hospital deaths in England [31], up to the reporting cut-off date ( $n=29,610$ ).

Similar to the admissions data above, the NCCID mortality data was under-representative of the White ethnic group (median=78% ci=74–81%), and over-representative of the Asian (median=11%, ci=9–13%) and Black (median=8%, ci=6–10%) groups, compared to mortality rates in the broader COVID-population (White=85%, Asian=8%, Black=5%).

#### Age

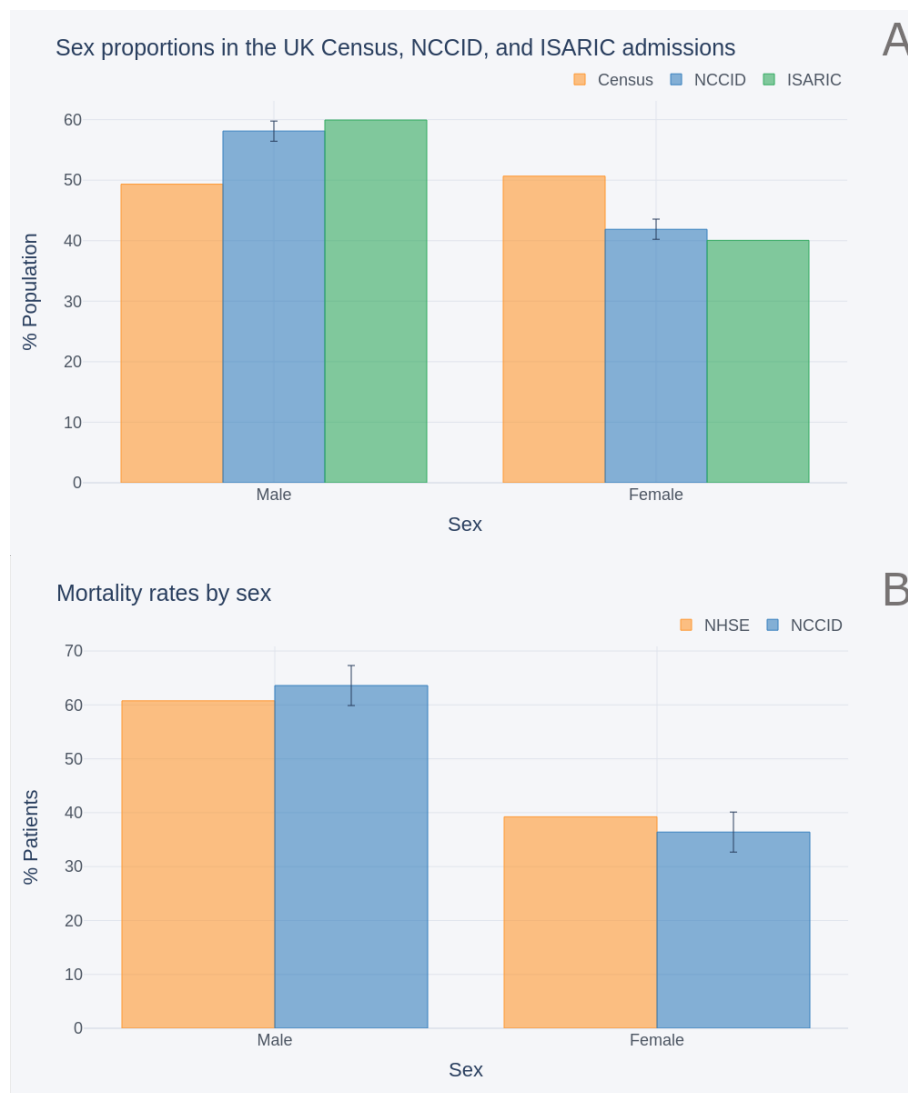

**Figure 8.** Comparison of sex split within: (A) the NCCID COVID-19 patients, the general UK population (as reported in the 2011 census) and COVID-19 hospital admissions (reported by ISARIC); (B) NCCID recorded deaths and NHS England COVID-19 hospital mortality data.

Figure 10 compares the percentage of NCCID patients within a set of age bands (0-5, 6-17, 18-64, 65-85, 85+) to the percentages for COVID-19 hospital admissions across England, as reported by Public Health England [26]. The comparisons are shown at both the national level as well as within each NHS England region.

As reflected in the geographic analysis, regions in the North of England had insufficient data to make meaningful comparisons. Specifically, data availability was below the suppression threshold in all age groups for the North East and Yorkshire and most age groups for the North West. The error bars for the remaining age groups in the North West, 18-64, and 65-85, spanned 30-34 percentage points respectively.

Amongst the regions that had enough data to support comparisons, most showed no statistically significant differences between the NCCID and PHE. For London ( $n_{PHE} = 25,804$ ,  $n_{NCCID} = 353$ ) and the South East ( $n_{PHE} = 15,690$ ,  $n_{NCCID} = 335$ ) PHE data fell within the NCCID confidence intervals for all age-groups. The two data sets were closely aligned in the South West ( $n_{PHE} = 26,876$ ,  $n_{NCCID} = 463$ ), where only the 18-64 and 65-85 age bands fell outside the confidence interval by just 1% each. Similarly, in the East of England ( $n_{PHE} = 11,252$ ,  $n_{NCCID} = 272$ ), the PHE data for the 18-64 age group was again just 1% outside the upper bound for the NCCID, and all other age bands

fell within the confidence interval.

The single exception was the Midlands, which exhibited a large difference of 18% (ci=15-20%) between PHE ( $n=26,661$ ) records and the NCCID ( $n=1638$ ) for the 18-64 age band. This was counterbalanced by smaller proportions of over 65s than observed by PHE. These deviations can be reasonably attributed to the fact that data was collected by a single site, located in an urban area. Furthermore, given that the Midlands contributed a substantial volume of positive patients to the NCCID, this overrepresentation of 18-64 year olds extended to the national level comparison ( $median_{NCCID} = 42\%$ ,  $ci = 40-43\%$ ,  $n_{NCCID} = 3088$ ,  $median_{PHE} = 33.7\%$ ,  $n_{PHE} = 137,757$ ).

The NCCID had low numbers of patients in the 0-5 group at a national level, and low numbers for the 6-17 group in all geographies.

Figure 11 compares age breakdown of NCCID patients with recorded deaths to age breakdowns of in-hospital COVID-related deaths reported by NHSE [31]. A different set of age bands were used to align to the NHSE data: 0 - 19, 20 - 39, 40 - 59, 60 - 79, 80+.

Although the age bands used by NHSE ( $n=32,484$ ) are different to those used in the admissions comparisons above, we can see a general knock-on effect, where over-representation of younger people in the dataset resulted in a larger percent-

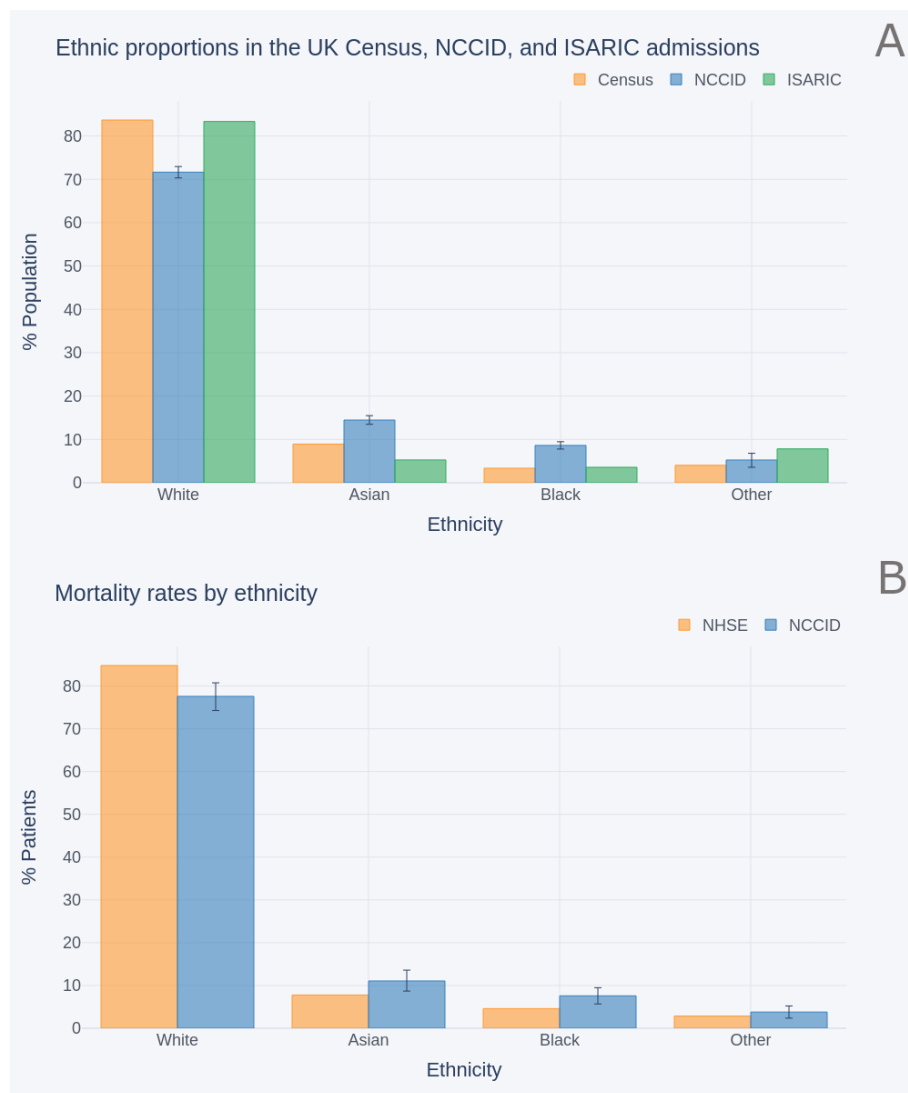

**Figure 9.** Comparison of ethnicity proportions within (A) the NCCID COVID-19 patients, the UK population (as reported in the 2011 national census) and COVID-19 hospital admissions (reported by ISARIC); (B) the NCCID recorded deaths and NHS England COVID-19 hospital mortality data.

age of 40–59 year olds with recorded deaths in the NCCID (median=10%, ci=8–13%, NHSE=7%).

#### Temporal Coverage

This section investigates the approximate hospital admission dates of the NCCID patients to identify how well the NCCID has captured patients across the course of the pandemic. The total number of NCCID patients with a positive RT-PCR swab test occurring each week since 1 March 2020 was compared to the total number of confirmed COVID-19 patients admitted to hospital each week for the same period according to PHE data [26]. This analysis was performed at a national level, including data across the whole of England and Wales. Given that there were (at the time of study) no NCCID sites in Scotland and Northern Ireland, data from these nations was omitted from PHE admissions calculations. The two time-series are displayed in Figure 12.

The peak of both datasets was aligned, occurring on 5 April, with a gradual decrease in numbers until the summer period, July to September 2020. From September onwards the national COVID-19 admissions began to rise again, however this was not (up to the analysis cut-off 29/10/20) reflected by a rise in positive patients admitted into the NCCID database.

## Re-use Potential

#### Findings of data completeness analysis

Clinical information is an important complement to the chest images. Gaps in the clinical information can deprive researchers of contextual data on the patient's health for inclusion in analyses and ML models. For instance, incompleteness of the  $FiO_2$  data may hinder the development of mortality or deterioration risk scores that take this field into account. Analogously, since clinical information may be used to control for confounders, missing entries can reduce a researcher's ability to draw firm conclusions from the data.

The overall availability of clinical data varies by each field in the dataset. Key dates including when the RT-PCR swab was taken and when a patient was admitted to hospital are well covered, and can provide useful insight into the timelines of image acquisition during the patient care pathway (e.g., Figure 4).

The occurrence of pre-existing conditions is also relatively well characterised, particularly for cardiovascular and kidney diseases. This information should allow data users to account for the effects of comorbidities in their analyses, which have been shown to play a significant role in disease outcomes for COVID-19 patients [32, 33, 34, 35].

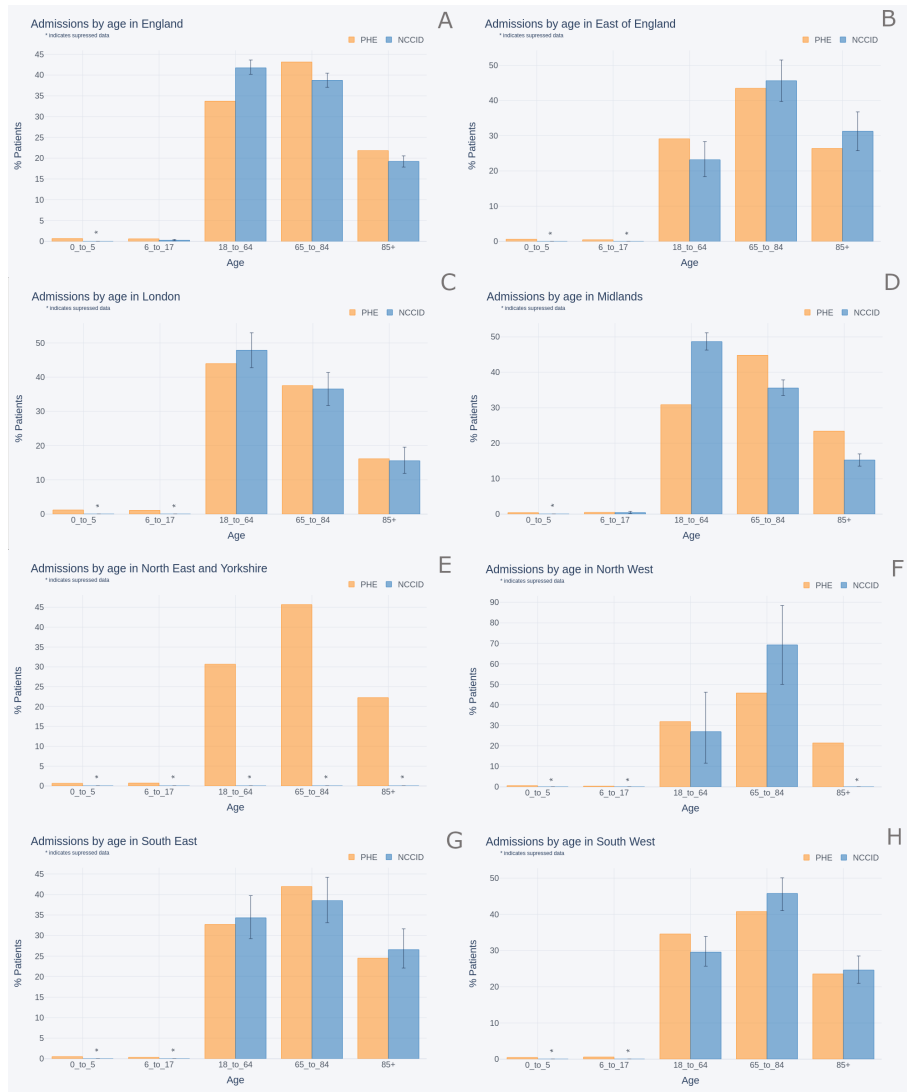

**Figure 10.** Comparison of age proportions between COVID-19 hospital admissions (reported by PHE) and NCCID positive patients for (A) England, (B) East of England, (C) London, (D) Midlands, (E) North East and Yorkshire, (F) North West (G) South East and (H) South West.

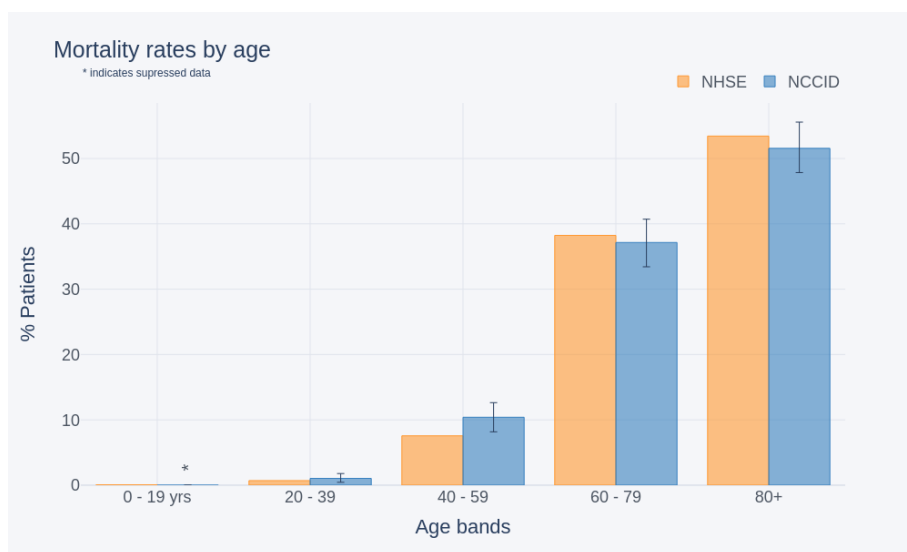

**Figure 11.** Comparison of age distributions between recorded COVID-19 deaths (as reported by NHSE) and the NCCID (England only).

Information relating to the patients' conditions upon hospital admission (e.g., blood pressure and white-cell count) were

the least well reported, with a mean of 65% null values in this category compared to 49% for dates, 53% for medical history,

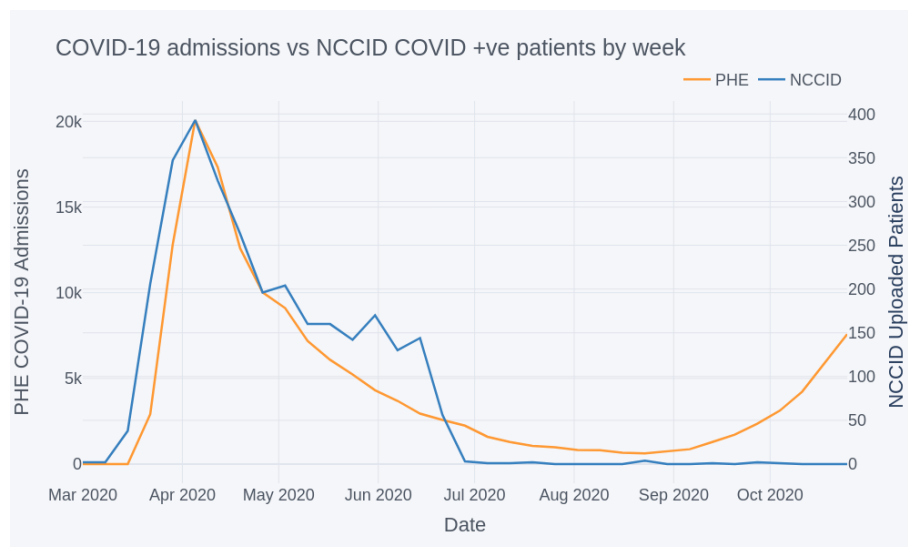

Figure 12. Comparison of COVID-19 admissions to NCCID positive cases by week.

and 56% for COVID-19 fields. Data users should also be aware that the reporting units for these metrics may vary between sites, making it difficult to disambiguate overlapping values, and causing artificially high variances for some metrics (Appendix C). To remedy this, we plan to make site-specific unit information available to users once collated, even though it is unlikely that all participating sites will be able to provide such information. It should also be noted that some of the missing data originates from the fact that specific hospitals do not commonly measure all of the listed metrics. For example, several sites report that they do not routinely measure *Troponin T* on admission. Furthermore, some fields such as O2 saturation are obsolete and no longer requested in the data collection spreadsheet.

Overall, the causes of missing information in the NCCID are difficult to identify because of their number and diversity. It is nevertheless known that the following factors have contributed to incompleteness of clinical data across the different categories:

- Staff at data-collection sites may have been unable to fill in certain fields due to time pressure and the emergency situation.
- Depending on the site, data has been gathered by staff (research nurses, radiologists, etc.) with access to different clinical information systems and records. Therefore, the person collecting and uploading data to the NCCID may have been unable to get hold of specific clinical information.
- Certain fields could only be present in a relevant subset of patients, and were otherwise left empty. For example, a few fields referred to secondary RT-PCR swab tests (*date of acquisition*, *date of result*, *result*) and secondary chest X-rays (*date*, *severity*), which were only required, and consequently filled in for some patients. Additionally, the reporting of date of death, and stage of chronic kidney disease were much higher when selecting the subset of patients for whom death or presence of kidney disease had been reported. Similar effects are likely to be the underlying cause of the relatively high occurrence of missing values in COVID-19 fields such as *ITU admission*, *intubation* and *severity of disease in secondary images*[23].
- Information such as medical history may not have been provided by the patient, for example because they were incapacitated.
- Data may not have been gathered as part of routine clinical

practice, see the above remarks.

Plans are in place to establish a link between the NCCID and ISARIC-4C [10] that will automatically populate clinical information for patients included in both datasets. This link aims to improve the availability of clinical data in the NCCID whilst relieving the burden on clinical staff to provide additional information.

#### Findings of image characteristics analysis

##### Historic and acute

The number of total, acute or historic image studies varied across COVID-positive patients. In general, patients were less likely to have historic CT data available (median=0 studies), compared to X-ray (median=1 study). This is likely driven by the general disparities in availability between the two modalities, given that X-rays are faster and cheaper to acquire, and are therefore more frequently used in the UK clinical setting. Investigators that wish to incorporate historical data as a means of accounting for pre-existing pathologies or understanding longitudinal risk factors should possibly focus on X-ray studies.

Both X-ray and CT had a median of 1 study per patient, but there were many more X-ray studies available overall (approximately 12,000 compared to 1,500). It is sensible that researchers building diagnostic tools should focus on X-ray data, as these are also likely to be most useful in the UK clinical setting. However, given that CTs are likely to be used in the more severe/difficult cases, those wishing to analyse disease severity/prognosis can utilise CT data. One advantage of the CT data is that it provides much richer imaging information, encoded into a 3D volume where different view planes and slices through the relevant anatomy can be probed. In comparison, X-ray image resolution tends to be higher but only a single projection is possible.

The total number of MRI studies is currently too low (17 studies) to be useful in the machine learning setting. This is likely to remain true even as the database grows, as low numbers are caused by the rarer adoption of MRI in the treatment of COVID-19 patients, which in turn, limits the clinical relevance of this modality.

##### Acquisition Timing

Analysis of image timings with respect to patient PCR-RT swab dates and onset of symptom dates revealed that X-rays



were predominantly used at the early stages of a patient's care pathway. Interestingly we identified the median offset between swab date and X-ray was -1 day, which suggests that X-rays were commonly being used as diagnostic aids. This is likely a result of limited testing capacity during the earlier stages of the pandemic. In contrast, CT images were generally used later in the care pathway, with greater variance between patients on the specific timing of scans. These findings reflect BSTI clinical guidelines for the UK, which stipulated that CT should be used sparingly as a diagnostic tool, to preserve capacity for normal operation [23].

Concentrating on the response to COVID-19 in the UK and the NCCID, data users may want to focus on building diagnostic tools using X-ray images, and could potentially use CT scans to study disease severity, progression and prognosis. It remains to be seen whether improved testing capacity or other factors will modify the timings for either modality in the later stages of the pandemic, and therefore change the technological needs of the response to COVID-19 in the UK.

### Scanner types

X-ray and CT images present in the NCCID were captured on a range of systems from multiple manufacturers, providing variability in the type of images available. This was true for both positive and negative patients, although the ratio of positive to negative varied somewhat by manufacturer. Users of NCCID should take into account the relative frequencies of imaging across the different manufacturers (and models) to minimise unwanted bias. For instance, Siemens is the dominant manufacturer for CT, but large amounts of X-ray data was available for a number of providers, which could help produce generalisable models.

Due to limitations imposed by the pandemic, it was suspected that imaging data in the NCCID would originate from a combination of portable and stationary X-ray machines. Portable machines are easier to quickly sanitise between sessions and could more readily be moved to quarantine wards as part of hospital infection control measures, making it possible that there would be a higher prevalence of such machines in the patient cohort [3]. Exploration of the DICOM headers initially identified a small proportion of positive scans (1.4%) acquired on portable devices, with just over half of this this percentage negative scans (0.9%). This was then extended to all studies taken on the same scanner models, such that 14.3% of positive X-rays and 16.7% of negative X-rays were estimated to come from portable machines. These preliminary findings do not suggest a large imbalance in the ratio of portable and non-portable scanners between the positive and control cohorts. However, in lieu of a more definitive method for identifying portable machines from DICOM information we estimated prevalence based on notes in the Body Part Examined attribute. It is plausible that this method under-estimates the true number of portable scanners, as such, further investigation of this issue is recommended. Examining a sample of images from the various devices may provide a more robust measure of portability for data users but the above analysis serves to highlight this aspect of the NCCID data.

Awareness of potential model confounders is crucial to ensure efficacy of ML models, particularly with respect to how performance generalises beyond the training data. For instance, significant disparities in the prevalence of certain equipment types between the positive and control cohorts could produce an ML model that successfully differentiates the two groups. However, is it conceivable that the decision boundaries in such a model are based on attributes of the medical imaging machinery (e.g., resolution, projection etc.) rather than disease related attributes [19]. Data users should take care to balance their training samples, ensuring a good variety

of scanner types within both cohorts, to build models that generalise well to the variety of clinical imaging equipment used in the UK. Indeed, there are many additional confounders to be aware of including but not limited to (see Appendix B):

- Digital radiography (DR) vs computed radiography (CR) which are different techniques for digitising the X-ray signal, either directly from the panel (DR) or by scanning cassette-based phosphor storage plates into digital format (CR).
- Photometric interpretation, which refers to the image contrast such that MONOCHROME1 scans should be inverted to match MONOCHROME2 scans or vice versa.
- View positions, e.g., Anterior-Posterior (AP), Posterior-Anterior (PA), Lateral (LL), etc.

By collecting data from multiple Trusts and Health Boards across the UK, the NCCID strives to provide a training database that can cover many of these confounding factors, and improve the efficacy of any resulting machine learning models in the clinical setting.

### Findings of cohort analysis

#### Geographic Coverage

At time of analysis, the NCCID was not evenly sampled across the participating regions. We observed that COVID-19 positive-patients in the database largely originated from the Midlands, and very few patients originated from Wales and Northern England (Figure 6).

Several factors may underpin these disparities, including: 1) the number of NCCID sites within each region 2) the size and population coverage at each hospital site; 3) the number of positive COVID-19 cases recorded at each site; 4) the duration of time the site has been contributing to the NCCID for; and 5) the availability of research coordinators and PACS teams to upload all cases. Reason 3, is unlikely to be the driving factor, as indicated by Figure 7 in which PHE reported a more equal distribution of COVID-19 hospital admissions.

Low submissions from the North of England reflect the relatively small number of participating NCCID sites in these regions. The fact that the uptake of the programme has been even across different regions can be attributed to factors such as the reach of our professional network, constrained availability of staff to support our database, and variable responsiveness of local sites to national initiatives.

Regional disparities in the number of positive and negative cases submitted are more likely to be driven by factor 5, the capacity of PACS teams. The guidance given to hospital sites was to submit all positive cases with images taken in the acute setting, and a smaller sample of negative cases with acute imaging (approximately 100 per week if available). Due to the request for accompanying clinical data in positive cases, it is much easier for sites to submit negative cases, for whom only the images and a small number of clinical data points are required.

#### Demographic Coverage

The NCCID aims to be a UK-wide initiative assembling a database that is as representative as possible of the entire population. Nevertheless, the present geographical coverage of the NCCID is partially skewed, which, if additional data curation is not applied rigorously, may produce biases in ML models trained on this resource. For example, issues may occur because of the incorrect representation of specific demographic groups and clinical risk factors such as pre-existing conditions [28, 36]. Indeed, we observed some of these downstream effects in the population analysis, particularly in the regional proportions of age-groups within the NCCID, which

deviated most significantly from PHE data in the Midlands and Northern England. These effects accumulated in a general over-representation of younger adult patients compared to more elderly patients in the NCCID for both admissions and mortality.

In addition, the NCCID contains very low numbers of patients in the 0–5 and 6–17 age groups, partly because of the active omission of under-11s due to small counts, where the underlying cause is the low prevalence of symptomatic COVID-19 in children [37, 38]. Reduced availability of data for under-18s limits the use of the NCCID to adult diagnostic/prognostic models for the time being. This may change as the database grows, particularly as the exclusion of data from under-11s will be stopped once sufficiently high numbers are available.

The ethnic composition of the NCCID deviated from the 2011 UK census data. Whilst establishing the causes of this discrepancy would require additional investigation, the over-representation of Asian and Black groups for the admission data may, to some extent, be due to differences in the incidence of COVID-19. As a matter of fact, several studies have indicated higher corrected hospitalisation odds ratios for minority ethnic groups compared to people of white backgrounds [39, 40, 29, 28]. The reliability of the comparison between the NCCID and the census, however, is diminished by the fact that the latter is a decade old, so that more recent estimates (including the imminent 2021 national census) could exhibit a significant demographic shift in the benchmark for the UK population as a whole.

The comparison with ISARIC data was crucial for understanding how representative the NCCID is of the COVID-19 patient population that it is sampled from. Again, the NCCID displayed higher percentages of Asian and Black patients and lower percentages of White patients than the hospital admissions data from ISARIC. A similar effect was seen in the comparison with mortality data from NHSE.

The reasons why the NCCID diverges from other datasets in relation to ethnicity are not fully understood. Nevertheless, we believe that the most likely issue is the uneven geographical representation of the NCCID. This would be consistent with the fact that the Asian and Black groups are overrepresented, and the White group is underrepresented in every comparison of the NCCID with other nationwide datasets (UK census, NHSE and ISARIC). It is clear from the literature that the distribution of ethnicities in COVID related hospital admissions varies considerably between different regions [26, 36]. For example, Sapey et al. [41], which looked specifically at COVID positive hospital admissions from around Birmingham saw a much higher proportion (18.5%) of patients of South Asian ethnicity. Apea et al. [42], which carried out a similar analysis looking at COVID positive hospital admissions from around East London, saw a much higher proportion of patients of both South Asian and Black ethnicity (31% and 20% respectively). In an analogous way, the fact that a large fraction of the data in the NCCID has been collected in an urban area of the Midlands may have increased the representation of Asian and Black groups, and reduced that of the White group.

The male to female ratio of NCCID patients was found to closely align with the 60:40 split reported for COVID-patients by ISARIC. This is a departure from the approximately 50:50 split expected in the general population, as measured by the 2011 census data (where sex ratios are less likely to significantly vary over time, making the age of the census less of a limiting factor), and reflects findings of other COVID-19 studies [43, 44, 35]. A similar increased hazard ratio was observed in the male to female mortality rates, where the NCCID was well aligned to NHSE in hospital deaths data. Data users should be aware that there is a class imbalance (as is common in clinical studies) but unlikely to be severe enough to prevent the training of models that will generalise.

Overall, data users should keep in mind that, owing to the variable incidence of COVID-19, the NCCID is expected to have slightly different demographic composition to the general population. Several studies have reported different COVID-19 prevalence rates between men and women, ethnic groups and age groups [45, 28, 35, 43, 44, 29, 41, 40]. As more sites are on-boarded and the database grows, we expect the composition of the NCCID to more closely reflect the populations reported by e.g., PHE, ISARIC, and NHSE. For the meantime, data users should be aware of these differences, and how underrepresentation of certain groups might affect model performance for those individuals. Whilst the risk of model unfairness relating to demographic disparities is less obvious in medical imaging than for other ML applications (e.g., facial recognition for law enforcement [46]), it is probable that disease manifestation differs across age groups and ethnicities, or that the prevalence of comorbidities varies across ethnicities and between urban and non-urban populations. Therefore, these characteristics may still have negative effects on the fairness of ML models. Furthermore, disease-related class imbalances play a relevant role in quantifying algorithmic bias, where fairness definitions based on pure demographic parity [47, 48] may provide misleading measures of success and failure in this problem space, unless corrected to the relevant ratios.

#### Temporal Coverage

The low numbers of positive cases uploaded to the NCCID training dataset since September 2020 suggest that the data capture pipelines were (up to the analysis cut-off in October) still processing the large backlog of patients from the first wave of the pandemic. Users should note that ML models built from the training data will capture the characteristics of the first peak, and may not generalise completely to patients admitted during the subsequent winter peaks, particularly in view of the emergence of a new strain of SARS-CoV-2, lineage B.1.1.7 [49]. Failures to generalise over time could arise from several factors, including:

- potential changes to disease manifestation associated with the new strain of SARS-CoV-2 that has dominated prevalence in the UK starting from December 2020 [50, 51], though such effects are speculative at the time of publishing;
- the prevalence of flu-related comorbidities, expected to be more common in winter months;
- any changes in the use of imaging for diagnostic/prognostic purposes between the early stages and later stages of the pandemic;
- changes to treatment policies over time (such as the introduction of dexamethasone) and how these affect disease severity;
- the roll-out of the COVID-19 vaccination programme, which in the UK has begun on 8 December 2020 [52], and has delivered almost 49 million first doses [26] at the time of writing;
- changes to non-pharmaceutical interventions (behavioural restrictions like lockdowns) and the down-stream effects these have on which members of the population are exposed to the virus.

It is noteworthy that COVID-19 admissions for the general population peaked at approximately 20,000 per week (for the period and regions studied in this article), whilst the peak of positive patients in the NCCID was orders of magnitude lower, at just under 400. Any statistics or models derived from the NCCID database are therefore likely to suffer from sampling error, which should be considered when reporting such analyses.



## Next Steps

The NCCID has made significant progress within the space of a few months to collect a sizable dataset to support research into COVID-19. However, there are a number of next steps, summarised below, which the NCCID initiative aims to implement in the short-to-medium term in order to better support data users:

- i. We will re-engage with existing hospital sites to understand the reasons behind a decline in submission of recent cases and implement mitigating actions (see point 5).
- ii. We will engage new sites across the UK, focusing on rural and other underrepresented geographies, such as the North of England, Wales, Northern Ireland (point iv) and Scotland (point iii) to expand the geographic and demographic coverage of the NCCID.
- iii. We will implement a linkage with the Scottish National PACS and Safe Haven Network.
- iv. In Northern Ireland we will start by establishing a linkage with the Northern Trust PACS team.
- v. We will implement a connection with the ISARIC-4C [10] dataset to improve the completeness of the clinical data fields while reducing the burden on hospital staff, since the data is linked across as opposed to collected afresh. It is hoped that lighter data-gathering processes will attract new sites, and motivate existing ones to contribute even more to the database.
- vi. We will carry out investigative work beyond clinical variables and metadata into the quality of the images themselves so as to assess their utility for algorithmic development.
- vii. We will implement automation pilots in a selection of sites to establish a continuous feed of images for positive and negative patients. Clinical data for these sites will be provided through the ISARIC-4C linkage.

## Conclusion

This paper aimed to provide further detail on the content of the NCCID's training dataset, in order to support existing data users with their research efforts, raise awareness for the NCCID as a valuable resource that others may want to access, and inform both existing and potential data users of improvements we aim to make in future. The decision to publish this paper now, rather than after the improvements have been made, reflects the iterative nature of this particular initiative, and the urgency presented by the pandemic to ensure information is made available as quickly, transparently and securely as possible. The NCCID initiative has collected a large volume of imaging and clinical data within a short period of time; this has been achieved through the expertise of NCCID partners, lean agile delivery methods, and the prioritisation of COVID-19 response work. However, there are a number of considerations in the NCCID training dataset to be aware of, namely: 1) the limitations of its geographic and, consequently, demographic representation; 2) issues with clinical data quality and completeness. We have identified a number of improvements to address these considerations, and will continue to expand and refine the quality of the NCCID training dataset. Despite these limitations the NCCID provides a valuable resource to the medical imaging community, addressing many of the common pitfalls highlighted in a recent meta-analysis of COVID-19 imaging models [19]. In particular, as a centralised resource, housing high quality DICOM imaging data and clinical attributes for thousands of patients, across a variety of imaging machinery, the NCCID is large enough to mitigate many of the data quality/bias concerns of smaller fragmented resources, making it an important tool in supporting the response to the COVID-19 pandemic.

## Data Availability

The NCCID training data is available to any users, including software vendors, academics and clinicians, via a rigorous Data Access Request (DAR) process. Applications are adjudicated by an independent committee based on several factors including but not limited to relevance to COVID-19 and compliance with information governance regulations. The required paperwork and additional instructions are detailed on the [website](#).

Additional information on the NCCID, including an overview of participating sites, existing data processors, live updates on the size of the training data and instructions for requesting access are all available through the main [webpage](#).

More information on guidelines and data schemas for the clinical data are available through [RSNFT](#), further detail is also provided through the [HDRUK portal](#).

Snapshots of the code and copies of the forms for data access are available from the GigaScience GigaDB repository [53].

## Availability of source code

The codebase for the data warehouse is open source and available through the [NHSX github](#):

- Project: [covid-chest-imaging-database](#)
- Operating system(s): e.g. Platform independent
- Programming language: Python
- License: MIT

The open-source data ingestion and cleaning pipeline can be found on [NHSX github](#):

- Project: [nccid-cleaning](#) (v.0.3.0)
- Operating system(s): e.g. Platform independent
- Programming language: Python
- License: MIT

## Additional Files

Appendix

## Declarations

### Ethical Approval and Consent for publication

The legal basis for the NCCID is provided by the notice under regulation 3(4) of the UK National Health Service (Control of Patient Information) Regulations 2002 (COPI Notice), and ethical approval was obtained for the NCCID to operate as a research database by the UK Health Research Authority. The initiative has received Ethics approval by both the Health Research Authority (HRA) and the Scottish Public Benefit Privacy Panel (PBPP). As the NCCID only contains pseudonymised information, individual consent to publish is not required.

### Competing Interests

No conflicts of interest to declare.

### Funding

The NCCID is publicly funded by NHSX. Joseph Jacob was supported by a Wellcome Trust Clinical Research Career Development Fellowship (209553/Z/17/Z) and by the NIHR BRC at UCL.

## Author's Contributions

D.C. provided supervision, project administration and support on funding acquisition. Ot.B., S.D, F.L, E.J, provided project administration and supported the reviewing and editing of the manuscript. Os.B and R.B contributed to the literature review and sections of the manuscript, in addition R.B provided project administration, and helped conceptualise the analysis. T.G. performed/supervised the data analysis, drafted the manuscript, contributed to software and helped conceptualise the analysis. D.S. performed parts of the data analysis and contributed to the manuscript, helped conceptualise the analysis and contributed to software. A.C. helped conceptualise/support parts of the data analysis and contributed to software. G.I. provided conceptual input, implemented the data warehouse and contributed to software, parts of the data analysis and manuscript. J.J and A.F provided project supervision, conceptual input, project administration and reviewed/edited the manuscript. M.H-B. provided conceptual input, implemented the data collection infrastructure, contributed to software, project administration, and other resources. J.C.W provided conceptual input and reviewed/edited the manuscript. The NCCID collective is responsible for curating and providing the data at participating hospital sites.

## Acknowledgements

The authors would like to thank the following individuals for their contributions to this work: Ayub Bhayat, Hena Aziz, Zain Eisa, Rob Howieson, Alison Lowe, Aliya Rafique, Anastasios Sarellas and Giuseppe Sollazzo.

## Author ORCID Information

- Oscar Bennett [orcid.org/0000-0003-4546-1807](https://orcid.org/0000-0003-4546-1807)
- Ottavia Bertolli [orcid.org/0000-0001-8578-3216](https://orcid.org/0000-0001-8578-3216)
- Tara Ganepola [orcid.org/0000-0002-6231-3542](https://orcid.org/0000-0002-6231-3542)
- Mark Halling-Brown [orcid.org/0000-0002-6247-4768](https://orcid.org/0000-0002-6247-4768)
- Gergely Imreh [orcid.org/0000-0001-7892-0366](https://orcid.org/0000-0001-7892-0366)
- Joe Jacob [orcid.org/0000-0002-8054-2293](https://orcid.org/0000-0002-8054-2293)
- Emily Jefferson [orcid.org/0000-0003-2992-7582](https://orcid.org/0000-0003-2992-7582)
- François Lemarchand [orcid.org/0000-0003-3019-2544](https://orcid.org/0000-0003-3019-2544)
- Daniel Schofield [orcid.org/0000-0002-9251-8653](https://orcid.org/0000-0002-9251-8653)

## References

1. Kanne JP, Bai H, Bernheim A, Chung M, Haramati LB, Kallmes DF, et al. COVID-19 imaging: What we know now and what remains unknown. *Radiology* 2021;299(3):E262–E279.
2. Hosseiny M, Kooraki S, Gholamrezaezhad A, Reddy S, Myers L. Radiology perspective of coronavirus disease 2019 (COVID-19): lessons from severe acute respiratory syndrome and Middle East respiratory syndrome. *American Journal of Roentgenology* 2020;214(5):1078–1082.
3. Kooraki S, Hosseiny M, Myers L, Gholamrezaezhad A. Coronavirus (COVID-19) outbreak: what the department of radiology should know. *Journal of the American college of radiology* 2020;17(4):447–451.
4. Shi H, Han X, Jiang N, Cao Y, Alwalid O, Gu J, et al. Radiological findings from 81 patients with COVID-19 pneumonia in Wuhan, China: a descriptive study. *The Lancet infectious diseases* 2020;20(4):425–434.
5. Lee EY, Ng MY, Khong PL. COVID-19 pneumonia: what has CT taught us? *The Lancet Infectious Diseases* 2020;20(4):384–385.
6. Summers RM, Artificial Intelligence of COVID-19 imaging: a hammer in search of a nail. *Radiological Society of North America*; 2021.
7. Chung M, Bernheim A, Mei X, Zhang N, Huang M, Zeng X, et al. CT imaging features of 2019 novel coronavirus (2019-nCoV). *Radiology* 2020;295(1):202–207.
8. Kanne JP, Chest CT findings in 2019 novel coronavirus (2019-nCoV) infections from Wuhan, China: key points for the radiologist. *Radiological Society of North America*; 2020.
9. Cleverley J, Piper J, Jones MM. The role of chest radiography in confirming covid-19 pneumonia. *bmj* 2020;370.
10. ISARIC 4c;. Accessed: 2021-03-23. <https://isaric4c.net/>.
11. Tsai EB, Simpson S, Lungren MP, Hershman M, Roshkovan L, Colak E, et al. The RSNA International COVID-19 Open Radiology Database (RICORD). *Radiology* 2021;299(1):E204–E213.
12. Maxmen A. One million coronavirus sequences: popular genome site hits mega milestone. *Nature* 2021;593(7857):21–21.
13. Khuzani AZ, Heidari M, Shariati SA. COVID-Classifer: An automated machine learning model to assist in the diagnosis of COVID-19 infection in chest x-ray images. *Scientific Reports* 2021;11(1):1–6.
14. Gangloff C, Rafi S, Bouzillé G, Soulat L, Cuggia M. Machine learning is the key to diagnose COVID-19: a proof-of-concept study. *Scientific reports* 2021;11(1):1–11.
15. Shiri I, Sorouri M, Geramifar P, Nazari M, Abdollahi M, Salimi Y, et al. Machine learning-based prognostic modeling using clinical data and quantitative radiomic features from chest CT images in COVID-19 patients. *Computers in biology and medicine* 2021;132:104304.
16. Fernandes FT, de Oliveira TA, Teixeira CE, de Moraes Batista AF, Dalla Costa G, Chiavegatto Filho ADP. A multipurpose machine learning approach to predict COVID-19 negative prognosis in São Paulo, Brazil. *Scientific reports* 2021;11(1):1–7.
17. Booth AL, Abels E, McCaffrey P. Development of a prognostic model for mortality in COVID-19 infection using machine learning. *Modern Pathology* 2021;34(3):522–531.
18. Syeda HB, Syed M, Sexton KW, Syed S, Begum S, Syed F, et al. Role of machine learning techniques to tackle the COVID-19 crisis: Systematic review. *JMIR medical informatics* 2021;9(1):e23811.
19. Roberts M, Driggs D, Thorpe M, Gilbey J, Yeung M, Ursprung S, et al. Common pitfalls and recommendations for using machine learning to detect and prognosticate for COVID-19 using chest radiographs and CT scans. *Nature Machine Intelligence* 2021;3(3):199–217.
20. NHSX AI Lab;. Accessed: 2021-03-23. <https://www.nhs.uk/nhs.uk/ai-lab/about-nhs-ai-lab/>.
21. Jacob J, Alexander D, Baillie JK, Berka R, Bertolli O, Blackwood J, et al. Using imaging to combat a pandemic: rationale for developing the UK National COVID-19 Chest Imaging Database. *European Respiratory Journal* 2020;56(2).
22. Watson J, Whiting PF, Brush JE. Interpreting a covid-19 test result. *Bmj* 2020;369.
23. BSTI: Thoracic Imaging in COVID-19 Infection.;. Accessed: 2021-03-23. [https://www.bsti.org.uk/media/resources/files/BSTI\\_COVID-19\\_Radiology\\_Guidance\\_version\\_2\\_16.03.20.pdf](https://www.bsti.org.uk/media/resources/files/BSTI_COVID-19_Radiology_Guidance_version_2_16.03.20.pdf).
24. Pydicom;. Accessed: 2021-03-23. <https://pydicom.github.io/>.
25. NHS Regional Teams;. Accessed: 2021-03-23. <https://www.england.nhs.uk/about/regional-area-teams/>.
26. Public Health England: coronavirus dashboard;. Accessed:

- 2021-03-23. <https://coronavirus.data.gov.uk/>.
27. ONS geography portal: NHS England Regions (April 2020) Boundaries EN BFE;. Accessed: 2021-03-23. <https://geoportal.statistics.gov.uk/datasets/nhs-england-regions-april-2020-boundaries-en-bfe>.
  28. Docherty AB, Harrison EM, Green CA, Hardwick HE, Pius R, Norman L, et al. Features of 20 133 UK patients in hospital with covid-19 using the ISARIC WHO Clinical Characterisation Protocol: prospective observational cohort study. *bmj* 2020;369.
  29. Harrison EM, Docherty AB, Barr B, Buchan I, Carson G, Drake TM, et al. Ethnicity and outcomes from COVID-19: the ISARIC CCP-UK prospective observational cohort study of hospitalised patients 2020;.
  30. 2011 Census: Population Estimates for the United Kingdom, March 2011;. Accessed: 2021-03-23. <https://www.ons.gov.uk/peoplepopulationandcommunity/populationandmigration/populationestimates/bulletins/2011censuspopulationestimatesfortheunitedkingdom/2012-12-17>.
  31. NHS COVID-19 Daily Deaths;. Accessed: 2021-03-23. <https://www.england.nhs.uk/statistics/statistical-work-areas/covid-19-daily-deaths/>.
  32. Guan Wj, Liang Wh, Zhao Y, Liang Hr, Chen Zs, Li Ym, et al. Comorbidity and its impact on 1590 patients with COVID-19 in China: a nationwide analysis. *European Respiratory Journal* 2020;55(5).
  33. Wang B, Li R, Lu Z, Huang Y. Does comorbidity increase the risk of patients with COVID-19: evidence from meta-analysis. *Aging (Albany NY)* 2020;12(7):6049.
  34. de Lucena TMC, da Silva Santos AF, de Lima BR, de Albuquerque Borborema ME, de Azevêdo Silva J. Mechanism of inflammatory response in associated comorbidities in COVID-19. *Diabetes & Metabolic Syndrome: Clinical Research & Reviews* 2020;14(4):597-600.
  35. Petrilli CM, Jones SA, Yang J, Rajagopalan H, O'Donnell L, Chernyak Y, et al. Factors associated with hospital admission and critical illness among 5279 people with coronavirus disease 2019 in New York City: prospective cohort study. *Bmj* 2020;369.
  36. Pollán M, Pérez-Gómez B, Pastor-Barriuso R, Oteo J, Hernán MA, Pérez-Olmeda M, et al. Prevalence of SARS-CoV-2 in Spain (ENE-COVID): a nationwide, population-based seroepidemiological study. *The Lancet* 2020;396(10250):535-544.
  37. Ludvigsson JF. Systematic review of COVID-19 in children shows milder cases and a better prognosis than adults. *Acta paediatrica* 2020;109(6):1088-1095.
  38. Dong Y, Mo X, Hu Y, Qi X, Jiang F, Jiang Z, et al. Epidemiology of COVID-19 among children in China. *Pediatrics* 2020;145(6).
  39. Martin CA, Jenkins DR, Minhas JS, Gray LJ, Tang J, Williams C, et al. Socio-demographic heterogeneity in the prevalence of COVID-19 during lockdown is associated with ethnicity and household size: Results from an observational cohort study. *EclinicalMedicine* 2020;25:100466.
  40. Sze S, Pan D, Nevill CR, Gray LJ, Martin CA, Nazareth J, et al. Ethnicity and clinical outcomes in COVID-19: a systematic Review and Meta-analysis. *EclinicalMedicine* 2020;p. 100630.
  41. Sapey E, Gallier S, Mainey C, Nightingale P, McNulty D, Crothers H, et al. Ethnicity and risk of death in patients hospitalised for COVID-19 infection in the UK: an observational cohort study in an urban catchment area. *Bmj open respiratory research* 2020;7(1):e000644.
  42. Apea VJ, Wan YI, Dhairyawan R, Puthuchearu ZA, Pearse RM, Orkin CM, et al. Ethnicity and outcomes in patients hospitalised with COVID-19 infection in East London: an observational cohort study. *BMJ open* 2021;11(1):e042140.
  43. Gebhard C, Regitz-Zagrosek V, Neuhauser HK, Morgan R, Klein SL. Impact of sex and gender on COVID-19 outcomes in Europe. *Biology of sex differences* 2020;11:1-13.
  44. Klein SL, Dhakal S, Ursin RL, Deshpande S, Sandberg K, Mauvais-Jarvis F. Biological sex impacts COVID-19 outcomes. *PLoS pathogens* 2020;16(6):e1008570.
  45. Public Health England: Disparities in the risk and outcomes of COVID-19;. Accessed: 2021-03-23. [https://assets.publishing.service.gov.uk/government/uploads/system/uploads/attachment\\_data/file/908434/Disparities\\_in\\_the\\_risk\\_and\\_outcomes\\_of\\_COVID\\_August\\_2020\\_update.pdf](https://assets.publishing.service.gov.uk/government/uploads/system/uploads/attachment_data/file/908434/Disparities_in_the_risk_and_outcomes_of_COVID_August_2020_update.pdf).
  46. Independent report on the London Metropolitan Police Service's trial of live facial recognition technology;. Accessed: 2021-03-23. <http://repository.essex.ac.uk/24946/1/>.
  47. Begley T, Schwedes T, Frye C, Feige I. Explainability for fair machine learning. *arXiv preprint arXiv:201007389* 2020;.
  48. Mehrabi N, Morstatter F, Saxena N, Lerman K, Galstyan A. A survey on bias and fairness in machine learning. *ACM Computing Surveys* 2021;54(115):1-35. <https://doi.org/10.1145/3457607>.
  49. Rambaut A. et. al, Preliminary genomic characterisation of an emergent SARS-CoV-2 lineage in the UK defined by a novel set of spike mutations;. Accessed: 2021-03-23. <https://virological.org/t/>.
  50. Kirby T. New variant of SARS-CoV-2 in UK causes surge of COVID-19. *The Lancet Respiratory Medicine* 2021;9(2):e20-e21.
  51. Volz E, Mishra S, Chand M, Barrett JC, Johnson R, Geidelberg L, et al. Transmission of SARS-CoV-2 Lineage B. 1.1.7 in England: Insights from linking epidemiological and genetic data. *medRxiv* 2021;p. 2020-12.
  52. BBC: First COVID vaccine UK;. Accessed: 2021-03-23. <https://www.bbc.co.uk/news/uk-55227325>.
  53. Cushnan D, Bennett O, Berka R, Bertolli O, Chopra A, Dorgham S, et al. Supporting data for "An overview of the National COVID-19 Chest Imaging Database: data quality and cohort analysis" 2021;GigaScience Database. <http://dx.doi.org/10.5524/100927>.

|                                     | count | mean    | std     | min   | 25%    | 50%   | 75%    | max       |
|-------------------------------------|-------|---------|---------|-------|--------|-------|--------|-----------|
| apache_score_on_itu_arrival         | 97    | 16.4361 | 8.18156 | 0     | 12     | 16    | 20     | 43        |
| creatinine_on_admission             | 1530  | 119.463 | 121.541 | 0.067 | 68     | 86    | 119.75 | 1569      |
| crp_on_admission                    | 1486  | 102     | 98.9551 | 0     | 27.925 | 76    | 145    | 1310      |
| d-dimer_on_admission                | 333   | 1268.26 | 4439.43 | 0.02  | 0.95   | 2.633 | 605    | 49531     |
| diastolic_bp                        | 2669  | 74.2296 | 13.7393 | 33    | 66     | 74    | 82     | 180       |
| duration_of_symptoms                | 1058  | 6.362   | 8.6413  | 0     | 1      | 5     | 9      | 186       |
| ferritin                            | 609   | 74318.1 | 461939  | 1.1   | 250    | 698   | 1846   | 6.961e+06 |
| fiO2_percentage                     | 547   | 36.3144 | 28.5774 | 0     | 21     | 28    | 40     | 100       |
| fibrinogen_if_d-dimer_not_performed | 368   | 6.12103 | 3.89517 | 1     | 4.6    | 5.9   | 7.3825 | 72        |
| heart_rate_on_admission             | 1313  | 91.0274 | 20.2362 | 33    | 77     | 89    | 103    | 189       |
| lymphocyte_count_on_admission       | 1530  | 2.27093 | 25.8469 | 0.09  | 0.6    | 0.9   | 1.3    | 700       |
| news2_score_on_arrival              | 1196  | 4.06657 | 3.12194 | 0     | 2      | 4     | 6      | 17        |
| o2_saturation                       | *     | *       | *       | *     | *      | *     | *      | *         |
| pao2                                | 1083  | 79.2103 | 32.8453 | 0     | 89     | 95    | 97     | 100       |
| platelet_count_on_admission         | 1531  | 235.133 | 123.027 | 1.2   | 160    | 214   | 289    | 2400      |
| respiratory_rate_on_admission       | 1312  | 22.5739 | 6.60553 | 0     | 18     | 20    | 25     | 63        |
| systolic_bp                         | 2670  | 128.483 | 22.8418 | 46    | 113    | 126   | 142    | 240       |
| temperature_on_admission            | 1305  | 37.3076 | 1.11667 | 27.9  | 36.5   | 37.2  | 38     | 40.7      |
| troponin_i                          | 541   | 891.01  | 8286.65 | 2     | 9      | 20    | 80     | 172696    |
| troponin_t                          | 108   | 312.877 | 2406.31 | 2     | 11     | 22.5  | 55.25  | 25000     |
| urea_on_admission                   | 1520  | 8.95618 | 7.62231 | 1.1   | 4.7    | 6.75  | 10.5   | 99        |
| wcc_on_admission                    | 1533  | 9.31315 | 24.5685 | 0.3   | 5.1    | 7.4   | 10.5   | 938       |



Click here to access/download  
**Supplementary Material**  
Appendix.pdf



Supplement: giab076_giga-d-21-00096_revision_2.pdf [file giab076_giga-d-21-00096_revision_2.pdf]
