# Supplementary material for: An overview of the National COVID-19 Chest Imaging Database: data quality and cohort analysis
Source: PubMed Central journal article supplement (PMC8633457; doi:10.1093/gigascience/giab076), 2021-11-25
Supplement: giab076_online_appendix.pdf [file giab076_online_appendix.pdf]

## Appendix

### A. Glossary

**Imaging study** – a study is either an X-ray, CT or MRI examination. Studies may contain multiple images (series) if i.e., several projections, body positions, fields of view, contrast types etc., were acquired during the appointment, but all of these individual images (image volumes for 3D modalities) are all amalgamated to a single data point in time – a study. Each study is assigned a unique accession number on PACS.

**Site Definition** – when referring to a ‘site’ in this paper we are talking about a Submitting Centre for NCCID. This is a Trust in England, or a Health Board in Wales. A single Trust or a Health Board can contain many different contributing hospital sites.

Sites contributing as of 29th October 2020:

- Ashford and St Peter’s Hospitals NHS Foundation Trust
- Betsi Cadwaladr University Health Board
- Brighton and Sussex University Hospitals NHS Trust
- Cambridge University Hospitals NHS Foundation Trust
- Cwm Taf Morgannwg University Health Board
- George Eliot Hospital NHS Trust
- Hampshire Hospitals NHS Foundation Trust
- Imperial College Healthcare NHS Trust
- Liverpool Heart and Chest Hospital NHS Foundation Trust
- London North West University Healthcare NHS Trust
- NorfolkNorfolk and Norwich University Hospitals NHS Foundation Trust
- Oxford University Hospitals NHS Foundation Trust
- Royal Cornwall Hospitals NHS Trust
- Royal Surrey NHS Foundation Trust
- Royal United Hospitals Bath NHS Foundation Trust
- Sandwell and West Birmingham NHS Trust
- Sheffield Children’s NHS Foundation Trust
- Somerset NHS Foundation Trust
- West Suffolk NHS Foundation Trust

The NCCID are continually onboarding new sites, a up to date list of submitters is available on the NCCID [information page](#).

### B. Scanner and image types

#### *Manufacturer Models*

The full list of model types for X-ray and CT across all imaging available in the dataset are included in Tables B.1 and B.2 in the Appendix where counts below 100, have been suppressed for brevity but all the model names have been listed below.

A single model type accounts for all X-ray studies from the largest supplier: Siemens – fluorospot compact FD. For the second largest X-ray supplier, Fujifilm, the model attribute was universally missing, making it hard to determine if single or multiple models are present. Most other X-ray manufacturers had multiple models available in the dataset. In the case of CT studies, the dominant manufacturer (Siemens) was split across ten different models, two of which had more than 500 studies each.

X-ray counts below 100 from:

**agfa** – cr15-x, dx-g, dxd30\_wireless, dxd40\_1000c, pixium\_4343e\_csi

**canon inc.** – axiom-multix m, cxdi, cxdi control software ne

**carestream health** – classic cr, **cr0850a**, drx-1, elite cr

**drgem** – gxr system

**ge healthcare** – discovery xr656, geode platform, global 1 platform, **wdr1**

**kodak** – classic cr, **cr850**, cr950, **cr975/cr0975**, drx-evolution, elite cr

**konica minolta** – 0862, cs-7

**philips medical systems** – pcr eleva

**samsung electronics** – dgr-c26u2b/us, dgr-ma1ba1/wr, dgr2aaa1cae21w, gc85a, gm85basic, sdr-agc80/com

**siemens** – siemens fd-x

**toshiba\_mec** – tfd-3000a1

CT counts below 100:

**canon medical systems** – aquilion one, aquilion prime sp

**ge medical systems** – discovery 710, discovery ct750 hd, lightspeed16, lightspeed vct, optima ct660, revolution ct, revolution evo

**philips medical systems** – brilliance 64, ict 256, ingenuity core 128, ingenuity ct

**siemens** – emotion 16 (2007), sensation 64, somatom edge plus, somatom go.top, symbia intevo 16

**toshiba** – aquilion, aquilion one, aquilion prime, aquilion prime sp

**Table 1.** Model Manufacturer Name (X-ray). Machines that are suspected to be portable have been highlighted in red.

| Manufacturer - Model (X-ray)                  | Studies |
|-----------------------------------------------|---------|
| siemens - fluorospot compact fd               | 5093    |
| fujifilm corporation - missing                | 3560    |
| philips medical systems - digitaldiagnost     | 2414    |
| carestream health - drx-revolution            | 1050    |
| agfa - 3543eze                                | 719     |
| philips medical systems - mobilediagnost wdr  | 538     |
| ge healthcare - optima xr220                  | 526     |
| ge healthcare - discovery xr656 hd            | 277     |
| philips medical systems - digitaldiagnost c90 | 249     |
| kodak - cr850a                                | 224     |
| samsung electronics - gm85                    | 211     |
| carestream health - cr975/cr0975              | 188     |
| carestream health - drx-evolution             | 179     |
| samsung electronics - gr40cw                  | 174     |
| ge healthcare - definium 6000                 | 168     |
| varian - varian_4336                          | 151     |
| agfa - cr 35                                  | 143     |
| kodak - dr 7500                               | 132     |
| agfa - cr30-x                                 | 117     |
| agfa - cr 85                                  | 115     |
| ge healthcare - thunder platform              | 110     |
| varian - varian_4343r                         | 110     |

**Table 2.** Model Manufacturer Name (CT)

| Manufacturer - Model (CT)          | Studies |
|------------------------------------|---------|
| siemens - somatom definition as    | 624     |
| siemens - somatom definition flash | 568     |
| siemens - somatom definition as+   | 412     |
| siemens - somatom drive            | 200     |
| siemens - somatom definition edge  | 141     |
| siemens - somatom perspective      | 109     |
| siemens - somatom force            | 103     |

### X-ray format

**Table 3.** The number of X-ray studies in Digital Radiography (DX) and Computed Radiography (CR) formats as identified from the Modality DICOM attribute (0008, 0060) for COVID positive and negative patients.

| Modality (X-ray Studies)  | Positive | Negative |
|---------------------------|----------|----------|
| DX (Digital Radiography)  | 5026     | 4056     |
| CR (Computed Radiography) | 6699     | 1476     |

### Photometric Interpretation

**Table 4.** The number of MONOCHROME1 and MONOCHROME2 X-ray studies as identified by the Photometric Interpretation attribute (0028, 0004) for COVID positive and negative patients. Images identified as MONOCHROME1 will need to be inverted to be aligned with those with MONOCHROME2.

| Photometric Interpretation (X-ray Studies) | Positive | Negative |
|--------------------------------------------|----------|----------|
| MONOCHROME2                                | 8254     | 2562     |
| MONOCHROME1                                | 3478     | 2971     |

### View Position

**Table 5.** The number of X-ray studies by View Position attribute (0018, 5101) for COVID positive and negative patients e.g., Anterior-Posterior (AP), Posterior-Anterior (PA), Lateral (LL).

| View Position (X-ray Studies) | Positive | Negative |
|-------------------------------|----------|----------|
| Missing                       | 6662     | 2692     |
| AP                            | 3076     | 1598     |
| PA                            | 2003     | 1394     |
| OTHER                         | 10       | 7        |

### C. Clinical data summary statistics

|                                     | count | mean    | std     | min   | 25%    | 50%   | 75%    | max       |
|-------------------------------------|-------|---------|---------|-------|--------|-------|--------|-----------|
| apache_score_on_itu_arrival         | 97    | 16.4361 | 8.18156 | 0     | 12     | 16    | 20     | 43        |
| creatinine_on_admission             | 1530  | 119.463 | 121.541 | 0.067 | 68     | 86    | 119.75 | 1569      |
| crp_on_admission                    | 1486  | 102     | 98.9551 | 0     | 27.925 | 76    | 145    | 1310      |
| d-dimer_on_admission                | 333   | 1268.26 | 4439.43 | 0.02  | 0.95   | 2.633 | 605    | 49531     |
| diastolic_bp                        | 2669  | 74.2296 | 13.7393 | 33    | 66     | 74    | 82     | 180       |
| duration_of_symptoms                | 1058  | 6.362   | 8.6413  | 0     | 1      | 5     | 9      | 186       |
| ferritin                            | 609   | 74318.1 | 461939  | 1.1   | 250    | 698   | 1846   | 6.961e+06 |
| fiO2_percentage                     | 547   | 36.3144 | 28.5774 | 0     | 21     | 28    | 40     | 100       |
| fibrinogen_if_d-dimer_not_performed | 368   | 6.12103 | 3.89517 | 1     | 4.6    | 5.9   | 7.3825 | 72        |
| heart_rate_on_admission             | 1313  | 91.0274 | 20.2362 | 33    | 77     | 89    | 103    | 189       |
| lymphocyte_count_on_admission       | 1530  | 2.27093 | 25.8469 | 0.09  | 0.6    | 0.9   | 1.3    | 700       |
| news2_score_on_arrival              | 1196  | 4.06657 | 3.12194 | 0     | 2      | 4     | 6      | 17        |
| o2_saturation                       | *     | *       | *       | *     | *      | *     | *      | *         |
| pao2                                | 1083  | 79.2103 | 32.8453 | 0     | 89     | 95    | 97     | 100       |
| platelet_count_on_admission         | 1531  | 235.133 | 123.027 | 1.2   | 160    | 214   | 289    | 2400      |
| respiratory_rate_on_admission       | 1312  | 22.5739 | 6.60553 | 0     | 18     | 20    | 25     | 63        |
| systolic_bp                         | 2670  | 128.483 | 22.8418 | 46    | 113    | 126   | 142    | 240       |
| temperature_on_admission            | 1305  | 37.3076 | 1.11667 | 27.9  | 36.5   | 37.2  | 38     | 40.7      |
| troponin_i                          | 541   | 891.01  | 8286.65 | 2     | 9      | 20    | 80     | 172696    |
| troponin_t                          | 108   | 312.877 | 2406.31 | 2     | 11     | 22.5  | 55.25  | 25000     |
| urea_on_admission                   | 1520  | 8.95618 | 7.62231 | 1.1   | 4.7    | 6.75  | 10.5   | 99        |
| wcc_on_admission                    | 1533  | 9.31315 | 24.5685 | 0.3   | 5.1    | 7.4   | 10.5   | 938       |

Figure 1. Summary statistics for the admission metrics taken by the NCCID. Low number suppression is indicated with a \* for fields that have less than 7 counts.
