# Supplementary material for: An overview of the National COVID-19 Chest Imaging Database: data quality and cohort analysis
Source: PubMed Central journal article supplement (PMC8633457; doi:10.1093/gigascience/giab076), 2021-11-25
Supplement: giab076_response_to_reviewer_comments_revision_1.pdf [file giab076_response_to_reviewer_comments_revision_1.pdf]

# Author's Response To Reviewer Comments

Close

comments have been addressed on the attached revision

Close
